# Supplementary material for: Long-range proton relay shows an inverse linear free energy relationship depending on the pKa of the hydrogen-bonded wire
Source: Royal Society of Chemistry journal article supplement (doi:10.1039/c4ra15076g), 2014-12-02
Supplement: c4ra15076g1.pdf [file c4ra15076g1.pdf]

## Long-Range Proton Relay Shows an Inverse Linear Free Energy Relationship Depending on the pKa of the Hydrogen-Bonded Wire

Binh Khanh Mai and Yongho Kim\*

Department of Chemistry, Kyung Hee University, 1 Seochun-Dong, Giheung-Gu, Yongin-Si, Gyeonggi-Do, 446-701, Korea

E-mail: [yhkim@khu.ac.kr](mailto:yhkim@khu.ac.kr)

### The relation between the H-bond strength and length in the H-bonded chain

The charge transfer interaction between the lone pair electron of oxygen (or nitrogen) and anti-bonding orbital of O–H bond is an important component of the H-bond based on the NBO analysis, which can be used to estimate the strength of H-bond; the larger the charge transfer interaction, the stronger the H-bond becomes. Table S1 listed the H-bond lengths and the charge transfer energies, which are the donor-acceptor ( $n_{O(N)} \rightarrow \sigma^*_{O-H}$ ) interaction energies obtained from the NBO analysis. A good correlation was found between the charge transfer energies of each H-bond in the H-bonded chain and its lengths as depicted in Figure S1.

**Table S1.** The H-bond lengths (Å) and charge transfer energies (kcal/mol) for H-bonded chains.

| Acid-R <sub>a</sub> OH-R <sub>b</sub> OH-Base                           | $n_{O3} \rightarrow \sigma^*_{O1-H2}$ |        | $n_{O5} \rightarrow \sigma^*_{O3-H4}$ |        | $n_{N7} \rightarrow \sigma^*_{O5-H6}$ |        |
|-------------------------------------------------------------------------|---------------------------------------|--------|---------------------------------------|--------|---------------------------------------|--------|
|                                                                         | Distance                              | Energy | Distance                              | Energy | Distance                              | Energy |
| H <sub>2</sub> O – H <sub>2</sub> O                                     | 1.768                                 | 25.38  | 1.926                                 | 12.32  | 1.874                                 | 18.87  |
| H <sub>2</sub> O – CF <sub>3</sub> CH <sub>2</sub> OH                   | 1.768                                 | 25.57  | 1.930                                 | 11.92  | 1.678                                 | 48.84  |
| CF <sub>3</sub> CH <sub>2</sub> OH – H <sub>2</sub> O                   | 1.842                                 | 15.86  | 1.833                                 | 19.13  | 1.841                                 | 21.57  |
| CF <sub>3</sub> CH <sub>2</sub> OH – CF <sub>3</sub> CH <sub>2</sub> OH | 1.863                                 | 17.6   | 1.845                                 | 18.81  | 1.656                                 | 52.45  |

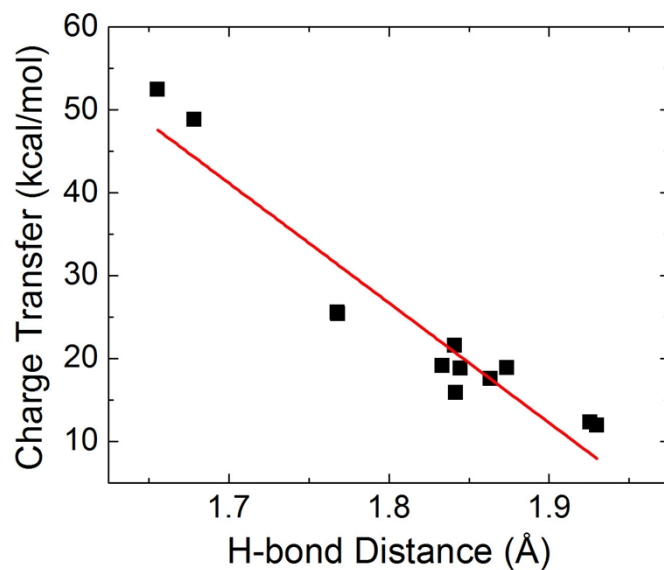

**Figure S1.** Correlation between the H-bond distance and the charge transfer energy in relay chain.

**Table S2.** Free energies of activation (kcal/mol) for the triple proton transfer in water when only one hydroxyl molecule in a wire is changed.

| H-bonded chains <sup>a</sup>                                           | Hydroxyl molecules |                                     |                                    |                                  |
|------------------------------------------------------------------------|--------------------|-------------------------------------|------------------------------------|----------------------------------|
|                                                                        | H <sub>2</sub> O   | CH <sub>2</sub> FCH <sub>2</sub> OH | CF <sub>3</sub> CH <sub>2</sub> OH | C <sub>6</sub> H <sub>5</sub> OH |
| A-H – H <sub>2</sub> O – <b>R<sub>b</sub>OH</b> – B                    | 7.27               | 6.76                                | 5.62                               | 5.09                             |
| A-H – <b>R<sub>a</sub>OH</b> – H <sub>2</sub> O – B                    | 7.27               | 5.75                                | 5.24                               | 3.67                             |
| A-H – CH <sub>2</sub> FCH <sub>2</sub> OH – <b>R<sub>b</sub>OH</b> – B | 5.75               | 4.58                                | 3.84                               | 3.35                             |
| A-H – <b>R<sub>a</sub>OH</b> – CH <sub>2</sub> FCH <sub>2</sub> OH – B | 6.76               | 4.58                                | 3.46                               | 2.78                             |
| A-H – CF <sub>3</sub> CH <sub>2</sub> OH – <b>R<sub>b</sub>OH</b> – B  | 5.24               | 3.46                                | 2.93                               | 2.17                             |
| A-H – <b>R<sub>a</sub>OH</b> – CF <sub>3</sub> CH <sub>2</sub> OH – B  | 5.62               | 3.84                                | 2.93                               | 1.97                             |
| A-H – C <sub>6</sub> H <sub>5</sub> OH – <b>R<sub>b</sub>OH</b> – B    | 3.67               | 2.78                                | 1.97                               | 1.37                             |
| A-H – <b>R<sub>a</sub>OH</b> – C <sub>6</sub> H <sub>5</sub> OH – B    | 5.09               | 4.35                                | 2.17                               | 1.37                             |

<sup>a</sup> A-H and B are denoted for carboxylic and imidazole groups, respectively

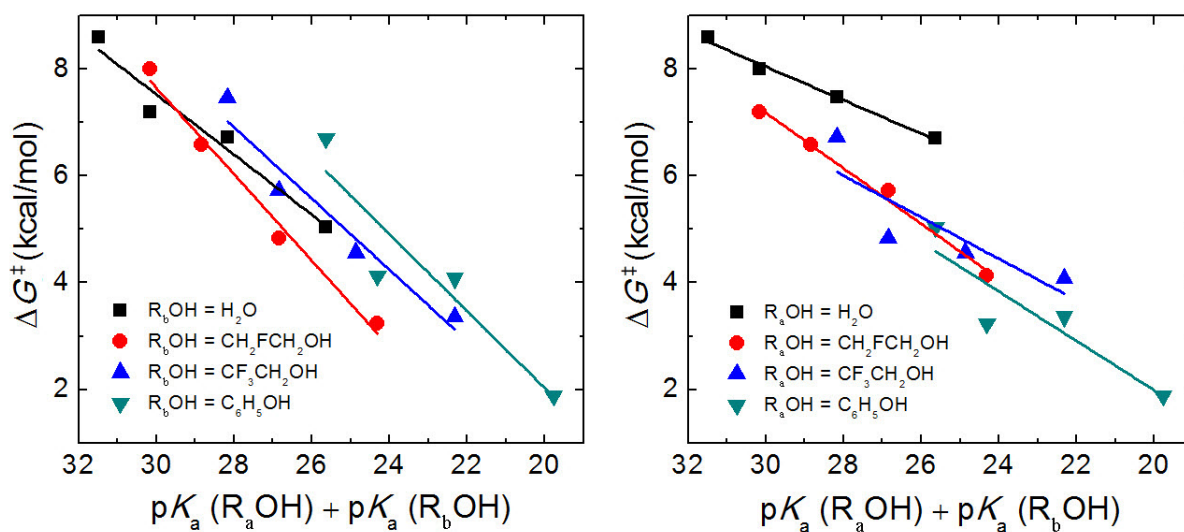

**Figure S2.** The correlation between the free energy of activation and the  $pK_a$  of hydroxyl molecules in a chain.

**Table S3.** Activation and reaction free energies ( $\Delta G^\ddagger$  and  $\Delta G_0$ , respectively, kcal/mol) for the triple proton relay with different pairs of chain molecules in solution with dielectric constant of 10.

| Pair                                                                             | Order <sup>a</sup> | $\Delta G^\ddagger$ | $\Delta G_0$ | Pair                                                                           | Order <sup>a</sup> | $\Delta G^\ddagger$ | $\Delta G_0$ |
|----------------------------------------------------------------------------------|--------------------|---------------------|--------------|--------------------------------------------------------------------------------|--------------------|---------------------|--------------|
| H <sub>2</sub> O<br>and<br>CF <sub>3</sub> CH <sub>2</sub> OH                    | S – S              | 8.64                | 4.92         | H <sub>2</sub> O<br>and<br>CH <sub>2</sub> FCH <sub>2</sub> OH                 | S – S              | 10.2                | 8.98         |
|                                                                                  | S – W              | 9.27                | 4.57         |                                                                                | S – W              | 10.9                | 8.04         |
|                                                                                  | W – S              | 10.7                | 9.32         |                                                                                | W – S              | 11.6                | 7.88         |
|                                                                                  | W – W              | 12.0                | 7.39         |                                                                                | W – W              | 12.0                | 7.39         |
| CH <sub>2</sub> FCH <sub>2</sub> OH<br>and<br>CF <sub>3</sub> CH <sub>2</sub> OH | S – S              | 8.64                | 4.92         | CF <sub>3</sub> CH <sub>2</sub> OH<br>and<br>C <sub>6</sub> H <sub>5</sub> OH  | S – S              | 3.92                | 2.39         |
|                                                                                  | S – W              | 9.23                | 4.15         |                                                                                | S – W              | 4.93                | 1.36         |
|                                                                                  | W – S              | 9.71                | 8.74         |                                                                                | W – S              | 6.17                | 5.77         |
|                                                                                  | W – W              | 10.2                | 8.98         |                                                                                | W – W              | 8.64                | 4.92         |
| H <sub>2</sub> O<br>and<br>C <sub>6</sub> H <sub>5</sub> OH                      | S – S              | 3.92                | 2.39         | CH <sub>2</sub> FCH <sub>2</sub> OH<br>and<br>C <sub>6</sub> H <sub>5</sub> OH | S – S              | 3.92                | 2.39         |
|                                                                                  | S – W              | 6.50                | 0.78         |                                                                                | S – W              | 5.37                | 1.62         |
|                                                                                  | W – S              | 10.1                | 9.34         |                                                                                | W – S              | 9.45                | 9.03         |
|                                                                                  | W – W              | 12.0                | 7.39         |                                                                                | W – W              | 10.2                | 8.98         |

<sup>a</sup> S and W denote hydroxyl molecules with relatively strong and weak acidities, respectively.

## Optimized Cartesian Coordinates:

### (1) Carboxylic group – H<sub>2</sub>O – H<sub>2</sub>O – Imidazole:

#### Reactant

|   |             |             |             |
|---|-------------|-------------|-------------|
| C | -0.66644200 | -1.37564100 | 0.78418400  |
| C | 0.50389000  | -2.29214100 | 1.18331500  |
| C | 1.83320600  | -1.52376200 | 1.05196500  |
| C | 2.05573900  | -1.02622800 | -0.40539300 |
| C | 0.82276400  | -0.24410700 | -0.93288400 |
| C | -0.52551000 | -0.95750000 | -0.69754000 |
| C | -1.65054600 | 0.02389700  | -1.09215400 |
| C | -3.07439000 | -0.48098400 | -0.72246600 |
| C | -3.16094000 | -1.01226900 | 0.74157900  |
| C | -2.03903800 | -2.03359600 | 1.01409200  |
| H | -0.61462300 | -0.45963000 | 1.40531500  |
| H | 0.51157400  | -3.18626300 | 0.53559300  |
| H | 0.37400700  | -2.63685800 | 2.22056600  |
| H | 2.68555300  | -2.15276800 | 1.35025100  |
| H | 1.81007600  | -0.65229800 | 1.72676400  |
| H | 2.23110400  | -1.90327900 | -1.05045900 |
| H | 0.95872600  | -0.04168300 | -2.00739200 |
| H | 0.77772500  | 0.72887600  | -0.42029700 |
| H | -0.58412800 | -1.86986400 | -1.31721900 |
| H | -1.44492000 | 0.97650900  | -0.58088400 |
| H | -1.61408400 | 0.21999200  | -2.17499700 |
| H | -3.35582600 | -1.29695400 | -1.40255100 |
| H | -4.15136800 | -1.46583300 | 0.89512600  |
| H | -3.06245900 | -0.17820700 | 1.45439500  |
| H | -2.14619400 | -2.90687600 | 0.34775000  |
| H | -2.11537900 | -2.39433900 | 2.05108300  |
| C | -4.08236800 | 0.62671600  | -0.91370300 |
| O | -5.06971800 | 0.53420600  | -1.62598600 |
| O | -3.87627400 | 1.76741000  | -0.24707000 |
| H | -3.05639700 | 1.78083000  | 0.30933900  |
| N | 3.35323900  | 1.05909800  | 0.09698200  |
| C | 3.26108000  | -0.14177000 | -0.45464300 |
| N | 4.42686400  | -0.47993800 | -1.05287200 |
| C | 4.63488000  | 1.49911500  | -0.16394400 |
| C | 5.31796400  | 0.55430800  | -0.87865800 |
| H | 4.98432000  | 2.46358900  | 0.17532600  |
| H | 6.32267300  | 0.52083100  | -1.26959700 |
| H | 4.60012000  | -1.34953200 | -1.54292300 |
| O | -1.80734800 | 2.20971400  | 1.48502700  |
| H | -1.97959800 | 1.71424800  | 2.29699700  |
| H | -0.84579300 | 2.12759500  | 1.33607700  |
| O | 1.07732400  | 2.19134700  | 1.40956500  |
| H | 1.88782100  | 1.81651300  | 0.98555100  |
| H | 1.39275400  | 2.77363500  | 2.11263800  |

#### TS

|   |             |            |             |
|---|-------------|------------|-------------|
| C | 0.68682500  | 1.54231800 | 0.63861300  |
| C | -0.46782400 | 2.50665800 | 0.96130500  |
| C | -1.79780000 | 1.73092700 | 0.90717000  |
| C | -2.03432200 | 1.11734700 | -0.50795300 |
| C | -0.78965200 | 0.35393700 | -1.04308400 |
| C | 0.56511000  | 1.05899100 | -0.82283600 |
| C | 1.65917400  | 0.01641400 | -1.15450800 |
| C | 3.09314400  | 0.38923500 | -0.68306400 |
| C | 3.14000300  | 1.04244500 | 0.73470600  |
| C | 2.07953600  | 2.15211300 | 0.86863600  |
| H | 0.58712000  | 0.66222500 | 1.30346000  |
| H | -0.47471700 | 3.34231600 | 0.24055900  |
| H | -0.33477200 | 2.93452600 | 1.96677500  |
| H | -2.65155900 | 2.37577600 | 1.16167100  |

|   |             |             |             |
|---|-------------|-------------|-------------|
| H | -1.75894600 | 0.91883000  | 1.65200600  |
| H | -2.30516400 | 1.92787900  | -1.20103500 |
| H | -0.93829700 | 0.13901800  | -2.11290300 |
| H | -0.72293800 | -0.61138300 | -0.52155900 |
| H | 0.65775300  | 1.93874400  | -1.48233400 |
| H | 1.35366100  | -0.92596000 | -0.68090800 |
| H | 1.68285600  | -0.16315500 | -2.24054300 |
| H | 3.53565000  | 1.09785400  | -1.39707200 |
| H | 4.15201400  | 1.44076900  | 0.89964800  |
| H | 2.95066800  | 0.28074400  | 1.50714200  |
| H | 2.26287600  | 2.95667400  | 0.13578000  |
| H | 2.13934400  | 2.59545100  | 1.87445500  |
| C | 3.96257500  | -0.85116600 | -0.66792300 |
| O | 5.04235300  | -0.90442400 | -1.25579700 |
| O | 3.54280000  | -1.89045100 | 0.02651900  |
| H | 2.60744400  | -1.84210100 | 0.54590500  |
| N | -3.10131300 | -1.06232700 | 0.12028100  |
| C | -3.16801700 | 0.15132500  | -0.42835900 |
| N | -4.42500600 | 0.34315500  | -0.84328700 |
| C | -4.34549700 | -1.65308300 | 0.05140900  |
| C | -5.18525000 | -0.77175500 | -0.55585800 |
| H | -4.52646600 | -2.64506100 | 0.43435200  |
| H | -6.23115300 | -0.83266000 | -0.80920100 |
| H | -4.75335100 | 1.18651400  | -1.30305800 |
| O | 1.44545500  | -1.99419500 | 1.33243300  |
| H | 1.67394300  | -2.48176300 | 2.13469500  |
| H | 0.27728200  | -2.06283200 | 1.20130900  |
| O | -0.96332400 | -2.15210800 | 1.11078900  |
| H | -2.19170600 | -1.51442800 | 0.55078100  |
| H | -1.23361400 | -2.86858400 | 1.70002400  |

#### Product

|   |             |             |             |
|---|-------------|-------------|-------------|
| C | -0.68041900 | -1.36472300 | 0.81588100  |
| C | 0.48180200  | -2.29048700 | 1.21913100  |
| C | 1.82230100  | -1.54488800 | 1.07193200  |
| C | 2.02688400  | -1.06582000 | -0.39722800 |
| C | 0.80320700  | -0.25688200 | -0.91225400 |
| C | -0.54472200 | -0.96677700 | -0.67224400 |
| C | -1.67191500 | 0.00731600  | -1.07944800 |
| C | -3.09474200 | -0.48486300 | -0.71101200 |
| C | -3.16894000 | -0.97450400 | 0.76426800  |
| C | -2.05918100 | -2.00191100 | 1.06621500  |
| H | -0.61291100 | -0.43990400 | 1.42292400  |
| H | 0.47501400  | -3.19297700 | 0.58361300  |
| H | 0.35858800  | -2.61853300 | 2.26234200  |
| H | 2.66809300  | -2.18504400 | 1.36193600  |
| H | 1.81933600  | -0.66884500 | 1.74120200  |
| H | 2.18381500  | -1.94599200 | -1.03994500 |
| H | 0.93742100  | -0.04694700 | -1.98481800 |
| H | 0.76217700  | 0.71064900  | -0.38615700 |
| H | -0.59846400 | -1.88744700 | -1.28010500 |
| H | -1.48203600 | 0.96504100  | -0.57296100 |
| H | -1.62454500 | 0.19577700  | -2.16423300 |
| H | -3.36931600 | -1.32555600 | -1.36615100 |
| H | -4.16350000 | -1.40909900 | 0.94885200  |
| H | -3.05056900 | -0.11336400 | 1.44194300  |
| H | -2.17567300 | -2.89127600 | 0.42255600  |
| H | -2.13255900 | -2.33688100 | 2.11246200  |
| C | -4.10801600 | 0.64280500  | -0.90827700 |
| O | -5.13045200 | 0.41983500  | -1.61223900 |
| O | -3.87384700 | 1.74746800  | -0.32412300 |
| H | -2.50164800 | 2.07974600  | 0.79241500  |
| N | 3.36867100  | 1.01130300  | 0.04633700  |

|   |             |             |             |                |             |             |             |
|---|-------------|-------------|-------------|----------------|-------------|-------------|-------------|
| C | 3.24432800  | -0.21330100 | -0.47223900 | <b>TS</b>      |             |             |             |
| N | 4.41574500  | -0.51824600 | -1.03229100 | C              | -1.78158000 | -1.67484300 | 0.97668200  |
| C | 4.64117800  | 1.49202500  | -0.18706100 | C              | -1.04750500 | -2.89366100 | 1.56175000  |
| C | 5.30622800  | 0.52478100  | -0.87034000 | C              | 0.45897900  | -2.76276100 | 1.26744300  |
| H | 4.95450900  | 2.46766500  | 0.14733600  | C              | 0.72729100  | -2.71042000 | -0.26884200 |
| H | 6.31313400  | 0.48279900  | -1.25204400 | C              | -0.18431600 | -1.68090900 | -0.99720100 |
| H | 4.60311500  | -1.39643300 | -1.50674300 | C              | -1.66554400 | -1.68679400 | -0.56269600 |
| O | -1.80389800 | 2.35298500  | 1.43324000  | C              | -2.30295600 | -0.41583200 | -1.17052700 |
| H | -1.98078900 | 1.83647800  | 2.23058000  | C              | -3.70478900 | -0.04467800 | -0.60535100 |
| H | 0.10557500  | 2.26156500  | 1.26881100  | C              | -3.84074300 | -0.24187300 | 0.93687200  |
| O | 1.07929600  | 2.30135200  | 1.34625100  | C              | -3.26408500 | -1.60129300 | 1.37939600  |
| H | 2.60984200  | 1.50530400  | 0.53490500  | H              | -1.27715800 | -0.76336200 | 1.35275800  |
| H | 1.25372300  | 2.91213300  | 2.07397800  | H              | -1.45139300 | -3.82304100 | 1.12440800  |
|   |             |             |             | H              | -1.20370400 | -2.94235000 | 2.65003500  |
|   |             |             |             | H              | 1.02805800  | -3.59869700 | 1.69931000  |
|   |             |             |             | H              | 0.82686800  | -1.83170100 | 1.73098100  |
|   |             |             |             | H              | 0.57407100  | -3.71549000 | -0.68966800 |
|   |             |             |             | H              | -0.10539500 | -1.84232800 | -2.08350100 |
|   |             |             |             | H              | 0.19555200  | -0.67026100 | -0.78820100 |
|   |             |             |             | H              | -2.17577200 | -2.59138200 | -0.93541800 |
|   |             |             |             | H              | -1.60677900 | 0.41306200  | -0.98279600 |
|   |             |             |             | H              | -2.38549700 | -0.52720900 | -2.26333100 |
|   |             |             |             | H              | -4.46601200 | -0.66921700 | -1.09326900 |
|   |             |             |             | H              | -4.90485200 | -0.15933500 | 1.20344300  |
|   |             |             |             | H              | -3.30513600 | 0.55585000  | 1.47331300  |
|   |             |             |             | H              | -3.81899100 | -2.43089400 | 0.90804600  |
|   |             |             |             | H              | -3.36660100 | -1.70683800 | 2.47051600  |
|   |             |             |             | C              | -4.00959100 | 1.40064800  | -0.94723900 |
|   |             |             |             | O              | -5.01843600 | 1.72196300  | -1.57851700 |
|   |             |             |             | O              | -3.16399000 | 2.32069900  | -0.53989400 |
|   |             |             |             | H              | -2.27065300 | 2.04277000  | 0.03162600  |
|   |             |             |             | N              | 2.62343500  | -1.07524900 | -0.30356400 |
|   |             |             |             | C              | 2.14447200  | -2.30672500 | -0.49501300 |
|   |             |             |             | N              | 3.16660400  | -3.07323700 | -0.88192800 |
|   |             |             |             | C              | 3.97651700  | -1.06010800 | -0.57032000 |
|   |             |             |             | C              | 4.32392500  | -2.32241400 | -0.93632800 |
|   |             |             |             | H              | 4.56878500  | -0.16327000 | -0.48320400 |
|   |             |             |             | H              | 5.26909700  | -2.74740300 | -1.23258000 |
|   |             |             |             | H              | 3.08436700  | -4.06073800 | -1.10323000 |
|   |             |             |             | O              | -1.14165900 | 1.94570000  | 0.78148300  |
|   |             |             |             | H              | -1.39560300 | 1.72177600  | 1.68670800  |
|   |             |             |             | H              | -0.07193800 | 1.44862500  | 0.59026100  |
|   |             |             |             | O              | 1.06582400  | 1.02097800  | 0.49306200  |
|   |             |             |             | H              | 2.02770800  | -0.25673900 | -0.00369000 |
|   |             |             |             | C              | 1.90314600  | 1.87384600  | 1.20934300  |
|   |             |             |             | H              | 1.37791500  | 2.40422300  | 2.01626500  |
|   |             |             |             | H              | 2.75640000  | 1.33922900  | 1.65048400  |
|   |             |             |             | C              | 2.48307200  | 2.93113700  | 0.29632200  |
|   |             |             |             | F              | 3.29600500  | 3.77950600  | 0.95927000  |
|   |             |             |             | F              | 1.52890800  | 3.68231200  | -0.29041200 |
|   |             |             |             | F              | 3.21227700  | 2.39590100  | -0.70504200 |
|   |             |             |             | <b>Product</b> |             |             |             |
|   |             |             |             | C              | -1.15723700 | -1.06267700 | 1.45759200  |
|   |             |             |             | C              | -0.12090700 | -1.70926400 | 2.39408200  |
|   |             |             |             | C              | 1.26813400  | -1.68956100 | 1.72871500  |
|   |             |             |             | C              | 1.24404500  | -2.45533100 | 0.37129300  |
|   |             |             |             | C              | 0.08781200  | -1.97252200 | -0.55143200 |
|   |             |             |             | C              | -1.27956400 | -1.89100100 | 0.15776500  |
|   |             |             |             | C              | -2.27811200 | -1.22916600 | -0.81727800 |
|   |             |             |             | C              | -3.65142300 | -0.89416000 | -0.18100700 |
|   |             |             |             | C              | -3.48380000 | -0.14229800 | 1.17010900  |
|   |             |             |             | C              | -2.53926800 | -0.90988200 | 2.11757700  |
|   |             |             |             | H              | -0.79294300 | -0.05130500 | 1.18439300  |
|   |             |             |             | H              | -0.42184100 | -2.74609400 | 2.62353100  |
|   |             |             |             | H              | -0.07709200 | -1.15778700 | 3.34577100  |
|   |             |             |             | H              | 2.02918700  | -2.14104900 | 2.38143400  |

**(2) Carboxylic group – H<sub>2</sub>O – CF<sub>3</sub>CH<sub>2</sub>OH – Imidazole**

**Reactant**

|   |             |             |             |
|---|-------------|-------------|-------------|
| C | -1.58566900 | -1.04506600 | 1.37631100  |
| C | -0.68686100 | -1.96186000 | 2.22436400  |
| C | 0.72808500  | -1.99934000 | 1.61660500  |
| C | 0.70588900  | -2.52869300 | 0.15208500  |
| C | -0.35701500 | -1.79691500 | -0.71512000 |
| C | -1.73797200 | -1.63315200 | -0.04429700 |
| C | -2.57573700 | -0.68922500 | -0.93505300 |
| C | -3.92444900 | -0.25741900 | -0.29129700 |
| C | -3.75968400 | 0.21590200  | 1.18550000  |
| C | -2.97286700 | -0.82511400 | 2.00568600  |
| H | -1.08518700 | -0.05903400 | 1.28746400  |
| H | -1.11875200 | -2.97719100 | 2.25932100  |
| H | -0.63594100 | -1.58745400 | 3.25837500  |
| H | 1.39884400  | -2.63299100 | 2.21615800  |
| H | 1.14162200  | -0.97725300 | 1.62358000  |
| H | 0.47711800  | -3.60652200 | 0.17493100  |
| H | -0.46480700 | -2.33174400 | -1.67221100 |
| H | 0.01564500  | -0.78800600 | -0.94576700 |
| H | -2.23898400 | -2.61312900 | 0.04434500  |
| H | -1.95827400 | 0.19822400  | -1.14037300 |
| H | -2.78196300 | -1.17309900 | -1.90252900 |
| H | -4.61936800 | -1.10833700 | -0.30715600 |
| H | -4.75721800 | 0.38338500  | 1.61775500  |
| H | -3.21569100 | 1.17313200  | 1.22049900  |
| H | -3.52192100 | -1.78171400 | 2.03905600  |
| H | -2.86437300 | -0.46751000 | 3.04088000  |
| C | -4.55340500 | 0.84798100  | -1.10585200 |
| O | -5.66747900 | 0.77896700  | -1.60079000 |
| O | -3.84282800 | 1.96795600  | -1.27620500 |
| H | -2.94362000 | 1.95805600  | -0.85911800 |
| N | 2.58811900  | -1.14874700 | -0.74741000 |
| C | 2.05416300  | -2.32837500 | -0.46503600 |
| N | 2.91305400  | -3.31911100 | -0.79046700 |
| C | 3.83763600  | -1.40243100 | -1.27323300 |
| C | 4.05613500  | -2.75169000 | -1.30795800 |
| H | 4.49338100  | -0.60558200 | -1.59328100 |
| H | 4.89236400  | -3.34483600 | -1.64297500 |
| H | 2.73253900  | -4.30928400 | -0.67292000 |
| O | -1.33674100 | 2.40066400  | -0.26955800 |
| H | -1.39457600 | 2.57729800  | 0.67940400  |
| H | -0.55122000 | 1.82993600  | -0.37379000 |
| O | 1.23921300  | 1.12236100  | -0.23862300 |
| H | 1.75479900  | 0.27950200  | -0.45995000 |
| C | 1.85366300  | 1.75302300  | 0.85201400  |
| H | 1.11583400  | 2.33332300  | 1.41535000  |
| H | 2.34374500  | 1.04267900  | 1.52811400  |
| C | 2.91225400  | 2.71303600  | 0.35819100  |
| F | 3.53643700  | 3.33068400  | 1.37883500  |
| F | 2.40035900  | 3.67575200  | -0.43253000 |
| F | 3.86047800  | 2.08685300  | -0.36698000 |

|                                                                                           |             |             |             |           |             |             |             |
|-------------------------------------------------------------------------------------------|-------------|-------------|-------------|-----------|-------------|-------------|-------------|
| H                                                                                         | 1.55948300  | -0.64084700 | 1.55120000  | O         | -3.69953200 | -3.37866900 | -1.73771500 |
| H                                                                                         | 1.12907300  | -3.53120700 | 0.57302700  | O         | -3.29010800 | -1.22179100 | -1.58260900 |
| H                                                                                         | 0.02562200  | -2.64121800 | -1.42405900 | H         | -2.67740600 | -0.56233700 | -1.18438400 |
| H                                                                                         | 0.32341200  | -0.96244700 | -0.92252500 | N         | 3.49128300  | 1.22181800  | -0.71973100 |
| H                                                                                         | -1.62656800 | -2.90363800 | 0.42834700  | C         | 3.87457400  | 0.03927600  | -0.26208400 |
| H                                                                                         | -1.81857600 | -0.29878800 | -1.18269000 | N         | 5.21017200  | -0.11631800 | -0.41327400 |
| H                                                                                         | -2.43404200 | -1.88381700 | -1.69033400 | C         | 4.63482800  | 1.84147800  | -1.17992300 |
| H                                                                                         | -4.20160400 | -1.82838600 | 0.00835100  | C         | 5.71535700  | 1.02362300  | -0.99603600 |
| H                                                                                         | -4.47404400 | -0.00379700 | 1.63106700  | H         | 4.60903900  | 2.83168300  | -1.61146300 |
| H                                                                                         | -3.06014500 | 0.85826000  | 0.98132000  | H         | 6.76381900  | 1.13903600  | -1.22174200 |
| H                                                                                         | -2.95275100 | -1.90872800 | 2.34213000  | H         | 5.73737300  | -0.93712900 | -0.13993100 |
| H                                                                                         | -2.44198100 | -0.36831300 | 3.07115500  | O         | -1.82707500 | 0.98488300  | -0.66010600 |
| C                                                                                         | -4.46838700 | -0.02633400 | -1.13267600 | H         | -0.86551300 | 1.18277900  | -0.68046200 |
| O                                                                                         | -5.62670200 | -0.40329600 | -1.46181400 | O         | 0.77364900  | 1.97973800  | -0.48275200 |
| O                                                                                         | -3.93350600 | 1.05308400  | -1.54474300 | H         | 1.73362100  | 1.75117100  | -0.57804900 |
| H                                                                                         | -2.34277300 | 1.67576100  | -1.08716400 | H         | 0.72095400  | 2.94408400  | -0.50134100 |
| N                                                                                         | 2.95641500  | -1.08535800 | -0.84698000 | C         | -2.38202200 | 1.51626800  | 0.51852700  |
| C                                                                                         | 2.53909000  | -2.24528900 | -0.33183600 | H         | -3.33451700 | 1.01826500  | 0.71817900  |
| N                                                                                         | 3.50524100  | -3.13672000 | -0.55503600 | H         | -1.71962900 | 1.40068200  | 1.38343500  |
| C                                                                                         | 4.20721300  | -1.24197600 | -1.40830000 | C         | -2.67358400 | 2.99051400  | 0.34607800  |
| C                                                                                         | 4.55669300  | -2.54148500 | -1.22408300 | F         | -1.55618200 | 3.70976300  | 0.12134300  |
| H                                                                                         | 4.72663500  | -0.42683300 | -1.88544100 | F         | -3.25803900 | 3.49981100  | 1.44552000  |
| H                                                                                         | 5.44052400  | -3.09035900 | -1.50546000 | F         | -3.49701000 | 3.23087600  | -0.69012000 |
| H                                                                                         | 3.45534700  | -4.11079600 | -0.27150100 | <b>TS</b> |             |             |             |
| O                                                                                         | -1.47434900 | 2.11602300  | -0.92041200 | C         | 0.42318100  | -1.82104100 | 1.24094100  |
| H                                                                                         | -1.59370000 | 2.62782000  | -0.10929400 | C         | 1.69693400  | -1.91757700 | 2.09763300  |
| H                                                                                         | 0.21972600  | 1.40974000  | -0.80855600 | C         | 2.68890800  | -0.82701500 | 1.64924100  |
| O                                                                                         | 1.16697800  | 1.28624100  | -0.57937100 | C         | 3.07293100  | -0.99586900 | 0.14619600  |
| H                                                                                         | 2.40383700  | -0.21994200 | -0.82287500 | C         | 1.82956600  | -1.18865900 | -0.76744100 |
| C                                                                                         | 1.42808800  | 1.97270100  | 0.61952300  | C         | 0.76319400  | -2.16422100 | -0.22652500 |
| H                                                                                         | 0.58533700  | 1.93010700  | 1.31869900  | C         | -0.47374900 | -2.01815300 | -1.14510700 |
| H                                                                                         | 2.31536600  | 1.54411000  | 1.09345600  | C         | -1.79499600 | -2.61719700 | -0.58112800 |
| C                                                                                         | 1.72590400  | 3.42971300  | 0.34057800  | C         | -1.99762500 | -2.37661300 | 0.94753400  |
| F                                                                                         | 2.01117600  | 4.09082900  | 1.47782600  | C         | -0.71971300 | -2.72257500 | 1.73534000  |
| F                                                                                         | 0.68590600  | 4.06214700  | -0.23683100 | H         | 0.06540800  | -0.77318400 | 1.27755800  |
| F                                                                                         | 2.77668000  | 3.58690000  | -0.48525800 | H         | 2.14579100  | -2.92041600 | 1.99083100  |
|                                                                                           |             |             |             | H         | 1.45192300  | -1.77331000 | 3.16082800  |
|                                                                                           |             |             |             | H         | 3.60659400  | -0.84524500 | 2.25529600  |
|                                                                                           |             |             |             | H         | 2.21437600  | 0.15817300  | 1.79271200  |
|                                                                                           |             |             |             | H         | 3.74531100  | -1.86225800 | 0.05162100  |
|                                                                                           |             |             |             | H         | 2.16816800  | -1.50886500 | -1.76528600 |
|                                                                                           |             |             |             | H         | 1.32999400  | -0.21644800 | -0.88849700 |
|                                                                                           |             |             |             | H         | 1.13797000  | -3.20162700 | -0.25281600 |
|                                                                                           |             |             |             | H         | -0.60855900 | -0.94478000 | -1.33285400 |
|                                                                                           |             |             |             | H         | -0.26754300 | -2.48929000 | -2.11872900 |
|                                                                                           |             |             |             | H         | -1.80632300 | -3.70130300 | -0.75696200 |
|                                                                                           |             |             |             | H         | -2.85157600 | -2.98257000 | 1.28389700  |
|                                                                                           |             |             |             | H         | -2.24333800 | -1.31993400 | 1.13619700  |
|                                                                                           |             |             |             | H         | -0.45236500 | -3.78403100 | 1.59649300  |
|                                                                                           |             |             |             | H         | -0.89496100 | -2.55852400 | 2.80957500  |
|                                                                                           |             |             |             | C         | -2.97884900 | -2.02834900 | -1.31787700 |
|                                                                                           |             |             |             | O         | -3.83007300 | -2.71358500 | -1.87183700 |
|                                                                                           |             |             |             | O         | -3.10301900 | -0.70547800 | -1.33235300 |
|                                                                                           |             |             |             | H         | -2.36746400 | -0.16175700 | -0.87303900 |
|                                                                                           |             |             |             | C         | 3.23208700  | 1.41235300  | -0.53359400 |
|                                                                                           |             |             |             | N         | 3.79830800  | 0.22814800  | -0.30242000 |
|                                                                                           |             |             |             | N         | 5.11704200  | 0.35440900  | -0.49708900 |
|                                                                                           |             |             |             | C         | 4.21791500  | 2.31218400  | -0.88026100 |
|                                                                                           |             |             |             | C         | 5.40834500  | 1.65288300  | -0.85956800 |
|                                                                                           |             |             |             | H         | 3.99302600  | 3.34070700  | -1.11564600 |
|                                                                                           |             |             |             | H         | 6.41437900  | 1.97741700  | -1.07048300 |
|                                                                                           |             |             |             | H         | 5.78615300  | -0.40087100 | -0.39049400 |
|                                                                                           |             |             |             | O         | -1.45380000 | 0.89766000  | -0.20521200 |
|                                                                                           |             |             |             | H         | -0.40271800 | 1.34937800  | -0.30961500 |
|                                                                                           |             |             |             | O         | 0.73548700  | 1.91523700  | -0.35373800 |
|                                                                                           |             |             |             | H         | 2.12636600  | 1.63536400  | -0.44840700 |
| <b>(3) Carboxylic group – CF<sub>3</sub>CH<sub>2</sub>OH – H<sub>2</sub>O – Imidazole</b> |             |             |             |           |             |             |             |
| <b>Reactant</b>                                                                           |             |             |             |           |             |             |             |
| C                                                                                         | 0.21177300  | -1.46764900 | 1.40608500  |           |             |             |             |
| C                                                                                         | 1.42049100  | -1.38501500 | 2.35642100  |           |             |             |             |
| C                                                                                         | 2.49341300  | -0.45699600 | 1.75378300  |           |             |             |             |
| C                                                                                         | 2.97341000  | -0.97552700 | 0.36722600  |           |             |             |             |
| C                                                                                         | 1.77529400  | -1.25391700 | -0.57993300 |           |             |             |             |
| C                                                                                         | 0.64591600  | -2.08851400 | 0.05902300  |           |             |             |             |
| C                                                                                         | -0.53532500 | -2.11543300 | -0.93688500 |           |             |             |             |
| C                                                                                         | -1.83377700 | -2.73519400 | -0.34658500 |           |             |             |             |
| C                                                                                         | -2.17880900 | -2.17333900 | 1.06739600  |           |             |             |             |
| C                                                                                         | -0.95731300 | -2.27125300 | 2.00130500  |           |             |             |             |
| H                                                                                         | -0.14437600 | -0.43600600 | 1.21007300  |           |             |             |             |
| H                                                                                         | 1.83456900  | -2.39632600 | 2.51457400  |           |             |             |             |
| H                                                                                         | 1.10131600  | -0.99962400 | 3.33694500  |           |             |             |             |
| H                                                                                         | 3.36137600  | -0.36953400 | 2.42463000  |           |             |             |             |
| H                                                                                         | 2.06414700  | 0.55091700  | 1.63035500  |           |             |             |             |
| H                                                                                         | 3.53790600  | -1.90997100 | 0.52128500  |           |             |             |             |
| H                                                                                         | 2.14455700  | -1.75349500 | -1.48991300 |           |             |             |             |
| H                                                                                         | 1.33943100  | -0.29137800 | -0.88922200 |           |             |             |             |
| H                                                                                         | 0.99645900  | -3.11722100 | 0.25476500  |           |             |             |             |
| H                                                                                         | -0.72080100 | -1.07632100 | -1.24858400 |           |             |             |             |
| H                                                                                         | -0.25187400 | -2.68035700 | -1.83863800 |           |             |             |             |
| H                                                                                         | -1.70867500 | -3.82420200 | -0.26325200 |           |             |             |             |
| H                                                                                         | -3.03371200 | -2.73406100 | 1.47248300  |           |             |             |             |
| H                                                                                         | -2.47812400 | -1.11546700 | 0.99613700  |           |             |             |             |
| H                                                                                         | -0.65639200 | -3.32468700 | 2.13242600  |           |             |             |             |
| H                                                                                         | -1.22134900 | -1.87437400 | 2.99354500  |           |             |             |             |
| C                                                                                         | -3.00035600 | -2.49365000 | -1.27374000 |           |             |             |             |

|                                                                                                           |             |             |             |           |             |             |             |
|-----------------------------------------------------------------------------------------------------------|-------------|-------------|-------------|-----------|-------------|-------------|-------------|
| H                                                                                                         | 0.59102600  | 2.86998500  | -0.31847900 | C         | 2.54249100  | -2.27182000 | 0.26881000  |
| C                                                                                                         | -2.07643500 | 1.46523300  | 0.90713200  | C         | 1.36061300  | -1.98280800 | -0.69948500 |
| H                                                                                                         | -2.79573500 | 0.77441500  | 1.36361300  | C         | 0.06803800  | -2.75863400 | -0.36876300 |
| H                                                                                                         | -1.35382600 | 1.77661300  | 1.67331300  | C         | -1.04316400 | -2.23668400 | -1.30787300 |
| C                                                                                                         | -2.85147700 | 2.69775800  | 0.49792600  | C         | -2.47217500 | -2.72672500 | -0.93031500 |
| F                                                                                                         | -2.06058000 | 3.63717500  | -0.05962800 | C         | -2.76924700 | -2.60735000 | 0.59581200  |
| F                                                                                                         | -3.46565900 | 3.27443000  | 1.55011900  | C         | -1.64310600 | -3.25940800 | 1.42035600  |
| F                                                                                                         | -3.80746800 | 2.41847500  | -0.41053900 | H         | -0.44706000 | -1.46852100 | 1.29135900  |
| <b>Product</b>                                                                                            |             |             |             | H         | 1.05171500  | -4.10539600 | 1.80091300  |
| C                                                                                                         | 0.58155300  | -1.69261900 | 1.27734800  | H         | 0.55043600  | -2.96814700 | 3.07261600  |
| C                                                                                                         | 1.86984100  | -1.73259500 | 2.11979100  | H         | 2.93017100  | -2.49590000 | 2.40113200  |
| C                                                                                                         | 2.84057700  | -0.63261100 | 1.64856300  | H         | 1.86092500  | -1.13417700 | 1.99821100  |
| C                                                                                                         | 3.19803500  | -0.81558400 | 0.14164500  | H         | 2.92844400  | -3.28644400 | 0.07742100  |
| C                                                                                                         | 1.92415600  | -0.95685900 | -0.73753900 | H         | 1.68061600  | -2.20102600 | -1.73116000 |
| C                                                                                                         | 0.91818400  | -1.99565200 | -0.20122500 | H         | 1.12191100  | -0.90772100 | -0.65217000 |
| C                                                                                                         | -0.34564300 | -1.92372600 | -1.08722200 | H         | 0.22132000  | -3.83956200 | -0.53426500 |
| C                                                                                                         | -1.56326100 | -2.71666300 | -0.53940500 | H         | -1.00544100 | -1.13842900 | -1.28080900 |
| C                                                                                                         | -1.79126900 | -2.47550300 | 0.98061300  | H         | -0.82774100 | -2.54194800 | -2.34362600 |
| C                                                                                                         | -0.48984900 | -2.67430600 | 1.78315200  | H         | -2.58194600 | -3.78050000 | -1.22180300 |
| H                                                                                                         | 0.16112700  | -0.66837400 | 1.33300100  | H         | -3.73914700 | -3.08228800 | 0.80389300  |
| H                                                                                                         | 2.34144200  | -2.72620900 | 2.02499200  | H         | -2.84681200 | -1.54798000 | 0.88686600  |
| H                                                                                                         | 1.63235800  | -1.57686800 | 3.18307700  | H         | -1.56156200 | -4.33297200 | 1.17801300  |
| H                                                                                                         | 3.76693200  | -0.63997300 | 2.24125800  | H         | -1.87762600 | -3.17695000 | 2.49264900  |
| H                                                                                                         | 2.36078800  | 0.35022700  | 1.78934500  | C         | -3.50832600 | -1.94219200 | -1.69920700 |
| H                                                                                                         | 3.82535000  | -1.71368300 | 0.03191600  | O         | -4.33496800 | -2.44360100 | -2.44251400 |
| H                                                                                                         | 2.22303500  | -1.21093200 | -1.76659500 | O         | -3.52257800 | -0.61198000 | -1.53029900 |
| H                                                                                                         | 1.40284100  | 0.01385700  | -0.77513500 | H         | -2.80933500 | -0.27998800 | -0.94007200 |
| H                                                                                                         | 1.35780700  | -3.00760900 | -0.25070200 | N         | 3.48551400  | 0.03599200  | 0.08868900  |
| H                                                                                                         | -0.61797600 | -0.86448100 | -1.18752500 | C         | 3.63031500  | -1.27887100 | 0.00910400  |
| H                                                                                                         | -0.10598000 | -2.29303400 | -2.09742400 | N         | 4.89729900  | -1.58675900 | -0.34543000 |
| H                                                                                                         | -1.38982200 | -3.79219900 | -0.69364900 | C         | 4.70961900  | 0.58450700  | -0.23110600 |
| H                                                                                                         | -2.57620200 | -3.16004000 | 1.33649600  | C         | 5.60198800  | -0.41472100 | -0.50328800 |
| H                                                                                                         | -2.15063900 | -1.44655000 | 1.14108600  | H         | 4.87179200  | 1.65258100  | -0.24281900 |
| H                                                                                                         | -0.12352800 | -3.70980900 | 1.67440300  | H         | 6.64254000  | -0.40357900 | -0.78691900 |
| H                                                                                                         | -0.68251000 | -2.50040600 | 2.85318000  | H         | 5.25893500  | -2.52530400 | -0.46725200 |
| C                                                                                                         | -2.82507200 | -2.31341000 | -1.30108000 | O         | -1.57588000 | 0.66830000  | 0.08535900  |
| O                                                                                                         | -3.50152400 | -3.19990200 | -1.87891600 | H         | -0.59941900 | 0.74751600  | 0.04902300  |
| O                                                                                                         | -3.14203500 | -1.07547300 | -1.29920500 | O         | 1.11923000  | 1.18403600  | 0.55745100  |
| H                                                                                                         | -2.29365400 | 0.06354500  | -0.62548500 | H         | 2.01092200  | 0.73168700  | 0.37632900  |
| N                                                                                                         | 3.50160900  | 1.60001100  | -0.47094400 | C         | -2.02502400 | 1.19540100  | 1.30970300  |
| C                                                                                                         | 3.98151600  | 0.36278900  | -0.31909800 | H         | -2.72696400 | 0.50592700  | 1.78951000  |
| N                                                                                                         | 5.28003100  | 0.41040800  | -0.62031600 | H         | -1.19805100 | 1.40860000  | 1.99394300  |
| C                                                                                                         | 4.51309800  | 2.44892900  | -0.87053100 | C         | 1.33177800  | 2.56749800  | 0.65020700  |
| C                                                                                                         | 5.64065400  | 1.69759500  | -0.96728200 | H         | 0.52522400  | 3.03068400  | 1.22581800  |
| H                                                                                                         | 4.34058500  | 3.49722000  | -1.05348300 | H         | 2.29417700  | 2.80978600  | 1.11606000  |
| H                                                                                                         | 6.64939600  | 1.95407800  | -1.24694700 | C         | -2.76503100 | 2.48553800  | 1.04539600  |
| H                                                                                                         | 5.89705500  | -0.39555300 | -0.59113100 | C         | 1.32304900  | 3.18822300  | -0.72901200 |
| O                                                                                                         | -1.81486800 | 0.84060500  | -0.18546400 | F         | -1.98026500 | 3.42606900  | 0.48918600  |
| H                                                                                                         | -0.08396100 | 1.62785100  | -0.07974100 | F         | -3.26538400 | 3.00425200  | 2.18182800  |
| O                                                                                                         | 0.70352800  | 2.16913200  | 0.12232600  | F         | -3.80024600 | 2.30219100  | 0.20241200  |
| H                                                                                                         | 2.51787300  | 1.85786800  | -0.30314100 | F         | 1.46832900  | 4.52542900  | -0.66794400 |
| H                                                                                                         | 0.40317800  | 3.08585100  | 0.06397600  | F         | 0.17829500  | 2.94225200  | -1.39250100 |
| C                                                                                                         | -2.61720500 | 1.34810900  | 0.84488400  | F         | 2.32121300  | 2.71631800  | -1.50299100 |
| H                                                                                                         | -3.35772300 | 0.62044500  | 1.19598300  | <b>TS</b> |             |             |             |
| H                                                                                                         | -1.99812700 | 1.66656800  | 1.69028800  | C         | 0.07320000  | -2.71771000 | 0.97855300  |
| C                                                                                                         | -3.36984800 | 2.56120000  | 0.34927100  | C         | 1.27438700  | -3.15081400 | 1.83682200  |
| F                                                                                                         | -2.53946100 | 3.53972500  | -0.06393600 | C         | 2.42121200  | -2.13822200 | 1.65662600  |
| F                                                                                                         | -4.15132500 | 3.08867500  | 1.31047000  | C         | 2.86860500  | -2.05323700 | 0.16406000  |
| F                                                                                                         | -4.16751700 | 2.27002400  | -0.69658400 | C         | 1.66545800  | -1.87088400 | -0.80432000 |
|                                                                                                           |             |             |             | C         | 0.45360100  | -2.78028100 | -0.51703700 |
|                                                                                                           |             |             |             | C         | -0.70400300 | -2.26370200 | -1.40294900 |
|                                                                                                           |             |             |             | C         | -2.10297600 | -2.84463000 | -1.05030000 |
|                                                                                                           |             |             |             | C         | -2.37603300 | -2.92906400 | 0.48332400  |
|                                                                                                           |             |             |             | C         | -1.18583700 | -3.56508900 | 1.22630000  |
|                                                                                                           |             |             |             | H         | -0.16813000 | -1.66497000 | 1.22950600  |
|                                                                                                           |             |             |             | H         | 1.59984100  | -4.16293200 | 1.54102100  |
| <b>(4) Carboxylic group – CF<sub>3</sub>CH<sub>2</sub>OH – CF<sub>3</sub>CH<sub>2</sub>OH – Imidazole</b> |             |             |             |           |             |             |             |
| <b>Reactant</b>                                                                                           |             |             |             |           |             |             |             |
| C                                                                                                         | -0.31024700 | -2.55464000 | 1.11586700  |           |             |             |             |
| C                                                                                                         | 0.84132100  | -3.04262100 | 2.01351300  |           |             |             |             |
| C                                                                                                         | 2.09517200  | -2.18423000 | 1.75602000  |           |             |             |             |

|                |             |             |             |                                                                                            |             |             |             |
|----------------|-------------|-------------|-------------|--------------------------------------------------------------------------------------------|-------------|-------------|-------------|
| H              | 0.98627200  | -3.18986400 | 2.89866500  | H                                                                                          | -1.56026900 | -4.13779800 | -1.23507100 |
| H              | 3.29160600  | -2.40451500 | 2.27392700  | H                                                                                          | -2.75069600 | -3.85032800 | 0.88320000  |
| H              | 2.06863400  | -1.14650900 | 1.98580000  | H                                                                                          | -2.23262400 | -2.15577700 | 1.01899500  |
| H              | 3.42483900  | -2.96700000 | -0.09273000 | H                                                                                          | -0.33851500 | -4.58928500 | 1.09713400  |
| H              | 2.01576800  | -2.01729000 | -1.83788800 | H                                                                                          | -0.82793900 | -3.59677900 | 2.48969200  |
| H              | 1.30340400  | -0.83487200 | -0.72613600 | C                                                                                          | -2.94150100 | -2.52388600 | -1.54485000 |
| H              | 0.68940300  | -3.82968400 | -0.76491000 | O                                                                                          | -3.64920400 | -3.26067000 | -2.27497800 |
| H              | -0.72325200 | -1.17036000 | -1.29663300 | O                                                                                          | -3.21143500 | -1.29754900 | -1.31080500 |
| H              | -0.48940100 | -2.48279600 | -2.46057000 | H                                                                                          | -2.35356800 | -0.33374800 | -0.41456800 |
| H              | -2.19209000 | -3.85648200 | -1.46938500 | N                                                                                          | 3.58885300  | 0.81095500  | -0.00341700 |
| H              | -3.29800700 | -3.50701000 | 0.64239500  | C                                                                                          | 4.00467900  | -0.45457700 | -0.10443400 |
| H              | -2.54093400 | -1.92139900 | 0.89449800  | N                                                                                          | 5.29840700  | -0.41084600 | -0.42397700 |
| H              | -1.01749300 | -4.59824400 | 0.87700000  | C                                                                                          | 4.63299100  | 1.67397500  | -0.26665000 |
| H              | -1.40713100 | -3.60825500 | 2.30370200  | C                                                                                          | 5.71764100  | 0.90060800  | -0.53171000 |
| C              | -3.18169300 | -1.99731900 | -1.68950000 | H                                                                                          | 4.51446700  | 2.74511400  | -0.23936600 |
| O              | -4.03259100 | -2.45788000 | -2.44149600 | H                                                                                          | 6.73308600  | 1.15742400  | -0.78571500 |
| O              | -3.21010100 | -0.70246500 | -1.39618800 | H                                                                                          | 5.87374000  | -1.23463400 | -0.57335100 |
| H              | -2.47331800 | -0.33894600 | -0.78614100 | O                                                                                          | -1.89034700 | 0.35654600  | 0.16633200  |
| N              | 3.36779300  | 0.39342300  | 0.00502200  | O                                                                                          | -0.10619800 | 0.78005400  | 0.46853400  |
| C              | 3.77179100  | -0.87854800 | 0.00112700  | H                                                                                          | 0.69367200  | 1.25993000  | 0.77238300  |
| N              | 5.10029400  | -0.87340500 | -0.13293100 | H                                                                                          | 2.62472700  | 1.06811200  | 0.23203800  |
| C              | 4.46133000  | 1.22367700  | -0.12723100 | C                                                                                          | -2.74413100 | 0.71766600  | 1.21723300  |
| C              | 5.55895600  | 0.42642900  | -0.21635200 | H                                                                                          | -3.36344700 | -0.11917000 | 1.56124200  |
| H              | 4.36722800  | 2.29759200  | -0.15172100 | H                                                                                          | -2.15795300 | 1.09906000  | 2.05940800  |
| H              | 6.60510700  | 0.65761700  | -0.33377000 | C                                                                                          | 0.38563600  | 2.63083500  | 0.85595400  |
| H              | 5.67167000  | -1.71188500 | -0.17059100 | H                                                                                          | -0.62993100 | 2.81324400  | 1.21944100  |
| O              | -1.52225300 | 0.48759100  | 0.13367300  | H                                                                                          | 1.10233600  | 3.11679100  | 1.52237800  |
| H              | -0.39662300 | 0.79837300  | 0.15222700  | C                                                                                          | -3.67732500 | 1.82301500  | 0.77360000  |
| O              | 0.78763500  | 1.17429600  | 0.25091700  | C                                                                                          | 0.52032900  | 3.27414300  | -0.50640400 |
| H              | 2.35317900  | 0.68926600  | 0.09215200  | F                                                                                          | -3.01427600 | 2.91855100  | 0.35439200  |
| C              | -2.11401500 | 0.80847700  | 1.35585100  | F                                                                                          | -4.49015200 | 2.21282700  | 1.77415900  |
| H              | -2.72222100 | -0.01477000 | 1.75344500  | F                                                                                          | -4.46532500 | 1.44068000  | -0.25042400 |
| H              | -1.37024100 | 1.08630800  | 2.11488000  | F                                                                                          | 0.27123400  | 4.59411000  | -0.45228900 |
| C              | 0.85298000  | 2.53241300  | 0.55718600  | F                                                                                          | -0.32243000 | 2.74365900  | -1.41138800 |
| H              | 0.02697600  | 2.87391400  | 1.19547000  | F                                                                                          | 1.76371000  | 3.12365300  | -1.00901000 |
| H              | 1.79666400  | 2.79122200  | 1.05938700  |                                                                                            |             |             |             |
| C              | -3.04864400 | 1.98616300  | 1.18547500  |                                                                                            |             |             |             |
| C              | 0.79754500  | 3.36600300  | -0.70333300 |                                                                                            |             |             |             |
| F              | -3.64575000 | 2.32195100  | 2.34665100  |                                                                                            |             |             |             |
| F              | -4.03258300 | 1.72371100  | 0.30092600  |                                                                                            |             |             |             |
| F              | -2.41957800 | 3.08838100  | 0.73352400  |                                                                                            |             |             |             |
| F              | 0.86000600  | 4.68669000  | -0.43382600 |                                                                                            |             |             |             |
| F              | -0.33419600 | 3.16189100  | -1.40620900 |                                                                                            |             |             |             |
| F              | 1.81931600  | 3.09060300  | -1.54209900 |                                                                                            |             |             |             |
| <b>Product</b> |             |             |             | <b>(5) Carboxylic group – H<sub>2</sub>O – CH<sub>2</sub>FCH<sub>2</sub>OH – Imidazole</b> |             |             |             |
| C              | 0.48757100  | -2.57890300 | 1.08727900  | <b>Reactant</b>                                                                            |             |             |             |
| C              | 1.76658700  | -2.85814600 | 1.89717300  | C                                                                                          | -1.12791900 | -0.91647300 | 1.40975300  |
| C              | 2.79878600  | -1.74325600 | 1.64279000  | C                                                                                          | -0.08083900 | -1.64986400 | 2.26688200  |
| C              | 3.15793800  | -1.65683600 | 0.12818400  | C                                                                                          | 1.30896900  | -1.48207600 | 1.62506500  |
| C              | 1.88765800  | -1.55830100 | -0.76352100 | C                                                                                          | 1.34415500  | -2.06194900 | 0.17963900  |
| C              | 0.80726000  | -2.60600800 | -0.42510800 | C                                                                                          | 0.15675800  | -1.55236900 | -0.68441200 |
| C              | -0.45207100 | -2.26602900 | -1.25177400 | C                                                                                          | -1.21733800 | -1.58492500 | 0.01919500  |
| C              | -1.69990500 | -3.10735600 | -0.87480700 | C                                                                                          | -2.22019100 | -0.83376300 | -0.88455500 |
| C              | -1.92792000 | -3.15325400 | 0.66355000  | C                                                                                          | -3.60328600 | -0.60266600 | -0.21455300 |
| C              | -0.64306700 | -3.57390500 | 1.40474100  | C                                                                                          | -3.47530700 | -0.01767100 | 1.22464000  |
| H              | 0.13227800  | -1.55967600 | 1.34097500  | C                                                                                          | -2.51732600 | -0.87932800 | 2.07036500  |
| H              | 2.18067000  | -3.83927000 | 1.60686800  | H                                                                                          | -0.78322000 | 0.12842200  | 1.26753600  |
| H              | 1.53201400  | -2.89967000 | 2.97172000  | H                                                                                          | -0.34623800 | -2.71898300 | 2.34007300  |
| H              | 3.71946800  | -1.91344700 | 2.21951000  | H                                                                                          | -0.07154400 | -1.23907900 | 3.28807900  |
| H              | 2.36978900  | -0.78149400 | 1.97081500  | H                                                                                          | 2.08878000  | -1.97548500 | 2.22452700  |
| H              | 3.73863600  | -2.54909600 | -0.15123500 | H                                                                                          | 1.55017100  | -0.40685200 | 1.58588700  |
| H              | 2.18528400  | -1.64520000 | -1.82009800 | H                                                                                          | 1.30104300  | -3.16148900 | 0.24608700  |
| H              | 1.43141300  | -0.56339500 | -0.63140300 | H                                                                                          | 0.11759400  | -2.13933200 | -1.61598400 |
| H              | 1.16888300  | -3.61738700 | -0.68134100 | H                                                                                          | 0.35498700  | -0.50772700 | -0.96553900 |
| H              | -0.67115700 | -1.20009100 | -1.09354300 | H                                                                                          | -1.54987900 | -2.62792400 | 0.16355400  |
| H              | -0.23856700 | -2.40041200 | -2.32439600 | H                                                                                          | -1.76344300 | 0.13292200  | -1.14494200 |
|                |             |             |             | H                                                                                          | -2.36659200 | -1.38927700 | -1.82398600 |
|                |             |             |             | H                                                                                          | -4.13833600 | -1.56082900 | -0.15088300 |
|                |             |             |             | H                                                                                          | -4.47503800 | 0.02387100  | 1.68133800  |
|                |             |             |             | H                                                                                          | -3.08453500 | 1.01130800  | 1.18364300  |
|                |             |             |             | H                                                                                          | -2.91128500 | -1.90577600 | 2.16561400  |
|                |             |             |             | H                                                                                          | -2.43982200 | -0.45729100 | 3.08396800  |
|                |             |             |             | C                                                                                          | -4.44816800 | 0.31857600  | -1.06119700 |



|           |             |             |             |                                                                                  |             |             |             |
|-----------|-------------|-------------|-------------|----------------------------------------------------------------------------------|-------------|-------------|-------------|
| O         | -5.55868300 | 0.02652600  | -1.47714100 | H                                                                                | 2.10432900  | 0.40142300  | -0.05209500 |
| O         | -3.94960700 | 1.52366200  | -1.35299200 | C                                                                                | 1.85649100  | 2.49023100  | 0.99386900  |
| H         | -3.04809800 | 1.70596800  | -0.98174500 | H                                                                                | 1.27842800  | 2.96220900  | 1.80189800  |
| N         | 2.93893500  | -0.42984100 | -0.85103500 | H                                                                                | 2.76802300  | 2.06833000  | 1.44424400  |
| C         | 2.62953900  | -1.66175300 | -0.47364000 | C                                                                                | 2.24928400  | 3.54195000  | -0.02517200 |
| N         | 3.66071600  | -2.50136900 | -0.71880800 | F                                                                                | 3.02565800  | 4.53147100  | 0.60572700  |
| C         | 4.22106200  | -0.49220200 | -1.35573800 | H                                                                                | 2.85763900  | 3.10889600  | -0.82494300 |
| C         | 4.68700400  | -1.77556800 | -1.28029700 | H                                                                                | 1.36999000  | 4.03625000  | -0.44790900 |
| H         | 4.72356500  | 0.38283700  | -1.74240200 | <b>Product</b>                                                                   |             |             |             |
| H         | 5.62112000  | -2.22989800 | -1.57110600 | C                                                                                | -0.84222900 | -0.72734100 | 1.48302700  |
| H         | 3.66656900  | -3.49325000 | -0.51172400 | C                                                                                | 0.29956100  | -1.06536900 | 2.45849700  |
| O         | -1.55051100 | 2.47231300  | -0.47713700 | C                                                                                | 1.65948700  | -0.87505200 | 1.76143000  |
| H         | -1.64104200 | 2.73168800  | 0.44995200  | C                                                                                | 1.76899300  | -1.77960200 | 0.49590900  |
| H         | -0.67402600 | 2.04401300  | -0.53695700 | C                                                                                | 0.54101600  | -1.61250900 | -0.44553800 |
| O         | 1.19128600  | 1.67493600  | -0.45452500 | C                                                                                | -0.81593000 | -1.70024800 | 0.28312900  |
| H         | 1.82039200  | 0.91997300  | -0.63440700 | C                                                                                | -1.91965900 | -1.33474100 | -0.73428300 |
| C         | 1.72042600  | 2.44641700  | 0.60974300  | C                                                                                | -3.33005300 | -1.16800600 | -0.11170400 |
| H         | 0.91393200  | 3.06851900  | 1.01192000  | C                                                                                | -3.29825000 | -0.27477200 | 1.16170600  |
| H         | 2.09502500  | 1.80346800  | 1.41644000  | C                                                                                | -2.22553600 | -0.76029800 | 2.15743400  |
| C         | 2.84381300  | 3.32139100  | 0.08787700  | H                                                                                | -0.67420000 | 0.29668500  | 1.09230100  |
| F         | 3.36805100  | 4.06649300  | 1.15633200  | H                                                                                | 0.19113200  | -2.10593300 | 2.80979900  |
| H         | 3.65816900  | 2.71665700  | -0.32272500 | H                                                                                | 0.24865700  | -0.41028400 | 3.34189600  |
| H         | 2.48374200  | 4.02943000  | -0.66253800 | H                                                                                | 2.49187200  | -1.10936500 | 2.44064700  |
| <b>TS</b> |             |             |             | H                                                                                | 1.75970500  | 0.18171800  | 1.46315100  |
| C         | -1.34637600 | -1.65913000 | 0.96486600  | H                                                                                | 1.84785800  | -2.82997000 | 0.81538900  |
| C         | -0.44075700 | -2.77289000 | 1.51758900  | H                                                                                | 0.59612200  | -2.37065500 | -1.24230800 |
| C         | 1.02662400  | -2.41240000 | 1.21868800  | H                                                                                | 0.59126900  | -0.62189800 | -0.92585200 |
| C         | 1.27586200  | -2.27673200 | -0.31735200 | H                                                                                | -0.97306300 | -2.72327400 | 0.66764700  |
| C         | 0.20051200  | -1.40272600 | -1.02658000 | H                                                                                | -1.62807600 | -0.38743100 | -1.21138100 |
| C         | -1.25750500 | -1.63922700 | -0.57572800 | H                                                                                | -1.96344000 | -2.10017900 | -1.52625600 |
| C         | -2.09008400 | -0.47539600 | -1.16448500 | H                                                                                | -3.72097800 | -2.15751800 | 0.17000000  |
| C         | -3.51431700 | -0.30614300 | -0.56218700 | H                                                                                | -4.29556900 | -0.27939000 | 1.62752200  |
| C         | -3.57104100 | -0.50787800 | 0.98331900  | H                                                                                | -3.07009400 | 0.76507300  | 0.87494100  |
| C         | -2.81544200 | -1.78415300 | 1.40224000  | H                                                                                | -2.44903300 | -1.78912000 | 2.48986900  |
| H         | -0.96253000 | -0.69171300 | 1.34498900  | H                                                                                | -2.22350200 | -0.11613400 | 3.05051400  |
| H         | -0.70753700 | -3.73930200 | 1.05654900  | C                                                                                | -4.27496300 | -0.53533300 | -1.13427200 |
| H         | -0.57867200 | -2.87088400 | 2.60524300  | O                                                                                | -5.35717800 | -1.12235100 | -1.40683300 |
| H         | 1.71875500  | -3.16407700 | 1.62507800  | O                                                                                | -3.91827000 | 0.57324300  | -1.64491600 |
| H         | 1.25268600  | -1.45047700 | 1.70832000  | H                                                                                | -2.44673600 | 1.49454100  | -1.22699000 |
| H         | 1.29639200  | -3.28351600 | -0.76062000 | N                                                                                | 3.21302500  | -0.26273600 | -0.88500400 |
| H         | 0.29085600  | -1.54448300 | -2.11491600 | C                                                                                | 3.00404400  | -1.42109200 | -0.25333200 |
| H         | 0.41703200  | -0.34533700 | -0.81694000 | N                                                                                | 4.10570200  | -2.15499900 | -0.41422400 |
| H         | -1.62894000 | -2.60776100 | -0.95151700 | C                                                                                | 4.46771600  | -0.26159100 | -1.45951000 |
| H         | -1.51613700 | 0.44517100  | -0.99378500 | C                                                                                | 5.03547600  | -1.45915900 | -1.16162000 |
| H         | -2.18317000 | -0.60074800 | -2.25485600 | H                                                                                | 4.83830400  | 0.58046300  | -2.02154500 |
| H         | -4.19325600 | -1.03743900 | -1.02287200 | H                                                                                | 5.99787700  | -1.87575500 | -1.41049000 |
| H         | -4.62643300 | -0.55285300 | 1.29023100  | H                                                                                | 4.22352500  | -3.08931700 | -0.03450200 |
| H         | -3.11361500 | 0.35272900  | 1.49509400  | O                                                                                | -1.66752100 | 2.08321500  | -1.08282500 |
| H         | -3.27272600 | -2.67531500 | 0.93914600  | H                                                                                | -1.80426600 | 2.48144300  | -0.21215000 |
| H         | -2.87622700 | -1.90624600 | 2.49457400  | H                                                                                | 0.18774700  | 1.67882300  | -1.06837700 |
| C         | -4.03881000 | 1.07746600  | -0.89581300 | O                                                                                | 1.13451300  | 1.78340600  | -0.84268100 |
| O         | -5.11556900 | 1.24526600  | -1.47049200 | H                                                                                | 2.51778600  | 0.49679600  | -0.92510200 |
| O         | -3.31416900 | 2.11581100  | -0.53786700 | C                                                                                | 1.21601300  | 2.58715400  | 0.32597600  |
| H         | -2.37859600 | 1.97637600  | -0.00186900 | H                                                                                | 0.50502500  | 2.24396200  | 1.08829800  |
| N         | 2.85571300  | -0.33299200 | -0.33220500 | H                                                                                | 2.22985500  | 2.48660300  | 0.72446800  |
| C         | 2.60509300  | -1.62953500 | -0.52033900 | C                                                                                | 0.93923000  | 4.03691000  | -0.02360400 |
| N         | 3.75660700  | -2.21866500 | -0.85830800 | F                                                                                | 1.03377500  | 4.79477000  | 1.15457500  |
| C         | 4.19595200  | -0.09405200 | -0.55197300 | H                                                                                | 1.67611200  | 4.42812900  | -0.72897400 |
| C         | 4.76975800  | -1.28121300 | -0.88705800 | H                                                                                | -0.07080000 | 4.16939900  | -0.42052000 |
| H         | 4.62507900  | 0.89118800  | -0.45825200 |                                                                                  |             |             |             |
| H         | 5.78465000  | -1.54067900 | -1.14093700 |                                                                                  |             |             |             |
| H         | 3.85157400  | -3.20802700 | -1.06477700 |                                                                                  |             |             |             |
| O         | -1.20626700 | 2.06611200  | 0.71571300  | <b>(6) Carboxylic group – CH<sub>2</sub>FCH<sub>2</sub>OH – H<sub>2</sub>O –</b> |             |             |             |
| H         | -1.39484800 | 1.84018000  | 1.63619600  | <b>Imidazole</b>                                                                 |             |             |             |
| H         | -0.08665500 | 1.73392700  | 0.50194700  | <b>Reactant</b>                                                                  |             |             |             |
| O         | 1.10541500  | 1.48175000  | 0.35783600  | C                                                                                | -0.24656200 | -1.06803900 | 1.42778200  |
|           |             |             |             | C                                                                                | 0.94685000  | -1.18539200 | 2.39227300  |

|           |             |             |             |                |             |             |             |
|-----------|-------------|-------------|-------------|----------------|-------------|-------------|-------------|
| C         | 2.18218200  | -0.50263000 | 1.77623600  | H              | 1.06028800  | -0.26712400 | -0.92162000 |
| C         | 2.56207700  | -1.14469700 | 0.41008400  | H              | 0.23136200  | -3.06750100 | -0.01702100 |
| C         | 1.33754200  | -1.22448700 | -0.54227600 | H              | -0.97988300 | -0.60601100 | -1.35639200 |
| C         | 0.06963300  | -1.81426700 | 0.11232000  | H              | -0.96057800 | -2.25566700 | -1.99134700 |
| C         | -1.09159200 | -1.67193600 | -0.89653600 | H              | -2.74328400 | -2.98207000 | -0.57694100 |
| C         | -2.48652400 | -2.00902600 | -0.29411000 | H              | -3.64771400 | -1.85800100 | 1.34709200  |
| C         | -2.72650200 | -1.31843000 | 1.08249700  | H              | -2.69409700 | -0.38679100 | 1.06913500  |
| C         | -1.55325600 | -1.60191600 | 2.03952900  | H              | -1.48426000 | -3.12087900 | 1.81459000  |
| H         | -0.39263300 | 0.00445800  | 1.18793500  | H              | -1.67335800 | -1.72057200 | 2.89657800  |
| H         | 1.15576100  | -2.25047200 | 2.59388900  | C              | -3.52224100 | -1.16409800 | -1.34374600 |
| H         | 0.70063700  | -0.70824500 | 3.35337000  | O              | -4.47894800 | -1.72157800 | -1.87572000 |
| H         | 3.04673000  | -0.56384000 | 2.45441700  | O              | -3.36765000 | 0.14175500  | -1.48099900 |
| H         | 1.95866200  | 0.56545200  | 1.61917700  | H              | -2.53348300 | 0.60216400  | -1.03091700 |
| H         | 2.94067800  | -2.16318600 | 0.59716100  | N              | 3.22361400  | 0.99070700  | -0.60164800 |
| H         | 1.61301900  | -1.81197600 | -1.43313900 | C              | 3.54038300  | -0.26081800 | -0.26886200 |
| H         | 1.09107500  | -0.20733700 | -0.88460900 | N              | 4.85553000  | -0.41555200 | -0.46000700 |
| H         | 0.22870000  | -2.88010100 | 0.35283500  | C              | 4.36556000  | 1.64590600  | -1.01154400 |
| H         | -1.08289000 | -0.63449600 | -1.26149900 | C              | 5.39834600  | 0.76444100  | -0.92551400 |
| H         | -0.91337300 | -2.32559500 | -1.76463300 | H              | 4.34857000  | 2.67539200  | -1.33266600 |
| H         | -2.56595100 | -3.09639400 | -0.15415200 | H              | 6.44784400  | 0.86327500  | -1.15061200 |
| H         | -3.67596600 | -1.68322400 | 1.50140300  | H              | 5.36070900  | -1.27850200 | -0.28675200 |
| H         | -2.81717600 | -0.22831600 | 0.95032700  | O              | -1.53536200 | 1.48094800  | -0.46469800 |
| H         | -1.46267600 | -2.68624900 | 2.22398500  | H              | -0.38582300 | 1.67159900  | -0.51565900 |
| H         | -1.74232500 | -1.11421500 | 3.00822000  | O              | 0.83290100  | 1.96974900  | -0.50996900 |
| C         | -3.58018300 | -1.60263200 | -1.25260900 | H              | 2.20083900  | 1.41620700  | -0.55488800 |
| O         | -4.43531000 | -2.36446200 | -1.67444000 | H              | 0.88417100  | 2.93466200  | -0.49074600 |
| O         | -3.61437300 | -0.32126900 | -1.63811800 | C              | -2.05885200 | 2.17961100  | 0.64328800  |
| H         | -2.87950400 | 0.23237300  | -1.27500000 | H              | -3.07693300 | 1.82740700  | 0.85412700  |
| N         | 3.49652600  | 0.88771100  | -0.71802300 | H              | -1.44725800 | 2.00797600  | 1.54181100  |
| C         | 3.64183400  | -0.33782000 | -0.23707300 | C              | -2.10255600 | 3.66454700  | 0.33605600  |
| N         | 4.92099500  | -0.75523400 | -0.38197100 | F              | -2.64550900 | 4.33925800  | 1.44369000  |
| C         | 4.73926700  | 1.26262500  | -1.18651000 | H              | -1.10132000 | 4.07046300  | 0.16521800  |
| C         | 5.63828500  | 0.25194600  | -0.98577800 | H              | -2.74534600 | 3.87311400  | -0.52314900 |
| H         | 4.90751500  | 2.22977100  | -1.63812900 | <b>Product</b> |             |             |             |
| H         | 6.68882800  | 0.15523400  | -1.21060400 | C              | -0.22747500 | -1.09258400 | 1.42383100  |
| H         | 5.27901100  | -1.65748500 | -0.09142300 | C              | 0.96561000  | -1.19605700 | 2.39045000  |
| O         | -1.81108500 | 1.57960900  | -0.81956200 | C              | 2.19551700  | -0.49484700 | 1.78467800  |
| H         | -0.83204700 | 1.60490200  | -0.82282800 | C              | 2.58015500  | -1.14032000 | 0.41842800  |
| O         | 0.93917800  | 2.15017000  | -0.57633200 | C              | 1.36193700  | -1.21119000 | -0.54538400 |
| H         | 1.84185100  | 1.74968700  | -0.63260100 | C              | 0.10054900  | -1.82064400 | 0.10073300  |
| H         | 1.06986400  | 3.10728700  | -0.58591500 | C              | -1.06382900 | -1.67295000 | -0.90372600 |
| C         | -2.27551700 | 2.29711700  | 0.31554000  | C              | -2.45655100 | -2.04232800 | -0.32346800 |
| H         | -3.33890800 | 2.06916700  | 0.43281500  | C              | -2.69972800 | -1.38841600 | 1.06515400  |
| H         | -1.74582200 | 1.98155800  | 1.22283700  | C              | -1.52562200 | -1.65762400 | 2.02652300  |
| C         | -2.08964300 | 3.78524600  | 0.09066100  | H              | -0.39499000 | -0.02097300 | 1.19180200  |
| F         | -2.59447600 | 4.46225900  | 1.21127400  | H              | 1.18940700  | -2.25818300 | 2.59055400  |
| H         | -1.03281200 | 4.04901700  | -0.00576200 | H              | 0.71329400  | -0.72310700 | 3.35174600  |
| H         | -2.64724100 | 4.12819200  | -0.78414900 | H              | 3.05881800  | -0.54944200 | 2.46373800  |
| <b>TS</b> |             |             |             | H              | 1.95921700  | 0.57059800  | 1.62737700  |
| C         | -0.20176400 | -1.43142500 | 1.31878400  | H              | 2.96681000  | -2.15487400 | 0.60079700  |
| C         | 1.00653300  | -1.71091300 | 2.22851500  | H              | 1.64568900  | -1.78353100 | -1.44260300 |
| C         | 2.20994800  | -0.89048500 | 1.72690800  | H              | 1.10356400  | -0.19085800 | -0.87168200 |
| C         | 2.58047800  | -1.27246700 | 0.25962000  | H              | 0.27307100  | -2.88720100 | 0.32862200  |
| C         | 1.34301900  | -1.30292200 | -0.68353100 | H              | -1.08103900 | -0.62442800 | -1.23554800 |
| C         | 0.08419400  | -1.97681300 | -0.09812800 | H              | -0.86813100 | -2.29463900 | -1.79251800 |
| C         | -1.07806400 | -1.66206800 | -1.07147900 | H              | -2.52010600 | -3.13536100 | -0.21012800 |
| C         | -2.50704600 | -1.91145700 | -0.50379700 | H              | -3.64397100 | -1.77172000 | 1.48183200  |
| C         | -2.67825200 | -1.48435900 | 0.98580300  | H              | -2.81120400 | -0.29952700 | 0.94076200  |
| C         | -1.51936000 | -2.01849000 | 1.84807100  | H              | -1.41131700 | -2.74162800 | 2.20108300  |
| H         | -0.32582800 | -0.33229100 | 1.24917200  | H              | -1.72315800 | -1.18379000 | 3.00087900  |
| H         | 1.23958700  | -2.78977400 | 2.22230600  | C              | -3.54660300 | -1.58382900 | -1.29127900 |
| H         | 0.77416100  | -1.42625600 | 3.26618700  | O              | -4.34863900 | -2.43592300 | -1.75577800 |
| H         | 3.09283900  | -1.03851900 | 2.36576100  | O              | -3.59181600 | -0.34195600 | -1.57138800 |
| H         | 1.94290400  | 0.17879000  | 1.76625500  | H              | -2.47220900 | 0.84105200  | -1.08560000 |
| H         | 3.07165700  | -2.25745100 | 0.26637100  | N              | 3.50839200  | 0.88484000  | -0.73759500 |
| H         | 1.63032200  | -1.78917200 | -1.62909200 | C              | 3.65861500  | -0.33574800 | -0.21655700 |

|   |             |             |             |           |             |             |             |
|---|-------------|-------------|-------------|-----------|-------------|-------------|-------------|
| N | 4.94623200  | -0.65806100 | -0.34805800 | H         | -1.50584800 | 1.91297200  | 1.74590800  |
| C | 4.72163400  | 1.34788600  | -1.20453600 | C         | 1.31065600  | 2.85468000  | 0.45330300  |
| C | 5.63368200  | 0.37198000  | -0.95849300 | H         | 0.59153000  | 3.31645300  | 1.13811900  |
| H | 4.82640000  | 2.31689000  | -1.66516800 | H         | 2.32080900  | 3.03640500  | 0.84016000  |
| H | 6.69027500  | 0.31408600  | -1.16271900 | C         | -2.41509000 | 3.46383200  | 0.54463100  |
| H | 5.34666100  | -1.53737200 | -0.03423300 | C         | 1.16804700  | 3.45573600  | -0.93146000 |
| O | -1.89966400 | 1.61943900  | -0.85560300 | F         | -2.97859000 | 4.11046800  | 1.65550000  |
| H | 0.00306400  | 1.82814300  | -0.72789200 | F         | 1.38190300  | 4.84044300  | -0.84373100 |
| O | 0.89780200  | 2.18403600  | -0.56054700 | H         | 1.91142900  | 3.04977600  | -1.62331800 |
| H | 2.61020800  | 1.38918300  | -0.75968300 | H         | 0.16099300  | 3.30089700  | -1.32978900 |
| H | 0.83377400  | 3.12622900  | -0.76553700 | H         | -1.47619700 | 3.97180200  | 0.30802400  |
| C | -2.42084000 | 2.24897100  | 0.30391200  | H         | -3.11672200 | 3.56418500  | -0.28748400 |
| H | -3.47529600 | 1.98646900  | 0.44763000  | <b>TS</b> |             |             |             |
| H | -1.86006400 | 1.94302500  | 1.19824500  | C         | -0.48921700 | -2.14764500 | 1.11674500  |
| C | -2.28609200 | 3.74459700  | 0.10974000  | C         | 0.66245400  | -2.70719000 | 1.96929400  |
| F | -2.70965600 | 4.38377800  | 1.28510200  | C         | 1.95491200  | -1.94164700 | 1.62887500  |
| H | -1.24475000 | 4.03095500  | -0.06394800 | C         | 2.32489300  | -2.10024900 | 0.12095300  |
| H | -2.91670300 | 4.10241100  | -0.70767500 | C         | 1.11658400  | -1.82678100 | -0.82116100 |

**(7) Carboxylic group – CH<sub>2</sub>FCH<sub>2</sub>OH – CH<sub>2</sub>FCH<sub>2</sub>OH – Imidazole**

**Reactant**

|   |             |             |             |   |             |             |             |
|---|-------------|-------------|-------------|---|-------------|-------------|-------------|
| C | -0.46827900 | -1.96885200 | 1.23709800  | C | -1.86908900 | -2.69502400 | 1.51514300  |
| C | 0.69312900  | -2.46225500 | 2.11849900  | H | -0.50751000 | -1.04770600 | 1.25013100  |
| C | 1.99559600  | -1.75279900 | 1.70090000  | H | 0.78553900  | -3.78666400 | 1.77527500  |
| C | 2.33620200  | -2.01518700 | 0.20450800  | H | 0.43678000  | -2.58385200 | 3.03942500  |
| C | 1.11932200  | -1.74039900 | -0.72209800 | H | 2.80143400  | -2.28685300 | 2.24002900  |
| C | -0.20477600 | -2.36439600 | -0.23442100 | H | 1.79496700  | -0.87354700 | 1.85114000  |
| C | -1.33039000 | -1.85060900 | -1.16034600 | H | 2.70855300  | -3.11828000 | -0.04262800 |
| C | -2.76295700 | -2.18113800 | -0.65197100 | H | 1.37437100  | -2.16496800 | -1.83681700 |
| C | -2.95065900 | -1.85242000 | 0.86039000  | H | 0.95190800  | -0.74057600 | -0.87139700 |
| C | -1.83353300 | -2.50863900 | 1.69379400  | H | -0.20601500 | -3.54333000 | -0.50336500 |
| H | -0.49975400 | -0.86200500 | 1.29508100  | H | -1.10651900 | -0.73940000 | -1.31713100 |
| H | 0.79711800  | -3.55651800 | 2.01377700  | H | -1.22720600 | -2.20724000 | -2.29605300 |
| H | 0.47884300  | -2.24975300 | 3.17739500  | H | -3.11153100 | -3.04038700 | -1.08234100 |
| H | 2.84282600  | -2.08018600 | 2.32225700  | H | -3.96214200 | -2.26372200 | 1.02537500  |
| H | 1.87106500  | -0.66845300 | 1.85504900  | H | -2.88964300 | -0.84946100 | 1.06015200  |
| H | 2.64335500  | -3.06792500 | 0.09540800  | H | -1.93008700 | -3.77100900 | 1.27737000  |
| H | 1.35553200  | -2.09839500 | -1.73705900 | H | -2.02266700 | -2.58386300 | 2.59970200  |
| H | 0.96560700  | -0.65162900 | -0.78862200 | C | -3.69329300 | -1.03486100 | -1.45870000 |
| H | -0.14993500 | -3.46608600 | -0.28698800 | O | -4.68730000 | -1.37189900 | -2.09750100 |
| H | -1.20716800 | -0.76129300 | -1.25029000 | O | -3.40690500 | 0.24833000  | -1.32569600 |
| H | -1.20448300 | -2.27596000 | -2.16830300 | H | -2.54422700 | 0.52646200  | -0.78415400 |
| H | -2.96140200 | -3.25179300 | -0.79965800 | N | 3.20080000  | 0.19778000  | -0.31600000 |
| H | -3.94150800 | -2.20493100 | 1.18157600  | C | 3.39626800  | -1.11679400 | -0.21066100 |
| H | -2.91568200 | -0.76220400 | 1.01950900  | N | 4.69711800  | -1.35123700 | -0.41016000 |
| H | -1.86048200 | -3.60537800 | 1.57435200  | C | 4.40442900  | 0.81367200  | -0.58654000 |
| H | -1.99020600 | -2.28603800 | 2.76021300  | C | 5.35355700  | -0.15966700 | -0.64563900 |
| C | -3.79188500 | -1.42309900 | -1.45677600 | H | 4.48525600  | 1.88130700  | -0.71845500 |
| O | -4.71130300 | -1.95492900 | -2.05818800 | H | 6.41296200  | -0.11841000 | -0.83956300 |
| O | -3.69072100 | -0.08880600 | -1.48573200 | H | 5.12038400  | -2.27374700 | -0.39095100 |
| H | -2.91337800 | 0.27206400  | -0.99148800 | O | -1.49125900 | 1.17245700  | -0.04334900 |
| N | 3.40427200  | 0.19327400  | -0.27616300 | H | -0.32005400 | 1.22727400  | -0.01838500 |
| C | 3.46772400  | -1.12830100 | -0.20889800 | O | 0.91054900  | 1.36338300  | 0.08685300  |
| N | 4.70294500  | -1.55811500 | -0.55097100 | O | 2.22779600  | 0.67372800  | -0.17550900 |
| C | 4.65387600  | 0.61892200  | -0.67554600 | C | -2.03229600 | 1.82209700  | 1.08704200  |
| C | 5.47571700  | -0.45974200 | -0.85310900 | H | -2.92556300 | 1.28863400  | 1.43986900  |
| H | 4.87984500  | 1.66646700  | -0.81463600 | H | -1.30301200 | 1.83677700  | 1.90935000  |
| H | 6.50615400  | -0.54725100 | -1.15960400 | C | 1.23017400  | 2.70675900  | 0.36856300  |
| H | 4.99845600  | -2.52706500 | -0.57616200 | H | 0.55018700  | 3.13512900  | 1.11951800  |
| O | -1.70120600 | 1.31624500  | -0.23557300 | H | 2.24995000  | 2.77555400  | 0.77697600  |
| H | -0.72804600 | 1.23410500  | -0.15737200 | C | -2.42228500 | 3.23907100  | 0.71028900  |
| O | 1.03739100  | 1.46386500  | 0.39105100  | C | 1.14980500  | 3.52431300  | -0.90629600 |
| H | 1.87612100  | 0.99601200  | 0.11801300  | F | -2.98574700 | 3.87219600  | 1.83201500  |
| C | -2.20023000 | 2.00645000  | 0.90324200  | F | 1.44186300  | 4.86882100  | -0.61147800 |
| H | -3.15729900 | 1.55571500  | 1.18704600  | H | -1.55535500 | 3.83031500  | 0.40092600  |

|                                                                                                            |             |             |             |           |             |             |             |
|------------------------------------------------------------------------------------------------------------|-------------|-------------|-------------|-----------|-------------|-------------|-------------|
| H                                                                                                          | -3.17773800 | 3.23881700  | -0.08088800 | C         | 1.00320800  | -2.50749100 | 1.73344600  |
| H                                                                                                          | 1.88345800  | 3.18218300  | -1.64246400 | C         | 1.27660000  | -2.86578700 | 0.24221900  |
| H                                                                                                          | 0.14411300  | 3.49390400  | -1.33664700 | C         | 0.24322600  | -2.19969500 | -0.70840300 |
| <b>Product</b>                                                                                             |             |             |             | C         | -1.22629300 | -2.34962100 | -0.26048800 |
| C                                                                                                          | -0.36538400 | -1.54005600 | 1.44734100  | C         | -2.08873100 | -1.47132800 | -1.19450300 |
| C                                                                                                          | 0.83454900  | -1.76454800 | 2.38491400  | C         | -3.56556700 | -1.32847500 | -0.73091300 |
| C                                                                                                          | 2.11510100  | -1.21098300 | 1.73276800  | C         | -3.68637500 | -0.98694700 | 0.78577700  |
| C                                                                                                          | 2.39102500  | -1.90558900 | 0.36377400  | C         | -2.86229500 | -1.97759700 | 1.62985200  |
| C                                                                                                          | 1.14159900  | -1.89891600 | -0.56230600 | H         | -1.05654200 | -0.84769300 | 1.28541900  |
| C                                                                                                          | -0.16094800 | -2.33707300 | 0.13816300  | H         | -0.72257800 | -3.82409800 | 1.98576100  |
| C                                                                                                          | -1.32806200 | -2.08108000 | -0.83937800 | H         | -0.63204400 | -2.49804400 | 3.16701200  |
| C                                                                                                          | -2.72876600 | -2.30328100 | -0.21516200 | H         | 1.67882100  | -3.09634900 | 2.37188800  |
| C                                                                                                          | -2.87100400 | -1.57667600 | 1.15331000  | H         | 1.23477800  | -1.44167500 | 1.89417100  |
| C                                                                                                          | -1.70447400 | -1.93247100 | 2.09754800  | H         | 1.22066700  | -3.96111600 | 0.13050100  |
| H                                                                                                          | -0.40655000 | -0.46153600 | 1.18909200  | H         | 0.37317700  | -2.61059500 | -1.72241100 |
| H                                                                                                          | 0.94436500  | -2.84281400 | 2.59346200  | H         | 0.45810800  | -1.12156200 | -0.76311400 |
| H                                                                                                          | 0.66476800  | -1.25599100 | 3.34616900  | H         | -1.54378100 | -3.40466600 | -0.33461900 |
| H                                                                                                          | 2.98847600  | -1.35249500 | 2.38604500  | H         | -1.61169400 | -0.48129800 | -1.23784200 |
| H                                                                                                          | 1.98917100  | -0.12731700 | 1.57234300  | H         | -2.07535700 | -1.88393300 | -2.21528900 |
| H                                                                                                          | 2.70764900  | -2.94308400 | 0.55124400  | H         | -4.09482200 | -2.27394700 | -0.91450900 |
| H                                                                                                          | 1.34063900  | -2.54535000 | -1.43130200 | H         | -4.74836100 | -1.01062700 | 1.07176400  |
| H                                                                                                          | 0.97998100  | -0.87714200 | -0.93902100 | H         | -3.31181200 | 0.03205000  | 0.97542400  |
| H                                                                                                          | -0.11207400 | -3.40986600 | 0.39594900  | H         | -3.23946700 | -3.00531900 | 1.49181600  |
| H                                                                                                          | -1.24680700 | -1.04020600 | -1.18569900 | H         | -2.96490600 | -1.72640200 | 2.69658400  |
| H                                                                                                          | -1.22040100 | -2.73014100 | -1.72380600 | C         | -4.27319400 | -0.26293300 | -1.53399400 |
| H                                                                                                          | -2.88458500 | -3.38046100 | -0.05103400 | O         | -5.30682100 | -0.45560400 | -2.15366400 |
| H                                                                                                          | -3.83625100 | -1.85025300 | 1.60601200  | O         | -3.74250900 | 0.96630800  | -1.54070600 |
| H                                                                                                          | -2.87739700 | -0.48674800 | 0.99146100  | H         | -2.90219000 | 1.05697400  | -1.02975100 |
| H                                                                                                          | -1.70459700 | -3.01531100 | 2.31201100  | N         | 3.01948400  | -1.14021600 | -0.25067600 |
| H                                                                                                          | -1.82491100 | -1.40486000 | 3.05633300  | C         | 2.64987600  | -2.40724000 | -0.13340700 |
| C                                                                                                          | -3.81461000 | -1.79371600 | -1.16057900 | N         | 3.69980900  | -3.22342200 | -0.37152000 |
| O                                                                                                          | -4.76359500 | -2.56118500 | -1.46803800 | C         | 4.35962800  | -1.15361600 | -0.57645400 |
| O                                                                                                          | -3.71334200 | -0.59424600 | -1.57887700 | C         | 4.79989700  | -2.44539600 | -0.65619700 |
| H                                                                                                          | -2.53559800 | 0.49612900  | -1.13878500 | H         | 4.91766600  | -0.24182700 | -0.73305200 |
| N                                                                                                          | 3.42563100  | 0.03717000  | -0.84105700 | H         | 5.76341500  | -2.87343200 | -0.88392400 |
| C                                                                                                          | 3.50453300  | -1.18954600 | -0.31760100 | H         | 3.66819800  | -4.23569300 | -0.34452500 |
| N                                                                                                          | 4.75966400  | -1.60478700 | -0.49354000 | O         | -1.40730000 | 1.66326900  | -0.24318800 |
| C                                                                                                          | 4.65011900  | 0.40810700  | -1.35822000 | H         | -0.50870200 | 1.28197700  | -0.27865300 |
| C                                                                                                          | 5.49671300  | -0.63113600 | -1.13872100 | O         | 1.28762700  | 0.84812800  | 0.24910700  |
| H                                                                                                          | 4.80541700  | 1.36486200  | -1.83033600 | H         | 1.93369100  | 0.09744800  | 0.03435400  |
| H                                                                                                          | 6.53831200  | -0.76786000 | -1.37935200 | H         | -1.57878200 | 2.29869900  | 1.01823200  |
| H                                                                                                          | 5.10574400  | -2.51024700 | -0.18978300 | C         | -2.61264100 | 2.14519600  | 1.34313700  |
| O                                                                                                          | -1.95054400 | 1.25747300  | -0.87023800 | H         | -0.90711600 | 1.85989900  | 1.76504200  |
| H                                                                                                          | -0.07978600 | 1.30156700  | -0.76687800 | C         | 2.02591400  | 1.94594200  | 0.71322300  |
| O                                                                                                          | 0.86805900  | 1.47444200  | -0.59473200 | H         | 1.40565700  | 2.56918100  | 1.36424800  |
| H                                                                                                          | 2.56309200  | 0.59702800  | -0.84572100 | H         | 2.92542600  | 1.64162400  | 1.26142300  |
| C                                                                                                          | -2.64793700 | 2.02615400  | 0.09735500  | C         | -1.30317500 | 3.78236400  | 0.86777400  |
| H                                                                                                          | -3.69953900 | 1.72041900  | 0.14504900  | C         | 2.47222100  | 2.79976000  | -0.45282500 |
| H                                                                                                          | -2.20353200 | 1.89058100  | 1.09252300  | F         | -1.46696200 | 4.39008600  | 2.12252900  |
| C                                                                                                          | 0.98624900  | 2.43987100  | 0.44254900  | F         | 3.11167800  | 3.90914100  | -0.03686900 |
| H                                                                                                          | 0.02725500  | 2.58917500  | 0.95015700  | F         | 1.43884100  | 3.20081400  | -1.21796600 |
| H                                                                                                          | 1.71363400  | 2.08261300  | 1.17999300  | F         | 3.31668800  | 2.13852300  | -1.26977200 |
| C                                                                                                          | -2.55497500 | 3.48124300  | -0.31030100 | H         | -0.27803400 | 3.97260500  | 0.53910500  |
| C                                                                                                          | 1.47325000  | 3.73997100  | -0.16583900 | H         | -2.01108600 | 4.24934700  | 0.17841000  |
| F                                                                                                          | -3.14964600 | 4.26392600  | 0.69175300  | <b>TS</b> |             |             |             |
| F                                                                                                          | 1.63259000  | 4.68152500  | 0.86254600  | C         | -0.66402800 | -2.54486700 | 0.91088200  |
| H                                                                                                          | 2.44659200  | 3.60759000  | -0.64667100 | C         | 0.43980000  | -3.29865500 | 1.67292400  |
| H                                                                                                          | 0.75325300  | 4.14675300  | -0.88075500 | C         | 1.76931900  | -2.53514400 | 1.52213700  |
| H                                                                                                          | -1.51389000 | 3.80348100  | -0.40535200 | C         | 2.18038100  | -2.41864200 | 0.02117300  |
| H                                                                                                          | -3.09247300 | 3.67221800  | -1.24247300 | C         | 1.01760800  | -1.90332600 | -0.87355100 |
|                                                                                                            |             |             |             | C         | -0.35325800 | -2.55682200 | -0.60176600 |
|                                                                                                            |             |             |             | C         | -1.39846900 | -1.73511100 | -1.39315000 |
|                                                                                                            |             |             |             | C         | -2.88104300 | -2.00013500 | -1.00064900 |
|                                                                                                            |             |             |             | C         | -3.11134700 | -2.16193100 | 0.53448800  |
|                                                                                                            |             |             |             | C         | -2.07111700 | -3.11440000 | 1.15466000  |
|                                                                                                            |             |             |             | H         | -0.65873200 | -1.49168900 | 1.25520200  |
| <b>(8) Carboxylic group – CH<sub>2</sub>FCH<sub>2</sub>OH – CF<sub>3</sub>CH<sub>2</sub>OH – Imidazole</b> |             |             |             |           |             |             |             |
| <b>Reactant</b>                                                                                            |             |             |             |           |             |             |             |
| C                                                                                                          | -1.38378100 | -1.90504300 | 1.21109100  |           |             |             |             |
| C                                                                                                          | -0.46966200 | -2.75666700 | 2.10945300  |           |             |             |             |

|                |             |             |             |                                                                                                  |             |             |             |
|----------------|-------------|-------------|-------------|--------------------------------------------------------------------------------------------------|-------------|-------------|-------------|
| H              | 0.53479900  | -4.32561000 | 1.28057000  | H                                                                                                | -1.05857600 | -1.89816700 | -2.35129100 |
| H              | 0.17987700  | -3.37169900 | 2.74015400  | H                                                                                                | -2.74088000 | -3.35093600 | -1.35677600 |
| H              | 2.58201000  | -3.02773800 | 2.07535800  | H                                                                                                | -3.79699400 | -2.98074900 | 0.81255300  |
| H              | 1.64220700  | -1.52378900 | 1.94309300  | H                                                                                                | -2.90525600 | -1.46457400 | 1.06687300  |
| H              | 2.51750600  | -3.40499600 | -0.33067200 | H                                                                                                | -1.61014000 | -4.26042500 | 0.89078500  |
| H              | 1.29861300  | -2.03165800 | -1.93063300 | H                                                                                                | -1.84747700 | -3.30661300 | 2.37340500  |
| H              | 0.88906800  | -0.82466100 | -0.69774400 | C                                                                                                | -3.70940600 | -1.43667400 | -1.48994300 |
| H              | -0.35397000 | -3.60689900 | -0.94116900 | O                                                                                                | -4.58414000 | -1.92954200 | -2.24835400 |
| H              | -1.15998100 | -0.67455000 | -1.23385600 | O                                                                                                | -3.67562100 | -0.20765700 | -1.15322100 |
| H              | -1.28349800 | -1.92963000 | -2.47086400 | H                                                                                                | -2.52172700 | 0.44780200  | -0.15062800 |
| H              | -3.22585300 | -2.91943500 | -1.49399500 | N                                                                                                | 3.42565800  | 0.18511800  | 0.10442300  |
| H              | -4.13327200 | -2.53588800 | 0.69363900  | C                                                                                                | 3.54111200  | -1.12656100 | -0.11596700 |
| H              | -3.03125500 | -1.18410300 | 1.03577900  | N                                                                                                | 4.80273000  | -1.34633700 | -0.48722500 |
| H              | -2.15138200 | -4.12105600 | 0.70897800  | C                                                                                                | 4.63120400  | 0.81228700  | -0.13244300 |
| H              | -2.25914400 | -3.21102200 | 2.23477400  | C                                                                                                | 5.50596400  | -0.15757200 | -0.50673300 |
| C              | -3.74784100 | -0.86253900 | -1.49993000 | H                                                                                                | 4.75974200  | 1.87603600  | -0.01232100 |
| O              | -4.71705900 | -1.04300400 | -2.23405600 | H                                                                                                | 6.54643300  | -0.11315300 | -0.78416500 |
| O              | -3.44534600 | 0.35961100  | -1.10195300 | H                                                                                                | 5.17337200  | -2.26242800 | -0.72178600 |
| H              | -2.59776500 | 0.49968800  | -0.47739200 | O                                                                                                | -1.90975100 | 0.92922600  | 0.47445100  |
| N              | 3.20203900  | -0.13273300 | 0.05156000  | H                                                                                                | -0.09370700 | 0.99471400  | 0.74758800  |
| C              | 3.31192100  | -1.45547200 | -0.09036000 | O                                                                                                | 0.79102200  | 1.34065100  | 0.99562200  |
| N              | 4.60209700  | -1.72680600 | -0.30088200 | H                                                                                                | 2.55167500  | 0.63327400  | 0.40308200  |
| C              | 4.44724100  | 0.44803400  | -0.07229300 | C                                                                                                | -2.70094700 | 1.66642000  | 1.38964200  |
| C              | 5.33534700  | -0.55699400 | -0.29633900 | H                                                                                                | -3.53665800 | 1.05968800  | 1.76119500  |
| H              | 4.59363200  | 1.51372200  | 0.00306100  | H                                                                                                | -2.06926200 | 1.94284600  | 2.24013900  |
| H              | 6.40137600  | -0.54856100 | -0.45519400 | C                                                                                                | 0.75216400  | 2.74368200  | 0.88407700  |
| H              | 4.97144400  | -2.66185600 | -0.44315300 | H                                                                                                | -0.21161800 | 3.16133600  | 1.19326900  |
| O              | -1.55755500 | 0.93475300  | 0.39676600  | H                                                                                                | 1.54839800  | 3.17621700  | 1.49461100  |
| H              | -0.38527500 | 0.99837600  | 0.40484500  | C                                                                                                | -3.22756100 | 2.91251200  | 0.70404100  |
| O              | 0.83879300  | 1.13917300  | 0.51631700  | C                                                                                                | 1.00252700  | 3.15317000  | -0.55053500 |
| H              | 2.28372800  | 0.36533400  | 0.22524600  | F                                                                                                | -3.96842300 | 3.66016100  | 1.63317300  |
| C              | -2.08449500 | 1.59565600  | 1.52724500  | F                                                                                                | 0.96649000  | 4.48907700  | -0.69462400 |
| H              | -2.85721400 | 0.98148300  | 2.00981000  | F                                                                                                | 0.09345700  | 2.63361300  | -1.39643400 |
| H              | -1.29298600 | 1.77527100  | 2.26738400  | F                                                                                                | 2.21062100  | 2.73871500  | -0.98660000 |
| C              | 1.12990400  | 2.48372300  | 0.73855500  | H                                                                                                | -2.40883100 | 3.54420900  | 0.34682000  |
| H              | 0.35824600  | 3.00174500  | 1.32620100  | H                                                                                                | -3.89592700 | 2.65944300  | -0.12390300 |
| H              | 2.09279800  | 2.61441100  | 1.25201700  |                                                                                                  |             |             |             |
| C              | -2.68885000 | 2.91740100  | 1.09112400  |                                                                                                  |             |             |             |
| C              | 1.23736200  | 3.22511300  | -0.57537600 |                                                                                                  |             |             |             |
| F              | -3.18765500 | 3.58808100  | 2.22128300  |                                                                                                  |             |             |             |
| F              | 1.52171000  | 4.53109400  | -0.39554300 |                                                                                                  |             |             |             |
| F              | 0.09556100  | 3.16708200  | -1.29126700 |                                                                                                  |             |             |             |
| F              | 2.20623200  | 2.71967900  | -1.36816100 |                                                                                                  |             |             |             |
| H              | -1.94048900 | 3.56580200  | 0.62585400  |                                                                                                  |             |             |             |
| H              | -3.52735200 | 2.76276100  | 0.40589900  |                                                                                                  |             |             |             |
| <b>Product</b> |             |             |             | <b>(9) Carboxylic group – CF<sub>3</sub>CH<sub>2</sub>OH – CH<sub>2</sub>FCH<sub>2</sub>OH –</b> |             |             |             |
| C              | -0.35251200 | -2.49267700 | 1.01850100  | <b>Imidazole</b>                                                                                 |             |             |             |
| C              | 0.84057400  | -3.11624200 | 1.76575100  | <b>Reactant</b>                                                                                  |             |             |             |
| C              | 2.09575000  | -2.24469200 | 1.56637200  | C                                                                                                | 0.39740300  | -2.33430800 | 1.15883700  |
| C              | 2.44422500  | -2.11750100 | 0.05258500  | C                                                                                                | 1.68188800  | -2.55931500 | 1.97720300  |
| C              | 1.21677100  | -1.65166700 | -0.78127200 | C                                                                                                | 2.71711700  | -1.47230000 | 1.62391900  |
| C              | -0.06349000 | -2.46346400 | -0.49952500 | C                                                                                                | 3.06270500  | -1.48401800 | 0.10534600  |
| C              | -1.22415900 | -1.79245000 | -1.26682500 | C                                                                                                | 1.78063800  | -1.47286900 | -0.77167900 |
| C              | -2.62858300 | -2.34979100 | -0.91300300 | C                                                                                                | 0.71109400  | -2.50006600 | -0.34552900 |
| C              | -2.83942500 | -2.47186800 | 0.62392800  | C                                                                                                | -0.54229700 | -2.25175000 | -1.21333400 |
| C              | -1.67457100 | -3.23282000 | 1.28859600  | C                                                                                                | -1.80856800 | -3.01278200 | -0.72880900 |
| H              | -0.46596700 | -1.44610800 | 1.36494800  | C                                                                                                | -2.03091300 | -2.88372600 | 0.80963800  |
| H              | 1.01968500  | -4.13828800 | 1.38948700  | C                                                                                                | -0.74815900 | -3.27498400 | 1.56972200  |
| H              | 0.61569100  | -3.19165100 | 2.84036400  | H                                                                                                | 0.06058100  | -1.29120700 | 1.32651200  |
| H              | 2.96137300  | -2.66407500 | 2.09947700  | H                                                                                                | 2.08611300  | -3.56355500 | 1.76064700  |
| H              | 1.90124400  | -1.24013300 | 1.97897700  | H                                                                                                | 1.45501300  | -2.51892900 | 3.05363600  |
| H              | 2.79535200  | -3.09271400 | -0.31741600 | H                                                                                                | 3.64352900  | -1.60147400 | 2.20322400  |
| H              | 1.47124300  | -1.69831500 | -1.85178700 | H                                                                                                | 2.29536300  | -0.48744000 | 1.88517900  |
| H              | 0.99690000  | -0.59752300 | -0.54098800 | H                                                                                                | 3.64664400  | -2.39183100 | -0.11701800 |
| H              | 0.06648100  | -3.50419000 | -0.84505900 | H                                                                                                | 2.06431200  | -1.63433500 | -1.82413200 |
| H              | -1.19249300 | -0.71706200 | -1.03894000 | H                                                                                                | 1.31876500  | -0.47437900 | -0.70590800 |
|                |             |             |             | H                                                                                                | 1.08272500  | -3.52741000 | -0.50473800 |
|                |             |             |             | H                                                                                                | -0.73196300 | -1.16900300 | -1.20393700 |
|                |             |             |             | H                                                                                                | -0.33357800 | -2.53533200 | -2.25662200 |
|                |             |             |             | H                                                                                                | -1.70989800 | -4.07952300 | -0.97370000 |
|                |             |             |             | H                                                                                                | -2.87537100 | -3.52500300 | 1.10093200  |
|                |             |             |             | H                                                                                                | -2.29298200 | -1.84495100 | 1.07194900  |
|                |             |             |             | H                                                                                                | -0.47460900 | -4.32028400 | 1.34382400  |
|                |             |             |             | H                                                                                                | -0.92534400 | -3.20341200 | 2.65364400  |

|           |             |             |             |                |             |             |             |
|-----------|-------------|-------------|-------------|----------------|-------------|-------------|-------------|
| C         | -3.03219500 | -2.50275900 | -1.45209900 | H              | 4.14695000  | 2.82046700  | -0.68792800 |
| O         | -3.79737400 | -3.21081400 | -2.08518600 | H              | 6.51046700  | 1.36004300  | -0.78020400 |
| O         | -3.29397800 | -1.19132200 | -1.36574400 | H              | 5.78983400  | -1.04243400 | -0.31159000 |
| H         | -2.61778400 | -0.68566100 | -0.86039600 | O              | -1.46081000 | 0.58777700  | -0.06914700 |
| N         | 3.43364600  | 0.96775300  | -0.20233100 | O              | -0.36036700 | 0.96516300  | -0.07960200 |
| C         | 3.88368700  | -0.27780700 | -0.22593700 | O              | 0.79951500  | 1.43860000  | -0.00984600 |
| N         | 5.19075400  | -0.29684000 | -0.57063300 | H              | 2.24466800  | 1.09591700  | -0.16977400 |
| C         | 4.49867100  | 1.77233900  | -0.54780600 | C              | -2.06918200 | 0.98781200  | 1.12127200  |
| C         | 5.60294500  | 0.99986200  | -0.78087400 | H              | -2.66159500 | 0.18220100  | 1.57478000  |
| H         | 4.40470600  | 2.84733000  | -0.60639100 | H              | -1.33883000 | 1.33699800  | 1.86354600  |
| H         | 6.61375300  | 1.24231000  | -1.06900400 | C              | 0.75069200  | 2.82879800  | 0.21776900  |
| H         | 5.75751600  | -1.13138000 | -0.66573100 | H              | 0.01808400  | 3.08534700  | 0.99584600  |
| O         | -1.62906700 | 0.58324200  | 0.02447400  | H              | 1.73109600  | 3.18959200  | 0.56378300  |
| H         | -0.67393800 | 0.81357100  | 0.08951100  | C              | -3.03063800 | 2.12740900  | 0.86233700  |
| O         | 0.88083600  | 1.55441600  | 0.58990000  | C              | 0.38040900  | 3.54369500  | -1.06768400 |
| H         | 1.80038600  | 1.30152800  | 0.28139100  | F              | -3.64288600 | 2.52671600  | 1.99523200  |
| C         | -2.30612500 | 1.11996000  | 1.13465400  | F              | -4.00226000 | 1.78270500  | -0.00730000 |
| H         | -2.96967300 | 0.36887700  | 1.57535600  | F              | -2.42574600 | 3.21334300  | 0.34023100  |
| H         | -1.61529400 | 1.49081300  | 1.89819200  | F              | 0.25816700  | 4.92113500  | -0.80774200 |
| C         | 0.76078200  | 2.96440900  | 0.47553000  | H              | 1.15494600  | 3.42250900  | -1.83047300 |
| H         | -0.08240800 | 3.28450900  | 1.09522000  | H              | -0.58235400 | 3.19499500  | -1.45145500 |
| H         | 1.66881900  | 3.46224900  | 0.83729700  | <b>Product</b> |             |             |             |
| C         | -3.16937300 | 2.27307500  | 0.67672000  | C              | 0.73157000  | -2.30517300 | 1.10067700  |
| C         | 0.50501200  | 3.33198900  | -0.97374100 | C              | 2.05081000  | -2.47605300 | 1.87566100  |
| F         | -2.44937400 | 3.28080000  | 0.14863600  | C              | 2.98745500  | -1.28814900 | 1.58057300  |
| F         | -3.88082600 | 2.78530100  | 1.69690800  | C              | 3.29237600  | -1.18622500 | 0.05527800  |
| F         | -4.04803700 | 1.89357400  | -0.27108200 | C              | 1.99001800  | -1.20366000 | -0.79840800 |
| F         | 0.26392100  | 4.71278300  | -1.04923400 | C              | 1.01133600  | -2.33283700 | -0.41853300 |
| H         | 1.37281700  | 3.11331700  | -1.60294200 | C              | -0.29000200 | -2.11473900 | -1.22171700 |
| H         | -0.37936300 | 2.81822000  | -1.36041000 | C              | -1.46864000 | -3.02615000 | -0.78728200 |
| <b>TS</b> |             |             |             | C              | -1.64602900 | -3.05758400 | 0.75821300  |
| C         | 0.32703100  | -2.38282000 | 1.11140500  | C              | -0.31254600 | -3.37592100 | 1.46376600  |
| C         | 1.57161300  | -2.60260200 | 1.98787000  | H              | 0.30823300  | -1.31136700 | 1.35080400  |
| C         | 2.61009200  | -1.51046300 | 1.66821600  | H              | 2.53001800  | -3.42670200 | 1.58433800  |
| C         | 3.03981300  | -1.57007500 | 0.17023800  | H              | 1.85062700  | -2.52128200 | 2.95677600  |
| C         | 1.81967900  | -1.62195000 | -0.79359400 | H              | 3.93529600  | -1.38001100 | 2.13022200  |
| C         | 0.69282800  | -2.58953300 | -0.37471700 | H              | 2.49320500  | -0.36141100 | 1.91619300  |
| C         | -0.51471200 | -2.28203000 | -1.29079600 | H              | 3.93714600  | -2.02808000 | -0.23902400 |
| C         | -1.86140500 | -2.91408400 | -0.83627100 | H              | 2.26276000  | -1.27562600 | -1.86298000 |
| C         | -2.10137500 | -2.84341900 | 0.70432500  | H              | 1.45876300  | -0.24701500 | -0.65915800 |
| C         | -0.85220200 | -3.29603800 | 1.48386800  | H              | 1.45077800  | -3.31494900 | -0.66721800 |
| H         | -0.00030600 | -1.33213700 | 1.24484900  | H              | -0.58103600 | -1.06191900 | -1.09713800 |
| H         | 1.99247100  | -3.60568200 | 1.80036400  | H              | -0.09191500 | -2.27225400 | -2.29408600 |
| H         | 1.29848300  | -2.55037300 | 3.05289900  | H              | -1.27559400 | -4.05294300 | -1.13339300 |
| H         | 3.50523000  | -1.60657800 | 2.29981700  | H              | -2.41256800 | -3.80530800 | 1.01338500  |
| H         | 2.15732400  | -0.52607300 | 1.87476900  | H              | -2.00787900 | -2.07681900 | 1.10827100  |
| H         | 3.67497900  | -2.45606000 | 0.01910300  | H              | 0.05611600  | -4.36966300 | 1.15556800  |
| H         | 2.17726800  | -1.86937200 | -1.80542200 | H              | -0.46177100 | -3.39944000 | 2.55421500  |
| H         | 1.36911800  | -0.61958200 | -0.84356700 | C              | -2.76581200 | -2.53239700 | -1.42373000 |
| H         | 1.01549700  | -3.63683000 | -0.50245700 | O              | -3.44789100 | -3.32199800 | -2.12399500 |
| H         | -0.61497600 | -1.18866400 | -1.32623300 | O              | -3.10504000 | -1.32394100 | -1.19211300 |
| H         | -0.29840700 | -2.61968400 | -2.31615300 | H              | -2.25193100 | -0.28868200 | -0.33827200 |
| H         | -1.88648100 | -3.97080200 | -1.13699600 | N              | 3.50069300  | 1.30575200  | -0.04088100 |
| H         | -2.97140200 | -3.46893800 | 0.95185100  | C              | 4.01445400  | 0.08618100  | -0.21992200 |
| H         | -2.34108200 | -1.81065400 | 1.00129100  | N              | 5.25350200  | 0.25202600  | -0.68395500 |
| H         | -0.60570500 | -4.34548900 | 1.24666000  | C              | 4.42557100  | 2.26351200  | -0.40003400 |
| H         | -1.05281500 | -3.23680800 | 2.56448100  | C              | 5.53804900  | 1.59819000  | -0.80734200 |
| C         | -3.01265200 | -2.21824600 | -1.52907800 | H              | 4.21207200  | 3.31851200  | -0.33644000 |
| O         | -3.86723700 | -2.81507900 | -2.17211700 | H              | 6.48953000  | 1.95193100  | -1.16904200 |
| O         | -3.10608500 | -0.89829700 | -1.40032600 | H              | 5.87838400  | -0.51464900 | -0.91451300 |
| H         | -2.37668200 | -0.42767100 | -0.86639300 | O              | -1.80378800 | 0.43902000  | 0.20171500  |
| N         | 3.31584400  | 0.87640400  | -0.27013300 | O              | 0.03458300  | 0.93859600  | 0.65305900  |
| C         | 3.83039900  | -0.34787800 | -0.15260200 | H              | 0.74053300  | 1.56225800  | 0.91354400  |
| N         | 5.15042800  | -0.25502100 | -0.34420500 | H              | 2.54081600  | 1.46840400  | 0.29689900  |
| C         | 4.33222900  | 1.76762800  | -0.54371100 | C              | -2.69614800 | 0.88716100  | 1.18416200  |
| C         | 5.49273900  | 1.05910000  | -0.59180200 | H              | -3.31504900 | 0.07816100  | 1.59040700  |

|   |             |            |             |           |             |             |             |
|---|-------------|------------|-------------|-----------|-------------|-------------|-------------|
| H | -2.14108300 | 1.35984700 | 2.00036400  | C         | -2.55737400 | -2.26765400 | -1.62166000 |
| C | 0.29882000  | 2.87568300 | 0.59100600  | C         | -3.37198200 | -1.02538500 | 0.29369600  |
| H | -0.67203000 | 3.08714400 | 1.05252000  | C         | -3.47950300 | -3.27695500 | -1.35468900 |
| H | 1.03680900  | 3.57326800 | 0.99634800  | H         | -1.86862100 | -2.34162000 | -2.45827100 |
| C | -3.63038300 | 1.92892100 | 0.60729700  | C         | -4.29701600 | -2.03878900 | 0.54543900  |
| C | 0.20844600  | 3.02769000 | -0.91538100 | H         | -3.31517400 | -0.15098400 | 0.93658400  |
| F | -2.96809900 | 2.97731300 | 0.08048100  | C         | -4.35491400 | -3.16857000 | -0.27222000 |
| F | -4.46024600 | 2.41854200 | 1.54824800  | H         | -3.51394000 | -4.15233100 | -1.99658900 |
| F | -4.40077200 | 1.43235200 | -0.38077200 | H         | -4.97154200 | -1.94438100 | 1.39147100  |
| F | -0.25252600 | 4.32102600 | -1.20122900 | H         | -5.07360800 | -3.95560600 | -0.06771300 |
| H | 1.18853100  | 2.91265600 | -1.38730200 | <b>TS</b> |             |             |             |
| H | -0.50396200 | 2.31863700 | -1.34641400 | C         | -1.26093700 | -2.37063900 | 1.06849200  |

**(10) Carboxylic group – CF<sub>3</sub>CH<sub>2</sub>OH – C<sub>6</sub>H<sub>5</sub>OH – Imidazole**  
**Reactant**

|   |             |             |             |   |             |             |             |
|---|-------------|-------------|-------------|---|-------------|-------------|-------------|
| C | 1.93248700  | 1.69198900  | 1.20677500  | C | -1.04412100 | -2.77774300 | -0.40683200 |
| C | 1.24705600  | 2.69878500  | 2.14728400  | C | -1.89739500 | -1.89909600 | -1.35644400 |
| C | -0.23043300 | 2.85997800  | 1.73861000  | C | -3.37520400 | -1.68200900 | -0.91097900 |
| C | -0.35727300 | 3.36627700  | 0.27051000  | C | -3.55172300 | -1.47162300 | 0.62467000  |
| C | 0.48504900  | 2.49988300  | -0.70106200 | C | -2.74830400 | -2.50567600 | 1.43329900  |
| C | 1.93415600  | 2.24229000  | -0.23585100 | H | -0.97921600 | -1.30474700 | 1.17566600  |
| C | 2.55895200  | 1.22650600  | -1.22041200 | H | -0.51260800 | -4.27079700 | 1.82551800  |
| C | 3.91392800  | 0.62332800  | -0.74610500 | H | -0.54561600 | -2.96686200 | 3.03654400  |
| C | 3.90405300  | 0.20184100  | 0.75536800  | H | 1.82745800  | -3.37796400 | 2.31943100  |
| C | 3.36371800  | 1.33927300  | 1.64244200  | H | 1.27666100  | -1.75439900 | 1.84064300  |
| H | 1.33185900  | 0.76248400  | 1.21273700  | H | 1.52206300  | -4.25167400 | 0.05547800  |
| H | 1.76847300  | 3.67037000  | 2.09461000  | H | 0.62191800  | -2.94727100 | -1.81837000 |
| H | 1.30766500  | 2.34398200  | 3.18756700  | H | 0.57776800  | -1.46654300 | -0.84268200 |
| H | -0.75316500 | 3.55880600  | 2.40843200  | H | -1.32197300 | -3.84080300 | -0.51042300 |
| H | -0.73237500 | 1.87991100  | 1.82133400  | H | -1.39455400 | -0.92492400 | -1.42139900 |
| H | -0.00674100 | 4.41060100  | 0.23107500  | H | -1.89651700 | -2.32966600 | -2.37013400 |
| H | 0.48290200  | 2.96770900  | -1.69850500 | H | -3.97763500 | -2.55318600 | -1.20430200 |
| H | 0.00262800  | 1.51548300  | -0.80013500 | H | -4.62491800 | -1.52591800 | 0.86069100  |
| H | 2.51416800  | 3.18140700  | -0.24402700 | H | -3.20413900 | -0.46648300 | 0.90486800  |
| H | 1.82474700  | 0.42091900  | -1.36526400 | H | -3.09849900 | -3.52994000 | 1.21740400  |
| H | 2.71063600  | 1.70402900  | -2.20080000 | H | -2.89387000 | -2.32337600 | 2.50951800  |
| H | 4.71072900  | 1.36536700  | -0.89200400 | C | -3.94990400 | -0.46682600 | -1.61001800 |
| H | 4.92643800  | -0.07749100 | 1.04889400  | O | -4.97057800 | -0.49882900 | -2.28951400 |
| H | 3.26622900  | -0.68568600 | 0.89686500  | O | -3.31060600 | 0.67990100  | -1.43091900 |
| H | 4.01046700  | 2.23006400  | 1.56445000  | H | -2.41292900 | 0.65579400  | -0.90576100 |
| H | 3.36898000  | 1.01551900  | 2.69486800  | N | 3.08731000  | -1.29343300 | -0.36326000 |
| C | 4.25997000  | -0.58002200 | -1.59066900 | C | 2.82090800  | -2.58278300 | -0.12392300 |
| O | 5.27736100  | -0.68296800 | -2.25416200 | N | 3.98781700  | -3.23222200 | -0.13708700 |
| O | 3.39300900  | -1.60435000 | -1.58208000 | C | 4.44671500  | -1.12511200 | -0.52583900 |
| H | 2.58163200  | -1.43695500 | -1.05279200 | C | 5.01973800  | -2.34913200 | -0.38485100 |
| N | -2.45151100 | 2.23110800  | -0.51552600 | H | 4.88247200  | -0.16032200 | -0.73395000 |
| C | -1.79526400 | 3.31943200  | -0.13871700 | H | 6.04727400  | -2.66987200 | -0.44040800 |
| N | -2.63691100 | 4.37615800  | -0.10121600 | H | 4.08143800  | -4.23168500 | 0.01665400  |
| C | -3.76083100 | 2.61295900  | -0.72258000 | O | -1.15693800 | 0.99108000  | -0.12859000 |
| C | -3.89283000 | 3.94911600  | -0.46912500 | H | -0.07893100 | 0.82443100  | -0.46949800 |
| H | -4.51342800 | 1.90812400  | -1.04619700 | O | 1.13235900  | 0.66009300  | -0.75288000 |
| H | -4.73610200 | 4.61958200  | -0.52035000 | H | 2.36935500  | -0.55298400 | -0.43183500 |
| H | -2.37638600 | 5.32163900  | 0.15475900  | C | -1.14575300 | 1.44847700  | 1.19247500  |
| O | 0.83145800  | -1.46296500 | -0.31827100 | H | -1.85740600 | 0.90364300  | 1.82457900  |
| H | 0.08820500  | -0.95376900 | -0.70218900 | H | -0.14492800 | 1.36160600  | 1.63969500  |
| O | -1.55579400 | -0.19151200 | -1.05972600 | C | -1.53856200 | 2.90897800  | 1.25250300  |
| H | -1.87875300 | 0.73906100  | -0.77208500 | F | -0.65283700 | 3.71296700  | 0.63343400  |
| C | 0.53097800  | -1.75089700 | 1.02703800  | F | -1.63116000 | 3.33938300  | 2.52785200  |
| H | 1.36712800  | -1.47546600 | 1.67736500  | F | -2.73541000 | 3.13513000  | 0.67221200  |
| H | -0.37586900 | -1.23778700 | 1.36538500  | C | 1.77473300  | 1.84393400  | -0.65269100 |
| C | 0.31681800  | -3.23855200 | 1.18360900  | C | 1.44688000  | 2.90966700  | -1.50902100 |
| F | -0.76146600 | -3.68411600 | 0.51623400  | C | 2.77489200  | 2.03603300  | 0.31537300  |
| F | 0.14708400  | -3.56971500 | 2.47783800  | C | 2.09508200  | 4.13749600  | -1.38810600 |
| F | 1.37136300  | -3.94269400 | 0.72840700  | H | 0.67055800  | 2.75897300  | -2.25565500 |
| C | -2.50130200 | -1.14329000 | -0.79446200 | C | 3.42547300  | 3.26610000  | 0.42435600  |

|                |             |             |             |
|----------------|-------------|-------------|-------------|
| H              | 3.02216800  | 1.21834400  | 0.99092800  |
| C              | 3.08930300  | 4.32499400  | -0.42294100 |
| H              | 1.82363800  | 4.95335200  | -2.05341500 |
| H              | 4.19470300  | 3.39937700  | 1.18103700  |
| H              | 3.59372600  | 5.28243400  | -0.33224300 |
| <b>Product</b> |             |             |             |
| C              | 0.40448800  | -2.32117400 | 1.36935500  |
| C              | 1.68487800  | -2.40957500 | 2.21965100  |
| C              | 2.76815700  | -1.48220200 | 1.63613000  |
| C              | 3.10067400  | -1.88591400 | 0.16708200  |
| C              | 1.81877200  | -1.96422900 | -0.70859200 |
| C              | 0.69199300  | -2.80261300 | -0.07203100 |
| C              | -0.56810400 | -2.64801200 | -0.95075000 |
| C              | -1.83431700 | -3.30786200 | -0.34625300 |
| C              | -2.03825900 | -2.89621500 | 1.13877600  |
| C              | -0.75963500 | -3.13095800 | 1.96793800  |
| H              | 0.09355100  | -1.25761400 | 1.31893800  |
| H              | 2.04553500  | -3.45257400 | 2.23861000  |
| H              | 1.46859200  | -2.11456900 | 3.25789200  |
| H              | 3.68833900  | -1.51835600 | 2.23715900  |
| H              | 2.39655800  | -0.44384600 | 1.65277500  |
| H              | 3.60606900  | -2.86411600 | 0.17360700  |
| H              | 2.08236500  | -2.37071800 | -1.69740600 |
| H              | 1.42460000  | -0.94674100 | -0.86203200 |
| H              | 0.99302000  | -3.86442700 | -0.02579000 |
| H              | -0.75020700 | -1.57073000 | -1.08286300 |
| H              | -0.37996300 | -3.07537700 | -1.94928400 |
| H              | -1.72881100 | -4.40248200 | -0.39359700 |
| H              | -2.88451600 | -3.46075400 | 1.55884500  |
| H              | -2.29678300 | -1.82607700 | 1.18286300  |
| H              | -0.49887700 | -4.20381900 | 1.97270100  |
| H              | -0.93109000 | -2.82659800 | 3.01218700  |
| C              | -3.06764400 | -2.90203900 | -1.14966200 |
| O              | -3.80178900 | -3.79752200 | -1.63888700 |
| O              | -3.30426100 | -1.65414400 | -1.27174600 |
| H              | -2.41553700 | -0.42235600 | -0.76874300 |
| N              | 3.72520500  | 0.37935800  | -0.71669900 |
| C              | 4.03391000  | -0.88529700 | -0.41707400 |
| N              | 5.32425500  | -1.04533000 | -0.71261200 |
| C              | 4.83646100  | 1.03641500  | -1.20485400 |
| C              | 5.85047300  | 0.13275400  | -1.20451000 |
| H              | 4.80380200  | 2.07037800  | -1.50810300 |
| H              | 6.88115700  | 0.21620700  | -1.50823500 |
| H              | 5.82900900  | -1.91817300 | -0.58919200 |
| O              | -1.94118000 | 0.42949600  | -0.50777200 |
| H              | -0.08768000 | 0.84477500  | -0.41063200 |
| O              | 0.76451600  | 1.18699900  | -0.06483200 |
| H              | 2.79250000  | 0.77639000  | -0.58518100 |
| C              | -2.57006200 | 0.99411800  | 0.61192900  |
| H              | -2.92280000 | 0.23975400  | 1.32441300  |
| H              | -1.87633800 | 1.67000000  | 1.12299700  |
| C              | -3.77346100 | 1.81013000  | 0.19269800  |
| F              | -3.45573200 | 2.80563300  | -0.65670500 |
| F              | -4.37164200 | 2.37646400  | 1.25850300  |
| F              | -4.70229300 | 1.06044200  | -0.43167000 |
| C              | 0.73386600  | 2.55179200  | 0.03970100  |
| C              | -0.22526000 | 3.32217800  | -0.62041900 |
| C              | 1.71547400  | 3.16162900  | 0.82349400  |
| C              | -0.20656600 | 4.70915400  | -0.47851900 |
| H              | -0.97567300 | 2.83174900  | -1.23388200 |
| C              | 1.72931700  | 4.54950000  | 0.94818400  |
| H              | 2.45029000  | 2.54243000  | 1.33069600  |
| C              | 0.76846800  | 5.33050700  | 0.30292800  |
| H              | -0.95926500 | 5.30388200  | -0.98789100 |
| H              | 2.49300900  | 5.02120300  | 1.55938100  |
| H              | 0.77989500  | 6.41036700  | 0.40847400  |

**(11) Carboxylic group – C<sub>6</sub>H<sub>5</sub>OH – CF<sub>3</sub>CH<sub>2</sub>OH – Imidazole**

|                 |             |             |             |
|-----------------|-------------|-------------|-------------|
| <b>Reactant</b> |             |             |             |
| C               | -0.87682200 | -2.03934400 | 1.03126200  |
| C               | 0.03820200  | -2.53711400 | 2.16271600  |
| C               | 1.46828700  | -2.00789200 | 1.94410800  |
| C               | 2.04249200  | -2.48650900 | 0.57860800  |
| C               | 1.06718600  | -2.17205300 | -0.58920600 |
| C               | -0.39523600 | -2.59388800 | -0.32652000 |
| C               | -1.25617900 | -2.02637900 | -1.47753100 |
| C               | -2.78789500 | -2.17153600 | -1.24268700 |
| C               | -3.22629500 | -1.72765800 | 0.18669700  |
| C               | -2.35335000 | -2.40452400 | 1.26019300  |
| H               | -0.80131000 | -0.93563700 | 0.98921900  |
| H               | 0.03472700  | -3.64070200 | 2.18446700  |
| H               | -0.34340200 | -2.18541000 | 3.13438600  |
| H               | 2.14070300  | -2.33541100 | 2.75101800  |
| H               | 1.44608100  | -0.90492200 | 1.95611700  |
| H               | 2.20804800  | -3.57498300 | 0.63049200  |
| H               | 1.43997200  | -2.65094600 | -1.50866400 |
| H               | 1.06726500  | -1.08481300 | -0.76320200 |
| H               | -0.47641800 | -3.69460900 | -0.30024900 |
| H               | -0.99037700 | -0.96348600 | -1.58664400 |
| H               | -0.99370600 | -2.52522700 | -2.42311300 |
| H               | -3.07515700 | -3.22304200 | -1.38213900 |
| H               | -4.28807300 | -1.97726100 | 0.32551100  |
| H               | -3.12843100 | -0.63467800 | 0.29728300  |
| H               | -2.47647600 | -3.50058800 | 1.22358900  |
| H               | -2.67533000 | -2.06610800 | 2.25743200  |
| C               | -3.54785600 | -1.36343100 | -2.26696500 |
| O               | -4.38575400 | -1.82453500 | -3.02230500 |
| O               | -3.28648300 | -0.04822200 | -2.32638900 |
| H               | -2.59108700 | 0.24096100  | -1.69802200 |
| N               | 3.49776100  | -0.51105800 | 0.08583900  |
| C               | 3.34966000  | -1.80711200 | 0.32056000  |
| N               | 4.55257300  | -2.42171900 | 0.31333300  |
| C               | 4.85029600  | -0.29595000 | -0.07634900 |
| C               | 5.52315600  | -1.47763300 | 0.06352200  |
| H               | 5.25103100  | 0.68656200  | -0.28036100 |
| H               | 6.57055100  | -1.72927700 | 0.00955100  |
| H               | 4.70299600  | -3.41148500 | 0.47051000  |
| O               | -1.34613400 | 1.25859200  | -0.58672300 |
| H               | -0.41549400 | 1.00459000  | -0.39971700 |
| O               | 1.37513700  | 1.10541800  | 0.00773200  |
| H               | 2.19596400  | 0.50548200  | 0.02116200  |
| C               | 1.75165000  | 2.42762700  | 0.27749200  |
| H               | 0.91676300  | 2.97098000  | 0.73289200  |
| H               | 2.62223300  | 2.48648600  | 0.94070900  |
| C               | 2.10555000  | 3.13367200  | -1.01150100 |
| F               | 2.43344100  | 4.42177700  | -0.79780000 |
| F               | 1.08603900  | 3.12540800  | -1.89157000 |
| F               | 3.15300500  | 2.55661200  | -1.63423300 |
| C               | -1.96734600 | 1.69431000  | 0.55381800  |
| C               | -3.24597900 | 2.23998400  | 0.41889200  |
| C               | -1.37353200 | 1.58251200  | 1.81363200  |
| C               | -3.93183600 | 2.67198400  | 1.55170200  |
| H               | -3.68702000 | 2.31668300  | -0.57087700 |
| C               | -2.06993800 | 2.02635800  | 2.93810600  |
| H               | -0.37626000 | 1.16040200  | 1.90727700  |
| C               | -3.35029800 | 2.56711600  | 2.81704400  |
| H               | -4.92647000 | 3.09365900  | 1.44223700  |
| H               | -1.60555200 | 1.93904800  | 3.91589200  |
| H               | -3.88810600 | 2.90371500  | 3.69738500  |
| <b>TS</b>       |             |             |             |
| C               | -1.00477500 | -2.22224700 | 0.75568700  |



|                |             |             |             |                                                                                                        |             |             |             |
|----------------|-------------|-------------|-------------|--------------------------------------------------------------------------------------------------------|-------------|-------------|-------------|
| C              | -0.14780000 | -2.93340600 | 1.81629700  | C                                                                                                      | 0.53030600  | -1.90975700 | 1.50991500  |
| C              | 1.29173900  | -2.38827600 | 1.75399300  | C                                                                                                      | 1.97089300  | -2.47906300 | 1.40167000  |
| C              | 1.92298700  | -2.63852400 | 0.35012500  | C                                                                                                      | 2.52667400  | -2.43332400 | -0.05214000 |
| C              | 0.99622600  | -2.16085100 | -0.80390600 | C                                                                                                      | 1.51635500  | -3.01118600 | -1.06433200 |
| C              | -0.48676800 | -2.56300200 | -0.65833900 | H                                                                                                      | 0.40252700  | -1.16136700 | -1.11485900 |
| C              | -1.26793300 | -1.76780500 | -1.73070700 | H                                                                                                      | -1.08781100 | -3.72732700 | -1.92360700 |
| C              | -2.81527900 | -1.80061900 | -1.56320800 | H                                                                                                      | -0.35307100 | -2.57208900 | -3.06035100 |
| C              | -3.29130000 | -1.63268200 | -0.08660600 | H                                                                                                      | -2.79210800 | -2.04659000 | -2.78232500 |
| C              | -2.50120400 | -2.55791900 | 0.85846500  | H                                                                                                      | -1.77291000 | -0.72873200 | -2.15941800 |
| H              | -0.89136900 | -1.13127900 | 0.90550800  | H                                                                                                      | -3.18967100 | -2.91799500 | -0.51328500 |
| H              | -0.15743300 | -4.02289800 | 1.64142700  | H                                                                                                      | -2.25103200 | -1.90966000 | 1.51201300  |
| H              | -0.56465900 | -2.75417800 | 2.81977700  | H                                                                                                      | -1.51339000 | -0.58301300 | 0.59371900  |
| H              | 1.93048200  | -2.85151100 | 2.51992800  | H                                                                                                      | -0.61751500 | -3.51365000 | 0.56867200  |
| H              | 1.26464200  | -1.30306400 | 1.95165500  | H                                                                                                      | 0.56278400  | -0.81294600 | 1.42241800  |
| H              | 2.13322600  | -3.71362200 | 0.24409800  | H                                                                                                      | 0.12885600  | -2.14430600 | 2.50924300  |
| H              | 1.39854500  | -2.53038400 | -1.76026000 | H                                                                                                      | 1.96284900  | -3.52912600 | 1.73167800  |
| H              | 1.02043900  | -1.06165700 | -0.84170400 | H                                                                                                      | 3.47271500  | -2.99434900 | -0.08744500 |
| H              | -0.61099600 | -3.64780600 | -0.81881400 | H                                                                                                      | 2.75163100  | -1.39303500 | -0.33430700 |
| H              | -0.91258800 | -0.72805400 | -1.67995200 | H                                                                                                      | 1.33406500  | -4.08032200 | -0.85893300 |
| H              | -1.01719200 | -2.14572700 | -2.73388300 | H                                                                                                      | 1.92879400  | -2.93466200 | -2.08259400 |
| H              | -3.19971000 | -2.75875500 | -1.93967900 | C                                                                                                      | 2.89931000  | -1.69074300 | 2.32322900  |
| H              | -4.36898800 | -1.84659500 | -0.04165000 | O                                                                                                      | 3.56126600  | -2.30131500 | 3.19791200  |
| H              | -3.14837000 | -0.59306800 | 0.24860100  | O                                                                                                      | 2.96531100  | -0.42598700 | 2.14876000  |
| H              | -2.66910600 | -3.61719300 | 0.59883100  | H                                                                                                      | 2.23668000  | 0.35413700  | 1.02812400  |
| H              | -2.85243100 | -2.40812400 | 1.89136800  | N                                                                                                      | -3.69861400 | 0.40931300  | -0.46807800 |
| C              | -3.43811500 | -0.70651300 | -2.39978500 | C                                                                                                      | -3.86497000 | -0.91528800 | -0.50514500 |
| O              | -4.29628600 | -0.90302000 | -3.24672000 | N                                                                                                      | -5.17711500 | -1.14118500 | -0.43248700 |
| O              | -3.03314700 | 0.54651200  | -2.17482000 | C                                                                                                      | -4.92214700 | 1.03711800  | -0.36382200 |
| H              | -2.32979000 | 0.65023600  | -1.47767700 | C                                                                                                      | -5.86142900 | 0.05555400  | -0.34369200 |
| N              | 3.30409400  | -0.56031800 | 0.14372300  | H                                                                                                      | -5.01565100 | 2.11019100  | -0.31716200 |
| C              | 3.20692300  | -1.88586700 | 0.25999500  | H                                                                                                      | -6.93595100 | 0.09672700  | -0.27247100 |
| N              | 4.44921500  | -2.37382200 | 0.32152000  | H                                                                                                      | -5.59405300 | -2.06754500 | -0.43488100 |
| C              | 4.63454100  | -0.19818000 | 0.13178500  | O                                                                                                      | 1.78399700  | 0.88545500  | 0.28084300  |
| C              | 5.36231500  | -1.34144600 | 0.24517000  | O                                                                                                      | -0.09239400 | 0.94631000  | -0.25879700 |
| H              | 4.94892300  | 0.82967000  | 0.04349100  | O                                                                                                      | -0.88329300 | 1.44615100  | -0.54310200 |
| H              | 6.42562800  | -1.51537800 | 0.27095700  | H                                                                                                      | -2.77842300 | 0.86254600  | -0.49707800 |
| H              | 4.67170300  | -3.36068700 | 0.40690000  | C                                                                                                      | -0.72034200 | 2.77786400  | -0.11712700 |
| O              | -1.16778800 | 1.22445400  | -0.29993400 | H                                                                                                      | 0.32395700  | 3.10383300  | -0.16711300 |
| H              | -0.01297900 | 1.08799500  | -0.19902200 | H                                                                                                      | -1.33969900 | 3.43041000  | -0.73648700 |
| O              | 1.22668700  | 1.07297900  | -0.07268200 | C                                                                                                      | -1.19314800 | 2.91104700  | 1.31318800  |
| H              | 2.46061500  | 0.09571700  | 0.06183900  | F                                                                                                      | -1.08129800 | 4.17633200  | 1.75383700  |
| C              | 1.64716000  | 2.35717900  | 0.26349400  | F                                                                                                      | -0.49304400 | 2.12945500  | 2.15661500  |
| H              | 0.85488600  | 2.95210800  | 0.74241800  | F                                                                                                      | -2.48667700 | 2.55370200  | 1.44829100  |
| H              | 2.51825800  | 2.34602500  | 0.93413200  | C                                                                                                      | 2.68018400  | 1.23864700  | -0.67904600 |
| C              | 2.06541100  | 3.11071700  | -0.97908000 | C                                                                                                      | 2.20385700  | 1.56762700  | -1.95299300 |
| F              | 2.47961400  | 4.36244800  | -0.69461400 | C                                                                                                      | 4.05515000  | 1.28525100  | -0.41744900 |
| F              | 1.05983600  | 3.22367200  | -1.87055400 | C                                                                                                      | 3.09839700  | 1.94694900  | -2.95221200 |
| C              | 3.08048500  | 2.50128100  | -1.62722400 | H                                                                                                      | 1.13644100  | 1.51973600  | -2.15007400 |
| C              | -1.75666200 | 1.53028200  | 0.87491200  | C                                                                                                      | 4.93989500  | 1.65474400  | -1.42949000 |
| C              | -1.13113300 | 1.26737500  | 2.10626900  | H                                                                                                      | 4.41943000  | 1.03254700  | 0.57385600  |
| C              | -3.03592400 | 2.10954400  | 0.87472200  | C                                                                                                      | 4.47057400  | 1.99119600  | -2.70010600 |
| C              | -1.77302400 | 1.59029300  | 3.30132100  | H                                                                                                      | 2.71728200  | 2.20325600  | -3.93652600 |
| H              | -0.14011300 | 0.82109800  | 2.11667100  | H                                                                                                      | 6.00477600  | 1.68349800  | -1.21754000 |
| C              | -3.67126300 | 2.41616600  | 2.07578900  | H                                                                                                      | 5.16352600  | 2.28239100  | -3.48282500 |
| H              | -3.51883100 | 2.31127600  | -0.07783500 |                                                                                                        |             |             |             |
| C              | -3.04674600 | 2.16067500  | 3.29881100  |                                                                                                        |             |             |             |
| H              | -1.27169400 | 1.38614100  | 4.24347100  |                                                                                                        |             |             |             |
| H              | -4.66226700 | 2.86104000  | 2.05382100  |                                                                                                        |             |             |             |
| H              | -3.54339900 | 2.40427800  | 4.23242700  |                                                                                                        |             |             |             |
| <b>Product</b> |             |             |             | <b>(12) Carboxylic group – C<sub>6</sub>H<sub>5</sub>OH – C<sub>6</sub>H<sub>5</sub>OH – Imidazole</b> |             |             |             |
| C              | 0.18618600  | -2.24025700 | -0.97755300 | <i>Reactant</i>                                                                                        |             |             |             |
| C              | -0.81500900 | -2.66740700 | -2.06563200 | C                                                                                                      | -1.07801300 | -1.60731100 | 1.38129200  |
| C              | -2.07090400 | -1.77852100 | -1.99665400 | C                                                                                                      | -0.02697000 | -1.90162300 | 2.46370500  |
| C              | -2.76066900 | -1.90877000 | -0.60603100 | C                                                                                                      | 1.38588500  | -1.76040400 | 1.86687500  |
| C              | -1.76015200 | -1.65673300 | 0.55937000  | C                                                                                                      | 1.59056000  | -2.74607400 | 0.67973900  |
| C              | -0.43428200 | -2.43421600 | 0.42410400  | C                                                                                                      | 0.46501800  | -2.58439300 | -0.37582200 |
|                |             |             |             | C                                                                                                      | -0.96098400 | -2.61439600 | 0.21649300  |
|                |             |             |             | C                                                                                                      | -1.94508000 | -2.24095600 | -0.91594900 |
|                |             |             |             | C                                                                                                      | -3.40130500 | -1.98325700 | -0.43080100 |

|           |             |             |             |                |             |             |             |
|-----------|-------------|-------------|-------------|----------------|-------------|-------------|-------------|
| C         | -3.47585300 | -1.08568100 | 0.84405300  | C              | -2.15476800 | -2.20716500 | 1.81533600  |
| C         | -2.51409400 | -1.59949100 | 1.93159000  | H              | -0.61774400 | -0.91178100 | 1.04371600  |
| H         | -0.86884300 | -0.60153500 | 0.97170100  | H              | 0.33001800  | -3.36369200 | 2.63807100  |
| H         | -0.17377400 | -2.91971700 | 2.86435700  | H              | 0.10874900  | -1.73654800 | 3.32212600  |
| H         | -0.14910700 | -1.19591000 | 3.30048900  | H              | 2.50879400  | -2.04604300 | 2.63753300  |
| H         | 2.15937400  | -1.94055100 | 2.62840200  | H              | 1.71363900  | -0.77803000 | 1.67667900  |
| H         | 1.51861000  | -0.72792000 | 1.49509100  | H              | 2.30064800  | -3.68258500 | 0.82750200  |
| H         | 1.58137100  | -3.77592900 | 1.07264000  | H              | 1.19775900  | -3.23880500 | -1.31281800 |
| H         | 0.57298500  | -3.36599800 | -1.14467800 | H              | 0.94645600  | -1.52890400 | -0.90530400 |
| H         | 0.59371500  | -1.61062900 | -0.87596900 | H              | -0.55484400 | -3.89120300 | 0.33069500  |
| H         | -1.19086800 | -3.62272800 | 0.60331900  | H              | -1.14020700 | -1.47113600 | -1.44587000 |
| H         | -1.54712700 | -1.33828800 | -1.40381200 | H              | -1.35680700 | -3.17094300 | -1.89408400 |
| H         | -1.96335600 | -3.03774200 | -1.67567600 | H              | -3.31993800 | -3.42856200 | -0.51945700 |
| H         | -3.88139400 | -2.94525000 | -0.20341800 | H              | -4.18516300 | -1.84183100 | 1.07916700  |
| H         | -4.51393200 | -1.07503100 | 1.20647900  | H              | -2.99644200 | -0.59695500 | 0.64875800  |
| H         | -3.20181200 | -0.04524300 | 0.59980000  | H              | -2.32120300 | -3.28188800 | 2.00279700  |
| H         | -2.79941400 | -2.61619300 | 2.25167300  | H              | -2.31847800 | -1.67437900 | 2.76497000  |
| H         | -2.57576600 | -0.94206800 | 2.81323200  | C              | -3.76404600 | -1.70482200 | -1.66207300 |
| C         | -4.20675700 | -1.33459600 | -1.53132600 | O              | -4.75155700 | -2.20100600 | -2.18434800 |
| O         | -5.25566300 | -1.77805500 | -1.96614800 | O              | -3.40055200 | -0.47079300 | -2.01404100 |
| O         | -3.73981500 | -0.18334800 | -2.03926500 | H              | -2.58641200 | -0.11121400 | -1.55456000 |
| H         | -2.88761400 | 0.10385400  | -1.64641200 | N              | 3.38826600  | -0.83510800 | -0.59424600 |
| N         | 3.20720000  | -1.40895100 | -0.68188500 | C              | 3.33120900  | -2.02920600 | -0.00080900 |
| C         | 2.91667000  | -2.47757500 | 0.04514400  | N              | 4.57133000  | -2.52076900 | 0.00824200  |
| N         | 4.01187300  | -3.25672400 | 0.18383200  | C              | 4.68820800  | -0.55589100 | -0.96015400 |
| C         | 4.54205300  | -1.51111600 | -1.01355300 | C              | 5.43937200  | -1.62393900 | -0.58355800 |
| C         | 5.05845200  | -2.65974400 | -0.48308700 | H              | 4.95914600  | 0.36206200  | -1.45713200 |
| H         | 5.03900900  | -0.75871000 | -1.60908300 | H              | 6.49274500  | -1.82845400 | -0.68455100 |
| H         | 6.04273800  | -3.09905600 | -0.52110600 | H              | 4.82043700  | -3.42442200 | 0.39906400  |
| H         | 4.04548500  | -4.13135000 | 0.69485700  | O              | -1.33272400 | 0.82380100  | -0.90001800 |
| O         | -1.28271700 | 1.04873900  | -1.12850900 | H              | -0.13226600 | 0.76417900  | -0.84503700 |
| H         | -0.38336100 | 0.66113500  | -1.08919400 | O              | 1.07296600  | 0.80990900  | -0.74516300 |
| O         | 1.53877100  | 0.56937300  | -1.26028700 | H              | 2.56101700  | -0.21722400 | -0.70707000 |
| H         | 2.17486600  | -0.18622400 | -0.99238700 | C              | -1.83366500 | 1.63238900  | 0.05638800  |
| C         | 2.06046400  | 1.78762300  | -0.93750800 | C              | -1.17422900 | 1.82451900  | 1.28419600  |
| C         | 3.07363200  | 1.92398500  | 0.01800800  | C              | -3.05367100 | 2.29241000  | -0.16509100 |
| C         | 1.52756900  | 2.92012900  | -1.56088700 | C              | -1.72551400 | 2.66194400  | 2.25298400  |
| C         | 3.54449000  | 3.19621800  | 0.34338400  | H              | -0.22812800 | 1.32158500  | 1.46793700  |
| H         | 3.47954700  | 1.04004200  | 0.50225200  | C              | -3.60020300 | 3.11786700  | 0.81559200  |
| C         | 2.00006300  | 4.18509000  | -1.21931000 | H              | -3.56059600 | 2.14885200  | -1.11557200 |
| H         | 0.74111600  | 2.79452300  | -2.29971600 | C              | -2.94140000 | 3.31159800  | 2.03133900  |
| C         | 3.01064200  | 4.33212100  | -0.26633600 | H              | -1.19961000 | 2.80177000  | 3.19344800  |
| H         | 4.33056800  | 3.29738200  | 1.08603400  | H              | -4.54596000 | 3.61729100  | 0.62434300  |
| H         | 1.57660600  | 5.06034500  | -1.70333000 | H              | -3.36626500 | 3.95925500  | 2.79145900  |
| H         | 3.37730200  | 5.31902800  | -0.00333300 | C              | 1.48828700  | 2.08962600  | -0.65752900 |
| C         | -1.49627000 | 1.90655000  | -0.08093100 | C              | 2.55221300  | 2.42478500  | 0.19694400  |
| C         | -0.61820500 | 1.99025600  | 1.00267200  | C              | 0.87704200  | 3.11127300  | -1.40607600 |
| C         | -2.64881300 | 2.69224400  | -0.12116900 | C              | 2.99589700  | 3.74295200  | 0.29158800  |
| C         | -0.89816500 | 2.87573400  | 2.04278300  | H              | 3.01707900  | 1.64199100  | 0.79208300  |
| H         | 0.27679400  | 1.37362400  | 1.02328800  | C              | 1.32113500  | 4.42747800  | -1.29552100 |
| C         | -2.92051100 | 3.56671000  | 0.92955400  | H              | 0.05323300  | 2.85934500  | -2.06859300 |
| H         | -3.31899300 | 2.60826100  | -0.97196000 | C              | 2.38395100  | 4.75486500  | -0.45049000 |
| C         | -2.04794100 | 3.66604000  | 2.01479700  | H              | 3.82175700  | 3.98026700  | 0.95655300  |
| H         | -0.21091300 | 2.94156500  | 2.88114900  | H              | 0.83330800  | 5.20378300  | -1.87866700 |
| H         | -3.81923200 | 4.17512800  | 0.89599400  | H              | 2.72895400  | 5.78074600  | -0.37134300 |
| H         | -2.26193800 | 4.35074200  | 2.82891500  | <b>Product</b> |             |             |             |
| <b>TS</b> |             |             |             | C              | -0.62953600 | -2.21599300 | 1.16098600  |
| C         | -0.71588800 | -1.97850500 | 1.32328700  | C              | 0.39616300  | -2.59937100 | 2.24353000  |
| C         | 0.34076800  | -2.28658100 | 2.39703600  | C              | 1.78242000  | -2.02845400 | 1.88358600  |
| C         | 1.72919800  | -1.86235400 | 1.88408800  | C              | 2.25928500  | -2.59017100 | 0.51059700  |
| C         | 2.09656000  | -2.63060700 | 0.57642800  | C              | 1.20017000  | -2.33343100 | -0.59463300 |
| C         | 0.96504500  | -2.54762700 | -0.48796200 | C              | -0.21321500 | -2.81004000 | -0.20386500 |
| C         | -0.45083000 | -2.82628500 | 0.06076000  | C              | -1.18695200 | -2.35835400 | -1.31472300 |
| C         | -1.44649800 | -2.45502600 | -1.06244000 | C              | -2.68942800 | -2.55216200 | -0.97603200 |
| C         | -2.93383400 | -2.40383200 | -0.61012700 | C              | -3.04946600 | -2.10924100 | 0.47410300  |
| C         | -3.14532700 | -1.68331200 | 0.75815800  | C              | -2.05644800 | -2.67755300 | 1.50774000  |

|                                                                                          |             |             |             |           |             |             |             |
|------------------------------------------------------------------------------------------|-------------|-------------|-------------|-----------|-------------|-------------|-------------|
| H                                                                                        | -0.63655500 | -1.11125000 | 1.06851500  | C         | -2.55097100 | -0.05298900 | 2.26266100  |
| H                                                                                        | 0.44945700  | -3.69856300 | 2.33143200  | H         | -0.87045400 | 0.40076500  | 0.98685000  |
| H                                                                                        | 0.07679400  | -2.20337100 | 3.21962100  | H         | -0.51129400 | -1.90002400 | 2.99504600  |
| H                                                                                        | 2.52581500  | -2.27339400 | 2.65605800  | H         | 0.01183000  | -0.22312900 | 3.27464500  |
| H                                                                                        | 1.71207200  | -0.92846700 | 1.81895100  | H         | 1.93341300  | -1.57735600 | 2.37087300  |
| H                                                                                        | 2.43918500  | -3.67200300 | 0.61129400  | H         | 1.45435600  | -0.29330100 | 1.23977000  |
| H                                                                                        | 1.52100800  | -2.82374500 | -1.52702400 | H         | 0.74609000  | -3.28170000 | 1.06621600  |
| H                                                                                        | 1.14137000  | -1.25054300 | -0.79112400 | H         | -0.52749400 | -2.80165200 | -0.97142400 |
| H                                                                                        | -0.22296600 | -3.91051000 | -0.11314300 | H         | -0.06223700 | -1.08968100 | -0.93146100 |
| H                                                                                        | -0.99207800 | -1.29528900 | -1.50960300 | H         | -1.96365000 | -2.46482000 | 1.04506600  |
| H                                                                                        | -0.96160000 | -2.90382800 | -2.24538800 | H         | -2.16223300 | -0.36112800 | -1.16960500 |
| H                                                                                        | -2.94404900 | -3.61785500 | -1.07881100 | H         | -2.96520400 | -1.93980200 | -1.15362100 |
| H                                                                                        | -4.07595400 | -2.43710700 | 0.69776700  | H         | -4.51211800 | -1.26764700 | 0.60484300  |
| H                                                                                        | -3.03545400 | -1.01031400 | 0.54403500  | H         | -4.46510500 | 0.88440500  | 1.76109600  |
| H                                                                                        | -2.09474700 | -3.78053600 | 1.51449000  | H         | -3.07978800 | 1.45629900  | 0.80592600  |
| H                                                                                        | -2.33231500 | -2.32951500 | 2.51537300  | H         | -3.00614600 | -0.92752100 | 2.75854300  |
| C                                                                                        | -3.55160500 | -1.75378000 | -1.95229200 | H         | -2.31309100 | 0.68604100  | 3.04300200  |
| O                                                                                        | -4.48056400 | -2.33297700 | -2.56508800 | C         | -4.76694800 | 0.19511900  | -0.89927000 |
| O                                                                                        | -3.29738800 | -0.50632400 | -2.08212300 | O         | -5.94381300 | -0.07164100 | -1.08486500 |
| H                                                                                        | -2.27489300 | 0.27425800  | -1.25018200 | O         | -4.19867200 | 1.14404400  | -1.65138400 |
| N                                                                                        | 3.68478400  | -0.67766200 | -0.28164700 | H         | -3.24294000 | 1.31244400  | -1.45535100 |
| C                                                                                        | 3.54319800  | -1.93958500 | 0.13236800  | N         | 2.49487700  | -1.44766500 | -1.14658200 |
| N                                                                                        | 4.76729200  | -2.46678800 | 0.18272600  | C         | 2.13190000  | -2.37030400 | -0.26746800 |
| C                                                                                        | 5.01861000  | -0.39569300 | -0.49427600 | N         | 3.06133000  | -3.34978900 | -0.20813500 |
| C                                                                                        | 5.70596500  | -1.52998700 | -0.20234700 | C         | 3.70963900  | -1.85414100 | -1.65774100 |
| H                                                                                        | 5.35400900  | 0.56974300  | -0.83718700 | C         | 4.07575600  | -3.04059800 | -1.08611600 |
| H                                                                                        | 6.75939900  | -1.75510700 | -0.23420700 | H         | 4.23584900  | -1.27546400 | -2.40324600 |
| H                                                                                        | 4.95819200  | -3.42529800 | 0.46034000  | H         | 4.93322700  | -3.68057400 | -1.22222600 |
| O                                                                                        | -1.59047100 | 0.79741500  | -0.69269200 | H         | 3.00673900  | -4.17141600 | 0.38242800  |
| H                                                                                        | 0.30815900  | 0.92622400  | -0.75498800 | O         | -1.59914100 | 1.97267800  | -1.39146000 |
| O                                                                                        | 1.25333000  | 1.14174800  | -0.60711300 | H         | -0.77286800 | 1.45866600  | -1.36929300 |
| H                                                                                        | 2.90439900  | -0.02526500 | -0.40669300 | O         | 1.28257800  | 0.95989200  | -1.22909500 |
| C                                                                                        | 1.45299400  | 2.49486100  | -0.67753800 | H         | 1.74525400  | 0.05818600  | -1.20680800 |
| C                                                                                        | 2.70486400  | 2.98819000  | -0.30578800 | C         | 1.99361300  | 1.89214800  | -0.53613700 |
| C                                                                                        | 0.44978300  | 3.36547700  | -1.10952400 | C         | 1.50699300  | 3.20360300  | -0.50218700 |
| C                                                                                        | 2.95011000  | 4.35842800  | -0.36785800 | C         | 3.18485200  | 1.57527400  | 0.12990600  |
| H                                                                                        | 3.47329500  | 2.29933800  | 0.03354900  | C         | 2.20268300  | 4.18527700  | 0.20006800  |
| C                                                                                        | 0.70830400  | 4.73451300  | -1.16417100 | H         | 0.59204400  | 3.44282200  | -1.03559400 |
| H                                                                                        | -0.51846300 | 2.96735800  | -1.39916300 | C         | 3.87196100  | 2.56895300  | 0.82673400  |
| C                                                                                        | 1.95548700  | 5.23959800  | -0.79531100 | H         | 3.56769500  | 0.55949900  | 0.09655900  |
| H                                                                                        | 3.92481900  | 4.73704500  | -0.07489100 | C         | 3.38759100  | 3.87655200  | 0.87090800  |
| H                                                                                        | -0.07444700 | 5.40799400  | -1.50022700 | H         | 1.81580100  | 5.19996600  | 0.21862700  |
| H                                                                                        | 2.15031900  | 6.30613700  | -0.83970500 | H         | 4.79394400  | 2.31248000  | 1.34052000  |
| C                                                                                        | -2.18558300 | 1.47161000  | 0.32761700  | H         | 3.92643500  | 4.64505700  | 1.41546200  |
| C                                                                                        | -1.40533300 | 1.84651700  | 1.42775800  | H         | -1.54553800 | 2.55764000  | -0.62274500 |
| C                                                                                        | -3.54593000 | 1.79988400  | 0.29313800  | <b>TS</b> |             |             |             |
| C                                                                                        | -1.98370000 | 2.55605400  | 2.47858400  | C         | -2.03682800 | -1.50568800 | 0.99318500  |
| H                                                                                        | -0.35174800 | 1.57999100  | 1.44688500  | C         | -1.46888400 | -2.82620300 | 1.54088600  |
| C                                                                                        | -4.11468700 | 2.49899100  | 1.35713700  | C         | 0.03699200  | -2.90371900 | 1.22438100  |
| H                                                                                        | -4.14422600 | 1.50671400  | -0.56478500 | C         | 0.28668300  | -2.84841400 | -0.31553600 |
| C                                                                                        | -3.34068700 | 2.88404900  | 2.45294600  | C         | -0.46855300 | -1.67158100 | -0.99533200 |
| H                                                                                        | -1.36988400 | 2.84549600  | 3.32651700  | C         | -1.93336900 | -1.49016900 | -0.54821400 |
| H                                                                                        | -5.17169700 | 2.74693400  | 1.32464200  | C         | -2.40141700 | -0.12803900 | -1.10904600 |
| H                                                                                        | -3.78968900 | 3.43083000  | 3.27583600  | C         | -3.75773600 | 0.37473600  | -0.54415200 |
|                                                                                          |             |             |             | C         | -3.90427400 | 0.17608200  | 0.99581600  |
|                                                                                          |             |             |             | C         | -3.49416600 | -1.24855500 | 1.41646200  |
|                                                                                          |             |             |             | H         | -1.41401700 | -0.67711300 | 1.38547700  |
|                                                                                          |             |             |             | H         | -2.00294300 | -3.68024700 | 1.08959800  |
|                                                                                          |             |             |             | H         | -1.61530500 | -2.87830400 | 2.63029200  |
|                                                                                          |             |             |             | H         | 0.48245500  | -3.82621000 | 1.62403900  |
|                                                                                          |             |             |             | H         | 0.54402800  | -2.05113000 | 1.70651200  |
|                                                                                          |             |             |             | H         | -0.02808600 | -3.80504700 | -0.75933200 |
|                                                                                          |             |             |             | H         | -0.41844500 | -1.80082400 | -2.08772000 |
|                                                                                          |             |             |             | H         | 0.04911900  | -0.73140500 | -0.75292900 |
|                                                                                          |             |             |             | H         | -2.56263700 | -2.30681100 | -0.94155700 |
|                                                                                          |             |             |             | H         | -1.61570300 | 0.60314200  | -0.87399600 |
| <b>(13) Carboxylic group – H<sub>2</sub>O – C<sub>6</sub>H<sub>5</sub>OH – Imidazole</b> |             |             |             |           |             |             |             |
| <b>Reactant</b>                                                                          |             |             |             |           |             |             |             |
| C                                                                                        | -1.26655200 | -0.48055200 | 1.53196800  |           |             |             |             |
| C                                                                                        | -0.17205700 | -0.97694300 | 2.49338900  |           |             |             |             |
| C                                                                                        | 1.12574700  | -1.23838300 | 1.70483500  |           |             |             |             |
| C                                                                                        | 0.90693800  | -2.30152500 | 0.58789200  |           |             |             |             |
| C                                                                                        | -0.31857000 | -1.95425700 | -0.29893500 |           |             |             |             |
| C                                                                                        | -1.58768300 | -1.58291000 | 0.49660000  |           |             |             |             |
| C                                                                                        | -2.64935100 | -1.09925600 | -0.51597500 |           |             |             |             |
| C                                                                                        | -3.90739300 | -0.47156200 | 0.14788200  |           |             |             |             |
| C                                                                                        | -3.54207700 | 0.56371500  | 1.25654300  |           |             |             |             |

|                |             |             |             |
|----------------|-------------|-------------|-------------|
| H              | -2.47600500 | -0.18296400 | -2.20686000 |
| H              | -4.57623800 | -0.17039400 | -1.03567600 |
| H              | -4.94823100 | 0.38210000  | 1.27578600  |
| H              | -3.27118800 | 0.89693400  | 1.53480700  |
| H              | -4.15620100 | -1.99640800 | 0.94697100  |
| H              | -3.59447900 | -1.35280400 | 2.50800000  |
| C              | -3.92488000 | 1.84744300  | -0.87073100 |
| O              | -4.92131600 | 2.26358400  | -1.47246700 |
| O              | -2.98651200 | 2.67276100  | -0.48446900 |
| H              | -2.08124300 | 2.32307200  | 0.11145600  |
| N              | 2.41194100  | -1.52080300 | -0.37519400 |
| C              | 1.74547200  | -2.66461800 | -0.55666300 |
| N              | 2.63940900  | -3.75899900 | -0.93511400 |
| C              | 3.75297700  | -1.71221800 | -0.63865700 |
| C              | 3.89891000  | -3.01491400 | -0.99500500 |
| H              | 4.47398800  | -0.91437100 | -0.55692500 |
| H              | 4.76773400  | -3.58243000 | -1.28598400 |
| H              | 2.40941500  | -4.54533200 | -1.14794700 |
| O              | -1.01947500 | 2.14802600  | 0.81914500  |
| H              | -0.00673900 | 1.55159400  | 0.55869200  |
| O              | 1.05819400  | 0.99597300  | 0.40778100  |
| H              | 1.96519400  | -0.64184800 | -0.06846600 |
| C              | 2.06885700  | 1.88398100  | 0.35602000  |
| C              | 1.91472200  | 3.14117500  | -0.25709500 |
| C              | 3.31986100  | 1.55652000  | 0.90881500  |
| C              | 2.98067300  | 4.03734000  | -0.30774100 |
| H              | 0.95438800  | 3.40069100  | -0.69431700 |
| C              | 4.38266000  | 2.45551700  | 0.84239600  |
| H              | 3.44215100  | 0.59378000  | 1.40022100  |
| C              | 4.22284100  | 3.70345600  | 0.23655100  |
| H              | 2.83898700  | 5.00420000  | -0.78301300 |
| H              | 5.34074300  | 2.18004000  | 1.27488600  |
| H              | 5.05086600  | 4.40342900  | 0.18988200  |
| H              | -1.28141200 | 1.88773200  | 1.71231400  |
| <b>Product</b> |             |             |             |
| C              | -1.44156000 | -0.79752300 | 1.50204600  |
| C              | -0.51046600 | -1.61216200 | 2.41884700  |
| C              | 0.83553700  | -1.86493600 | 1.71168700  |
| C              | 0.61972000  | -2.63595200 | 0.37363400  |
| C              | -0.44939300 | -1.94878500 | -0.52384600 |
| C              | -1.75427700 | -1.60746300 | 0.22304500  |
| C              | -2.64855400 | -0.78951700 | -0.73423000 |
| C              | -3.92201000 | -0.21728700 | -0.06170600 |
| C              | -3.57937800 | 0.51741600  | 1.26579500  |
| C              | -2.74918800 | -0.38427000 | 2.20177200  |
| H              | -0.90715300 | 0.12473300  | 1.19930700  |
| H              | -0.99225100 | -2.57106300 | 2.67691500  |
| H              | -0.33167800 | -1.06713600 | 3.35810400  |
| H              | 1.51520400  | -2.44579200 | 2.35210700  |
| H              | 1.31741500  | -0.89475700 | 1.50397600  |
| H              | 0.30186600  | -3.66423700 | 0.60499600  |
| H              | -0.66340700 | -2.59841800 | -1.38698500 |
| H              | -0.03792800 | -1.00350500 | -0.91443900 |
| H              | -2.27349900 | -2.53542600 | 0.52180200  |
| H              | -2.04301900 | 0.04151600  | -1.12514300 |
| H              | -2.94014400 | -1.41465300 | -1.59394100 |
| H              | -4.61352300 | -1.04311300 | 0.16567700  |
| H              | -4.51238500 | 0.83424100  | 1.75641900  |
| H              | -2.99643100 | 1.42449800  | 1.03624900  |
| H              | -3.32499600 | -1.28595500 | 2.47398500  |
| H              | -2.51889900 | 0.15579800  | 3.13305000  |
| C              | -4.62164100 | 0.76246600  | -1.00319900 |
| O              | -5.84727400 | 0.59588900  | -1.24787200 |
| O              | -3.92602100 | 1.71666300  | -1.47553400 |
| H              | -2.23394300 | 2.06325700  | -1.12068400 |
| N              | 2.52049500  | -1.65445400 | -0.93452200 |

|   |             |             |             |
|---|-------------|-------------|-------------|
| C | 1.90314700  | -2.70001600 | -0.37755500 |
| N | 2.66027200  | -3.76939500 | -0.62523700 |
| C | 3.69140300  | -2.06271100 | -1.53913300 |
| C | 3.77993800  | -3.40420400 | -1.34680600 |
| H | 4.34503900  | -1.37136500 | -2.04622400 |
| H | 4.52242800  | -4.12217700 | -1.65445100 |
| H | 2.42668100  | -4.71139800 | -0.32509500 |
| O | -1.28894700 | 2.33549500  | -1.02196800 |
| H | 0.31526500  | 1.44979800  | -0.78122400 |
| O | 1.18569300  | 1.07852600  | -0.51451000 |
| H | 2.16216900  | -0.69582300 | -0.88932100 |
| C | 2.03981200  | 2.07427100  | -0.12712900 |
| C | 1.79310900  | 3.41800600  | -0.41945000 |
| C | 3.19685400  | 1.70583900  | 0.56424100  |
| C | 2.70653100  | 4.38909100  | -0.01040000 |
| H | 0.89999000  | 3.69615500  | -0.97043400 |
| C | 4.10625100  | 2.68512400  | 0.95742900  |
| H | 3.37350100  | 0.65736800  | 0.78679100  |
| C | 3.86674000  | 4.03170000  | 0.67685400  |
| H | 2.50746200  | 5.43202000  | -0.23840000 |
| H | 5.00380200  | 2.39171500  | 1.49372200  |
| H | 4.57492600  | 4.79152300  | 0.99092200  |
| H | -1.30492000 | 3.16203200  | -0.52167700 |

**(14) Carboxylic group – C<sub>6</sub>H<sub>5</sub>OH – H<sub>2</sub>O – Imidazole  
Reactant**

|   |             |             |             |
|---|-------------|-------------|-------------|
| C | 0.00021700  | -0.63334900 | 1.50549400  |
| C | 1.06357300  | -0.13577000 | 2.49979900  |
| C | 2.27889600  | 0.41499100  | 1.72843000  |
| C | 2.90823700  | -0.67876700 | 0.81888900  |
| C | 1.83870800  | -1.33072900 | -0.09775800 |
| C | 0.56455500  | -1.78570900 | 0.64586000  |
| C | -0.47051400 | -2.21135100 | -0.41818200 |
| C | -1.88045000 | -2.50861100 | 0.16746100  |
| C | -2.37390000 | -1.40169700 | 1.15074400  |
| C | -1.29536300 | -1.08203300 | 2.20364700  |
| H | -0.24738400 | 0.20188600  | 0.82334600  |
| H | 1.37060000  | -0.96581300 | 3.15974500  |
| H | 0.63700400  | 0.65414800  | 3.13762100  |
| H | 3.04574000  | 0.79729700  | 2.41881100  |
| H | 1.94783900  | 1.25865600  | 1.09820600  |
| H | 3.35549900  | -1.45342000 | 1.46370900  |
| H | 2.29062000  | -2.18374500 | -0.62894900 |
| H | 1.53413700  | -0.59411500 | -0.85816900 |
| H | 0.79594200  | -2.63564100 | 1.31165500  |
| H | -0.53153900 | -1.39258100 | -1.15204400 |
| H | -0.11423600 | -3.10427700 | -0.95531600 |
| H | -1.85249600 | -3.46388500 | 0.70983500  |
| H | -3.30272000 | -1.74465700 | 1.62948700  |
| H | -2.61006500 | -0.47682600 | 0.59945300  |
| H | -1.09070100 | -1.96940100 | 2.82731600  |
| H | -1.66067300 | -0.28453500 | 2.86947300  |
| C | -2.89085700 | -2.65576500 | -0.94476500 |
| O | -3.62350400 | -3.61977500 | -1.08373400 |
| O | -2.99798400 | -1.63992800 | -1.81494600 |
| H | -2.37520400 | -0.90369600 | -1.63585900 |
| N | 3.78893000  | 0.82216500  | -0.98368900 |
| C | 3.98296600  | -0.07235900 | -0.02604400 |
| N | 5.30108500  | -0.34851700 | 0.10356500  |
| C | 5.03972600  | 1.12616600  | -1.48049300 |
| C | 5.99345700  | 0.40636900  | -0.81567000 |
| H | 5.17542200  | 1.83869500  | -2.28124600 |
| H | 7.06711100  | 0.35933800  | -0.90814600 |
| H | 5.69864700  | -1.00208200 | 0.76770300  |
| O | -1.45307600 | 0.81939900  | -1.55260000 |
| H | -0.48193900 | 0.97280300  | -1.49602200 |

|           |             |             |             |                                                                                                 |             |             |             |
|-----------|-------------|-------------|-------------|-------------------------------------------------------------------------------------------------|-------------|-------------|-------------|
| O         | 1.19332600  | 1.66709000  | -1.71735700 | H                                                                                               | -4.86066900 | 3.08007500  | -0.10272400 |
| H         | 2.10383500  | 1.39602300  | -1.43205900 | H                                                                                               | -3.60291500 | 4.37353700  | 1.61594200  |
| C         | -2.13030000 | 1.69906000  | -0.75049500 | H                                                                                               | 1.20881800  | 2.29524000  | -2.02119800 |
| C         | -3.52033200 | 1.74700100  | -0.87747300 | <b>Product</b>                                                                                  |             |             |             |
| C         | -1.47728600 | 2.50292000  | 0.18689100  | C                                                                                               | 0.09632100  | -0.76184800 | 1.52632400  |
| C         | -4.25640600 | 2.60292400  | -0.06136000 | C                                                                                               | 1.16458700  | -0.30318000 | 2.53485000  |
| H         | -4.00615400 | 1.10968600  | -1.61095400 | C                                                                                               | 2.34279100  | 0.35068200  | 1.78837600  |
| C         | -2.22668900 | 3.36291100  | 0.99021600  | C                                                                                               | 2.99098000  | -0.66578600 | 0.80106700  |
| H         | -0.39597700 | 2.45834000  | 0.28115500  | C                                                                                               | 1.93137800  | -1.27955600 | -0.15612200 |
| C         | -3.61591000 | 3.41482700  | 0.87690800  | C                                                                                               | 0.68303200  | -1.82334600 | 0.56996700  |
| H         | -5.33709100 | 2.63486600  | -0.16251400 | C                                                                                               | -0.35525400 | -2.20542200 | -0.50873400 |
| H         | -1.71548100 | 3.98927000  | 1.71526200  | C                                                                                               | -1.75677000 | -2.57886400 | 0.05067700  |
| H         | -4.19390400 | 4.08088300  | 1.50915200  | C                                                                                               | -2.24927400 | -1.60186700 | 1.15888500  |
| H         | 1.11899000  | 2.60677100  | -1.50329700 | C                                                                                               | -1.15865400 | -1.32850400 | 2.21341400  |
| <b>TS</b> |             |             |             | H                                                                                               | -0.20682000 | 0.11583500  | 0.92148900  |
| C         | -0.09793800 | -0.85592800 | 1.56897800  | H                                                                                               | 1.51758800  | -1.16903500 | 3.12163300  |
| C         | 0.99128500  | -0.48456800 | 2.58912600  | H                                                                                               | 0.72952800  | 0.42074100  | 3.24103400  |
| C         | 2.19975300  | 0.11558000  | 1.84447900  | H                                                                                               | 3.10776200  | 0.71241600  | 2.49053800  |
| C         | 2.78798700  | -0.90124400 | 0.82057400  | H                                                                                               | 1.96870600  | 1.22017200  | 1.22009300  |
| C         | 1.69146200  | -1.50300000 | -0.10081800 | H                                                                                               | 3.47413500  | -1.46641300 | 1.38185200  |
| C         | 0.41299300  | -1.96729100 | 0.62963600  | H                                                                                               | 2.40242100  | -2.07838100 | -0.74997900 |
| C         | -0.62994900 | -2.28308200 | -0.46919000 | H                                                                                               | 1.59224400  | -0.50104100 | -0.85791900 |
| C         | -2.09337300 | -2.43706200 | 0.03622500  | H                                                                                               | 0.95595700  | -2.70946100 | 1.16981900  |
| C         | -2.50141100 | -1.38919800 | 1.12085900  | H                                                                                               | -0.45425900 | -1.34629300 | -1.18749200 |
| C         | -1.42420800 | -1.28520900 | 2.21722200  | H                                                                                               | 0.02297600  | -3.05033500 | -1.10669600 |
| H         | -0.30121600 | 0.04026900  | 0.95370400  | H                                                                                               | -1.70802100 | -3.59034500 | 0.48122800  |
| H         | 1.29314000  | -1.37795200 | 3.16295500  | H                                                                                               | -3.14812300 | -2.02762700 | 1.63019200  |
| H         | 0.59851600  | 0.25313900  | 3.30634600  | H                                                                                               | -2.54338900 | -0.64260800 | 0.70645600  |
| H         | 2.99234700  | 0.41635800  | 2.54496400  | H                                                                                               | -0.89651700 | -2.25611700 | 2.75064200  |
| H         | 1.86831800  | 1.02016800  | 1.30575400  | H                                                                                               | -1.53835300 | -0.61012700 | 2.95723100  |
| H         | 3.29372100  | -1.70710900 | 1.37451700  | C                                                                                               | -2.76731000 | -2.58501200 | -1.09577400 |
| H         | 2.12540600  | -2.33502400 | -0.67749500 | O                                                                                               | -3.41251100 | -3.63343000 | -1.34331100 |
| H         | 1.37931500  | -0.73115000 | -0.82011500 | O                                                                                               | -2.91381500 | -1.49865900 | -1.75355300 |
| H         | 0.61978200  | -2.86580500 | 1.23610800  | H                                                                                               | -2.13816600 | -0.17116900 | -1.49463300 |
| H         | -0.57627400 | -1.46197900 | -1.19790200 | N                                                                                               | 3.81112700  | 0.94344700  | -0.94507500 |
| H         | -0.34545700 | -3.20321600 | -1.00221300 | C                                                                                               | 4.03699400  | 0.02223700  | -0.00443100 |
| H         | -2.22696700 | -3.43926600 | 0.46607200  | N                                                                                               | 5.35970700  | -0.12886800 | 0.08045400  |
| H         | -3.47254400 | -1.68727000 | 1.54216900  | C                                                                                               | 5.00982900  | 1.38629900  | -1.46532400 |
| H         | -2.63012300 | -0.39278900 | 0.66567400  | C                                                                                               | 5.99202500  | 0.70804200  | -0.81769200 |
| H         | -1.29848600 | -2.25219500 | 2.73369400  | H                                                                                               | 5.05576300  | 2.13181000  | -2.24288800 |
| H         | -1.73803800 | -0.54243800 | 2.96721200  | H                                                                                               | 7.06487300  | 0.73988400  | -0.91412200 |
| C         | -3.04984500 | -2.31564700 | -1.12736400 | H                                                                                               | 5.81565200  | -0.77386700 | 0.71895200  |
| O         | -3.90389000 | -3.14557600 | -1.39599300 | O                                                                                               | -1.63726600 | 0.70355800  | -1.33745000 |
| O         | -2.96500200 | -1.21400700 | -1.88176800 | H                                                                                               | 0.25885600  | 1.22787900  | -1.58438700 |
| H         | -2.25094600 | -0.57913300 | -1.61774600 | O                                                                                               | 1.10289200  | 1.68844500  | -1.74652800 |
| N         | 3.50382700  | 0.66744600  | -1.00120400 | H                                                                                               | 2.87085600  | 1.25714800  | -1.22589200 |
| C         | 3.79206100  | -0.20408400 | -0.03578800 | C                                                                                               | -2.39442000 | 1.58026800  | -0.62226900 |
| N         | 5.12513800  | -0.30777100 | 0.04844900  | C                                                                                               | -1.74810600 | 2.58472400  | 0.10656400  |
| C         | 4.68578600  | 1.12810600  | -1.54220100 | C                                                                                               | -3.79177500 | 1.49523200  | -0.60339700 |
| C         | 5.71130900  | 0.51950100  | -0.88642700 | C                                                                                               | -2.49913600 | 3.50645800  | 0.83383500  |
| H         | 4.70129600  | 1.84519700  | -2.34825200 | H                                                                                               | -0.66266800 | 2.63516900  | 0.09539800  |
| H         | 6.78090300  | 0.59048500  | -1.00011900 | C                                                                                               | -4.53016100 | 2.41423300  | 0.14065300  |
| H         | 5.61140800  | -0.91244600 | 0.70235300  | H                                                                                               | -4.28667400 | 0.71071700  | -1.16865600 |
| O         | -1.15174100 | 0.84788900  | -1.40862700 | C                                                                                               | -3.89252400 | 3.42598000  | 0.86062400  |
| H         | -0.02179000 | 1.06821400  | -1.53455300 | H                                                                                               | -1.98829300 | 4.28688100  | 1.39027400  |
| O         | 1.18675000  | 1.36546900  | -1.75690100 | H                                                                                               | -5.61355600 | 2.33816900  | 0.15238300  |
| H         | 2.44822200  | 0.98594800  | -1.32104500 | H                                                                                               | -4.47297800 | 4.14131600  | 1.43418000  |
| C         | -1.75989900 | 1.77048200  | -0.63367300 | H                                                                                               | 0.88295300  | 2.62870300  | -1.70059900 |
| C         | -1.05564400 | 2.49688600  | 0.34249300  |                                                                                                 |             |             |             |
| C         | -3.13842500 | 1.99559500  | -0.78112000 | <b>(15) Carboxylic group – CH<sub>2</sub>FCH<sub>2</sub>OH – C<sub>6</sub>H<sub>5</sub>OH –</b> |             |             |             |
| C         | -1.71987500 | 3.43260900  | 1.13451100  | <b>Imidazole</b>                                                                                |             |             |             |
| H         | 0.00966800  | 2.32581100  | 0.46963500  | <b>Reactant</b>                                                                                 |             |             |             |
| C         | -3.79353500 | 2.92202600  | 0.02661800  | C                                                                                               | -1.21119300 | -1.57228700 | 1.40485400  |
| H         | -3.68238000 | 1.43593700  | -1.53731000 | C                                                                                               | -0.17100400 | -2.21707500 | 2.33794700  |
| C         | -3.09125400 | 3.64898700  | 0.99066800  | C                                                                                               | 1.22740200  | -2.12152600 | 1.69930800  |
| H         | -1.15842100 | 3.98871700  | 1.88032400  | C                                                                                               | 1.26647100  | -2.84350700 | 0.31950100  |

|           |             |             |             |                |             |             |             |
|-----------|-------------|-------------|-------------|----------------|-------------|-------------|-------------|
| C         | 0.11348100  | -2.36396200 | -0.60404300 | C              | -3.20149700 | -1.75916900 | 1.40906900  |
| C         | -1.27506900 | -2.34575500 | 0.06942200  | H              | -1.22676900 | -0.91189100 | 1.22636100  |
| C         | -2.25648200 | -1.66192200 | -0.90754500 | H              | -1.37338200 | -3.95265500 | 1.66740800  |
| C         | -3.65366600 | -1.36969000 | -0.28797800 | H              | -1.14766400 | -2.75775100 | 2.96653500  |
| C         | -3.56654600 | -0.71413000 | 1.12372400  | H              | 1.09320900  | -3.60225000 | 2.20540500  |
| C         | -2.61068600 | -1.50102800 | 2.04056200  | H              | 0.89356700  | -1.87041800 | 1.85335100  |
| H         | -0.87630000 | -0.53988600 | 1.18170300  | H              | 0.64713900  | -4.22806900 | -0.11393900 |
| H         | -0.43890500 | -3.27230200 | 2.52067800  | H              | 0.02411800  | -2.66700000 | -1.88000100 |
| H         | -0.17044900 | -1.70120300 | 3.31052600  | H              | 0.29333700  | -1.25837000 | -0.83481800 |
| H         | 1.99461000  | -2.55692500 | 2.35659400  | H              | -2.05394100 | -3.20806400 | -0.62750600 |
| H         | 1.47910500  | -1.05684000 | 1.55149900  | H              | -1.55318800 | -0.26431900 | -1.29540800 |
| H         | 1.17344700  | -3.92863000 | 0.48807100  | H              | -2.25916100 | -1.47797000 | -2.37310400 |
| H         | 0.08879100  | -2.99566900 | -1.50649800 | H              | -4.36497500 | -1.48438800 | -1.21606000 |
| H         | 0.33270300  | -1.33520900 | -0.93135500 | H              | -4.86751300 | -0.43334200 | 0.89369100  |
| H         | -1.60935200 | -3.37601000 | 0.28384900  | H              | -3.28242100 | 0.35782600  | 0.99476600  |
| H         | -1.78706100 | -0.72179800 | -1.23515500 | H              | -3.73613800 | -2.68641100 | 1.14103600  |
| H         | -2.39235000 | -2.28719500 | -1.80374100 | H              | -3.31625400 | -1.60980000 | 2.49392100  |
| H         | -4.21356400 | -2.31115800 | -0.20127000 | C              | -4.03220900 | 0.58479900  | -1.55600500 |
| H         | -4.57754000 | -0.67012400 | 1.55443200  | O              | -5.06409000 | 0.69762100  | -2.21949800 |
| H         | -3.20172400 | 0.32046400  | 1.03738300  | O              | -3.23444400 | 1.61832200  | -1.39630200 |
| H         | -2.99432900 | -2.52255800 | 2.20580100  | H              | -2.33722200 | 1.52602300  | -0.78691600 |
| H         | -2.55321000 | -1.00455700 | 3.02177700  | N              | 2.74554400  | -1.60055100 | -0.23464000 |
| C         | -4.43781600 | -0.46353600 | -1.20630200 | C              | 2.24069200  | -2.83630300 | -0.19357200 |
| O         | -5.51815200 | -0.75090400 | -1.69440200 | N              | 3.25526400  | -3.67746900 | -0.39709500 |
| O         | -3.90603500 | 0.73437200  | -1.48389000 | C              | 4.10500300  | -1.65522300 | -0.46414100 |
| H         | -3.02871800 | 0.89459500  | -1.06224700 | C              | 4.42976700  | -2.97048800 | -0.56905900 |
| N         | 2.93405200  | -1.37568700 | -0.81959500 | H              | 4.71143100  | -0.76618100 | -0.53446900 |
| C         | 2.57362700  | -2.55982800 | -0.34785400 | H              | 5.37219500  | -3.46081400 | -0.75082300 |
| N         | 3.57179100  | -3.45328200 | -0.52105100 | H              | 3.15687900  | -4.68795900 | -0.42178000 |
| C         | 4.21518100  | -1.52133300 | -1.30766800 | O              | -1.21480400 | 1.66365400  | -0.02662600 |
| C         | 4.62698700  | -2.81318200 | -1.13287000 | H              | -0.09267100 | 1.18361100  | -0.03403500 |
| H         | 4.75068900  | -0.69754900 | -1.75758400 | O              | 1.02547200  | 0.78389700  | 0.06275200  |
| H         | 5.54273600  | -3.32542000 | -1.38255100 | H              | 2.17351800  | -0.75285800 | -0.09794000 |
| H         | 3.53787300  | -4.42897800 | -0.24938300 | C              | -1.50760900 | 2.23583600  | 1.22878600  |
| O         | -1.40239600 | 1.56497500  | -0.49403900 | H              | -2.56196400 | 2.54194600  | 1.25640000  |
| H         | -0.53838900 | 1.13478900  | -0.63642400 | H              | -1.34514700 | 1.51250200  | 2.04234700  |
| O         | 1.40948500  | 0.80978300  | -0.70106700 | C              | -0.63985500 | 3.45949000  | 1.46040400  |
| H         | 1.98517800  | -0.03325000 | -0.70356500 | F              | -1.02361000 | 4.05131600  | 2.67722000  |
| C         | -1.37258700 | 2.24599100  | 0.75674100  | C              | 1.92625600  | 1.75129000  | -0.20183800 |
| H         | -1.52542300 | 1.54672800  | 1.58983400  | C              | 1.66304800  | 2.77453600  | -1.13075200 |
| H         | -0.40569400 | 2.74209800  | 0.89616200  | C              | 3.16909000  | 1.74224200  | 0.45466900  |
| C         | -2.48107000 | 3.25882700  | 0.77719100  | C              | 2.61627200  | 3.75996200  | -1.38132000 |
| F         | -2.20163600 | 4.27690000  | -0.15211400 | H              | 0.70763600  | 2.78747800  | -1.64786100 |
| C         | 2.15034000  | 1.88439700  | -0.30645400 | C              | 4.11995800  | 2.72531200  | 0.18699000  |
| C         | 1.71873400  | 3.16258700  | -0.67594900 | H              | 3.37205900  | 0.96153500  | 1.18455100  |
| C         | 3.30929500  | 1.73283300  | 0.46358400  | C              | 3.85104200  | 3.74435300  | -0.72874700 |
| C         | 2.43942900  | 4.28282200  | -0.26781900 | H              | 2.39217700  | 4.54478200  | -2.09866100 |
| H         | 0.81714200  | 3.26020000  | -1.27545600 | H              | 5.07398700  | 2.69828200  | 0.70632700  |
| C         | 4.02893000  | 2.86214800  | 0.85426800  | H              | 4.59019200  | 4.51301500  | -0.93016200 |
| H         | 3.63660700  | 0.73815300  | 0.75271600  | H              | -0.78358200 | 4.20382800  | 0.67242300  |
| C         | 3.59981900  | 4.14067700  | 0.49604700  | H              | 0.42006100  | 3.20305100  | 1.54696300  |
| H         | 2.09419200  | 5.27155200  | -0.55567300 | <b>Product</b> |             |             |             |
| H         | 4.92932300  | 2.73823400  | 1.44908800  | C              | -0.84977200 | -1.92984400 | 1.39400600  |
| H         | 4.16208100  | 5.01538300  | 0.80656900  | C              | 0.27437200  | -2.45690800 | 2.30466300  |
| H         | -3.43576100 | 2.81282200  | 0.48228400  | C              | 1.65099600  | -2.09527500 | 1.71209600  |
| H         | -2.56656000 | 3.72600900  | 1.76066200  | C              | 1.80976000  | -2.71216300 | 0.29055800  |
| <b>TS</b> |             |             |             | C              | 0.62324900  | -2.32140800 | -0.63481200 |
| C         | -1.71227600 | -1.89292400 | 1.04917200  | C              | -0.75665300 | -2.58857200 | -0.00180100 |
| C         | -0.97884900 | -2.94753700 | 1.89583400  | C              | -1.83188400 | -2.00551700 | -0.94465900 |
| C         | 0.53051800  | -2.87986700 | 1.59688400  | C              | -3.26820900 | -2.03841800 | -0.35947400 |
| C         | 0.81373800  | -3.15938000 | 0.08752200  | C              | -3.31249000 | -1.49472900 | 1.09677500  |
| C         | -0.07808600 | -2.29468500 | -0.84894900 | C              | -2.24990300 | -2.17027900 | 1.98660500  |
| C         | -1.56696000 | -2.23369000 | -0.45013000 | H              | -0.71062600 | -0.83667300 | 1.26573700  |
| C         | -2.21805000 | -1.13841500 | -1.32617400 | H              | 0.18191000  | -3.55222600 | 2.40935200  |
| C         | -3.64846400 | -0.71955300 | -0.88456500 | H              | 0.18003800  | -2.01889700 | 3.31007500  |
| C         | -3.79982300 | -0.55342800 | 0.65867900  | H              | 2.46557500  | -2.45729400 | 2.35573200  |

|   |             |             |             |           |             |             |             |
|---|-------------|-------------|-------------|-----------|-------------|-------------|-------------|
| H | 1.73663900  | -0.99728700 | 1.64645000  | H         | 1.53835900  | -2.77614200 | -1.13187300 |
| H | 1.85983300  | -3.80816400 | 0.38294300  | H         | 1.14715100  | -1.07176300 | -0.83160800 |
| H | 0.71463600  | -2.86454600 | -1.58829800 | H         | -0.23976600 | -3.48585300 | 0.45570100  |
| H | 0.68092700  | -1.24416000 | -0.85871000 | H         | -0.97212800 | -1.21213100 | -1.46035400 |
| H | -0.90954900 | -3.67555900 | 0.12122800  | H         | -0.95228000 | -2.93786100 | -1.86458300 |
| H | -1.55441700 | -0.96272900 | -1.15878500 | H         | -2.91751200 | -3.40919800 | -0.52412900 |
| H | -1.82064000 | -2.55225800 | -1.90133600 | H         | -4.07801600 | -1.82649400 | 0.90406500  |
| H | -3.63078900 | -3.07745500 | -0.35413600 | H         | -3.02442100 | -0.48040000 | 0.43162700  |
| H | -4.32176400 | -1.64829700 | 1.50842400  | H         | -2.11541300 | -2.95277700 | 2.03028900  |
| H | -3.12120800 | -0.41046200 | 1.08442200  | H         | -2.33223900 | -1.29763600 | 2.64781400  |
| H | -2.43891600 | -3.25552600 | 2.05469400  | C         | -3.54911600 | -1.85671200 | -1.81115800 |
| H | -2.30279500 | -1.76008100 | 3.00707400  | O         | -4.42489600 | -2.51928800 | -2.33983300 |
| C | -4.20229100 | -1.19926800 | -1.23074900 | O         | -3.35352700 | -0.59940600 | -2.23935800 |
| O | -5.23043300 | -1.73838300 | -1.71714300 | H         | -2.62543500 | -0.13254900 | -1.77703800 |
| O | -3.89594100 | 0.02507000  | -1.40852300 | N         | 3.61096300  | -0.24058800 | -0.38685400 |
| H | -2.49528200 | 0.81002500  | -0.89907400 | C         | 3.53088400  | -1.40775700 | 0.23431000  |
| N | 3.33136000  | -0.98122900 | -0.70010900 | N         | 4.75804800  | -1.96233300 | 0.35252400  |
| C | 3.08052900  | -2.23732600 | -0.32149700 | C         | 4.94646900  | -0.04745500 | -0.67467800 |
| N | 4.17967600  | -2.94476400 | -0.58532900 | C         | 5.67566000  | -1.11121100 | -0.22027700 |
| C | 4.61001500  | -0.88664100 | -1.21046400 | H         | 5.29653700  | 0.83583500  | -1.18958000 |
| C | 5.14895800  | -2.13098000 | -1.13810900 | H         | 6.72960200  | -1.33835600 | -0.25210800 |
| H | 5.01299500  | 0.04416200  | -1.57555900 | H         | 4.95397300  | -2.85547300 | 0.78872400  |
| H | 6.11549800  | -2.50832100 | -1.42949700 | O         | -1.36030800 | 1.18948400  | -1.07712200 |
| H | 4.27234900  | -3.93849600 | -0.39617800 | H         | -0.39705800 | 1.04820700  | -0.92756900 |
| O | -1.71632200 | 1.36373200  | -0.61917100 | O         | 1.39042400  | 1.29944500  | -0.87225800 |
| H | 0.10664300  | 1.03297700  | -0.50077400 | H         | 2.19133100  | 0.72503700  | -0.69010900 |
| O | 1.03571000  | 1.01887500  | -0.18095800 | C         | 1.71082200  | 2.63739500  | -0.52911800 |
| H | 2.65530900  | -0.21849600 | -0.60754700 | H         | 0.78550700  | 3.22241100  | -0.55134900 |
| C | -2.10748700 | 2.19898500  | 0.45770100  | H         | 2.13427900  | 2.69436000  | 0.48250700  |
| H | -2.78654000 | 1.67349800  | 1.13960300  | C         | 2.69996200  | 3.19610900  | -1.53441900 |
| H | -1.20832400 | 2.47822100  | 1.01800100  | F         | 3.01011100  | 4.51538600  | -1.16857800 |
| C | -2.78976700 | 3.44082600  | -0.08171300 | C         | -1.92985800 | 1.85843700  | -0.02650500 |
| F | -3.16150800 | 4.24942800  | 1.00515300  | C         | -3.24221400 | 2.30742700  | -0.18840100 |
| C | 1.53282300  | 2.28916000  | -0.07098100 | C         | -1.25268300 | 2.07162900  | 1.17711900  |
| C | 0.92785700  | 3.37813400  | -0.70307400 | C         | -3.87755300 | 2.96950800  | 0.85967500  |
| C | 2.69165000  | 2.46536000  | 0.68765900  | H         | -3.74884600 | 2.13024800  | -1.13279900 |
| C | 1.48306700  | 4.64925600  | -0.55885600 | C         | -1.89875800 | 2.74345200  | 2.21510100  |
| H | 0.03306400  | 3.22224400  | -1.29949800 | H         | -0.23011500 | 1.72209900  | 1.29420200  |
| C | 3.24115900  | 3.73958900  | 0.81590700  | C         | -3.21169600 | 3.19077800  | 2.06693200  |
| H | 3.14459100  | 1.60488400  | 1.17244900  | H         | -4.89831000 | 3.31610400  | 0.72906600  |
| C | 2.63975700  | 4.83810900  | 0.19863500  | H         | -1.36824800 | 2.91169500  | 3.14759100  |
| H | 1.00654000  | 5.49393600  | -1.04758200 | H         | -3.70952800 | 3.70816500  | 2.88043200  |
| H | 4.14219900  | 3.87329900  | 1.40725600  | H         | 2.27524600  | 3.22293300  | -2.54093100 |
| H | 3.06854700  | 5.82902900  | 0.30660500  | H         | 3.63383800  | 2.62604100  | -1.53433700 |
| H | -2.11819600 | 4.02787300  | -0.71411600 | <b>TS</b> |             |             |             |
| H | -3.70045600 | 3.18699000  | -0.63138300 | C         | -0.76600400 | -1.87981100 | 1.09003900  |

**(16) Carboxylic group – C<sub>6</sub>H<sub>5</sub>OH – CH<sub>2</sub>FCH<sub>2</sub>OH – Imidazole**

**Reactant**

|   |             |             |             |   |             |             |             |
|---|-------------|-------------|-------------|---|-------------|-------------|-------------|
| C | -0.62797300 | -1.53792600 | 1.31344700  | C | -0.32129300 | -2.48936600 | -0.25548300 |
| C | 0.39110500  | -1.65121000 | 2.45984800  | C | -1.21201700 | -1.97401700 | -1.41050000 |
| C | 1.77144000  | -1.16660600 | 1.97888900  | C | -2.74115900 | -2.02496700 | -1.12733300 |
| C | 2.27195500  | -2.00966700 | 0.76986700  | C | -3.12432600 | -1.55467400 | 0.31056200  |
| C | 1.20759200  | -2.06454200 | -0.35854100 | C | -2.23524700 | -2.23638700 | 1.36812600  |
| C | -0.21116300 | -2.43248800 | 0.12571000  | H | -0.70001900 | -0.77823100 | 1.00331500  |
| C | -1.17610000 | -2.21847100 | -1.06167600 | H | 0.23487800  | -3.42185000 | 2.25749100  |
| C | -2.67808300 | -2.34815900 | -0.67967600 | H | -0.17391700 | -1.95738000 | 3.18206400  |
| C | -3.04821600 | -1.56621400 | 0.61838100  | H | 2.30021000  | -1.99823800 | 2.73039800  |
| C | -2.05979200 | -1.88511900 | 1.75658200  | H | 1.50945300  | -0.63299600 | 1.90891600  |
| H | -0.62505800 | -0.49068400 | 0.95736000  | H | 2.42484700  | -3.29681300 | 0.66686600  |
| H | 0.45018300  | -2.69880600 | 2.80357500  | H | 1.48838100  | -2.60357400 | -1.47485500 |
| H | 0.06047200  | -1.04064800 | 3.31513900  | H | 1.07920500  | -0.99333500 | -0.85507800 |
| H | 2.51520600  | -1.22128200 | 2.78804000  | H | -0.39068200 | -3.58809200 | -0.17748100 |
| H | 1.69422100  | -0.10943400 | 1.66839900  | H | -0.90778700 | -0.93514000 | -1.60511700 |
| H | 2.48473500  | -3.03273800 | 1.12146100  | H | -1.00476700 | -2.54805700 | -2.32688400 |

|                |             |             |             |   |             |             |             |
|----------------|-------------|-------------|-------------|---|-------------|-------------|-------------|
| H              | -3.10196400 | -3.05428100 | -1.25813600 | H | -1.66419800 | -3.05596500 | -2.36991400 |
| H              | -4.18750300 | -1.77709200 | 0.48097200  | H | -0.85817500 | -1.82893900 | -3.37311200 |
| H              | -2.99632800 | -0.46335400 | 0.40369600  | H | -3.21018300 | -1.10379200 | -2.87338600 |
| H              | -2.37003600 | -3.33126100 | 1.34454800  | H | -2.02690700 | -0.00075700 | -2.13234100 |
| H              | -2.52686600 | -1.88512600 | 2.37012200  | H | -3.60090200 | -2.25014600 | -0.73220700 |
| C              | -3.47347500 | -1.16291900 | -2.13037400 | H | -2.45562100 | -1.64705600 | 1.35807600  |
| O              | -4.38151300 | -1.56733600 | -2.83929200 | H | -1.60850300 | -0.29720700 | 0.57472700  |
| O              | -3.11514000 | 0.12292800  | -2.22152800 | H | -1.06860300 | -3.27142200 | 0.08710000  |
| H              | -2.36527400 | 0.39856000  | -1.63323700 | H | 0.45527300  | -0.87149600 | 1.24071600  |
| N              | 3.36970600  | -0.17852100 | -0.17278400 | H | -0.08876100 | -2.28611800 | 2.16265000  |
| C              | 3.37106700  | -1.44774000 | 0.23447000  | H | 1.53352100  | -3.74241600 | 1.05759200  |
| N              | 4.64508900  | -1.84384800 | 0.33561100  | H | 3.04056700  | -3.03915000 | -0.72670900 |
| C              | 4.67333100  | 0.24082800  | -0.33366100 | H | 2.44984900  | -1.36590200 | -0.66913100 |
| C              | 5.48330400  | -0.80497000 | -0.01437700 | H | 0.76314800  | -3.80514900 | -1.51736900 |
| H              | 4.91715500  | 1.23959200  | -0.66106300 | H | 1.42023800  | -2.55081200 | -2.59316600 |
| H              | 6.55615000  | -0.90764200 | -0.00741100 | C | 2.71036800  | -2.14993300 | 1.88579200  |
| H              | 4.93252900  | -2.77313800 | 0.62582300  | O | 3.38807400  | -2.98076000 | 2.54093600  |
| O              | -1.10385700 | 1.28145400  | -0.70285200 | O | 2.86983500  | -0.88583500 | 1.97484500  |
| H              | 0.05187900  | 1.21372800  | -0.67939800 | H | 2.21109700  | 0.17780300  | 1.02351900  |
| O              | 1.30772400  | 1.26521200  | -0.67589600 | N | -3.74045300 | 1.05563500  | -0.11500800 |
| H              | 2.45601800  | 0.42252600  | -0.37379200 | C | -4.04670200 | -0.21165400 | -0.40742500 |
| C              | 1.71709500  | 2.60752300  | -0.55157600 | N | -5.37793100 | -0.29593700 | -0.41604600 |
| H              | 0.86881800  | 3.25320600  | -0.27898700 | C | -4.89525100 | 1.78821800  | 0.06559700  |
| H              | 2.47921900  | 2.71307900  | 0.23652000  | C | -5.93404500 | 0.93417600  | -0.12503700 |
| C              | 2.29803300  | 3.07013200  | -1.87385700 | H | -4.87494500 | 2.83750800  | 0.31212400  |
| F              | 2.75304200  | 4.39514200  | -1.74515200 | H | -7.00012400 | 1.08463000  | -0.07738100 |
| C              | -1.61162100 | 1.79361500  | 0.43782300  | H | -5.89097700 | -1.15134300 | -0.60745300 |
| C              | -0.87247400 | 1.81396700  | 1.63382700  | O | 1.80423400  | 0.92263900  | 0.46427800  |
| C              | -2.91940700 | 2.30498900  | 0.44095300  | H | -0.17703800 | 1.29854000  | -0.08738400 |
| C              | -1.43466100 | 2.34221100  | 2.79527800  | O | -0.93255300 | 1.90773900  | -0.00230400 |
| H              | 0.14141900  | 1.42293000  | 1.64235900  | H | -2.77493400 | 1.40860100  | -0.05374000 |
| C              | -3.47409500 | 2.81794400  | 1.61133000  | C | -0.68760600 | 2.73225900  | 1.13047000  |
| H              | -3.48971000 | 2.29024800  | -0.48408000 | H | 0.29132900  | 3.22004900  | 1.05036400  |
| C              | -2.73785600 | 2.84224800  | 2.79811500  | H | -1.46544300 | 3.50061500  | 1.14281800  |
| H              | -0.84644500 | 2.35471300  | 3.70871600  | C | -0.75437400 | 1.90289000  | 2.39940700  |
| H              | -4.48913100 | 3.20485000  | 1.59285200  | F | -0.51010000 | 2.75359700  | 3.48801500  |
| H              | -3.17088400 | 3.24580400  | 3.70764100  | C | 2.69918900  | 1.42756700  | -0.42341200 |
| H              | 3.15677000  | 2.45757100  | -2.16455300 | C | 2.27465200  | 2.44790900  | -1.28248700 |
| H              | 1.54310500  | 3.05775000  | -2.66493200 | C | 4.01790100  | 0.96119800  | -0.49550300 |
| <b>Product</b> |             |             |             | C | 3.16475100  | 2.99624900  | -2.20326700 |
| C              | -0.19208000 | -1.86568000 | -1.30019300 | H | 1.25028300  | 2.80389900  | -1.21509400 |
| C              | -1.28222100 | -2.02049900 | -2.37555200 | C | 4.89765500  | 1.51893800  | -1.42260200 |
| C              | -2.42836200 | -1.02770300 | -2.10365900 | H | 4.34469000  | 0.17211100  | 0.17544600  |
| C              | -3.06367600 | -1.28971700 | -0.70408600 | C | 4.48080200  | 2.53595500  | -2.28217500 |
| C              | -1.98694500 | -1.31915700 | 0.41681700  | H | 2.82448000  | 3.78883600  | -2.86340800 |
| C              | -0.76977200 | -2.20804800 | 0.09294000  | H | 5.91851700  | 1.15106400  | -1.47051900 |
| C              | 0.29551900  | -1.95843600 | 1.18270800  | H | 5.17127500  | 2.96465200  | -3.00119200 |
| C              | 1.65153700  | -2.65795500 | 0.90988100  | H | -1.74486000 | 1.46151900  | 2.53948300  |
| C              | 2.14920300  | -2.41908100 | -0.54648300 | H | 0.01316900  | 1.12309500  | 2.41025700  |
| C              | 1.04511500  | -2.73940600 | -1.57521400 |   |             |             |             |
| H              | 0.13165800  | -0.80430100 | -1.28725400 |   |             |             |             |
